# Supplementary material for: Spatial transcriptomics reveals antiparasitic targets associated with essential behaviors in the human parasite Brugia malayi
Source: PLoS Pathog. 2022 Apr 7;18(4):e1010399. doi: 10.1371/journal.ppat.1010399 (PMC9017939; doi:10.1371/journal.ppat.1010399)
Supplement: S1 Table — Gene IDs and available gene names are provided alongside p-values and log2FC values for comparison of head and non-head expression. (CSV) [file ppat.1010399.s001.csv]

gene_id	baseMean	log2FoldChange	lfcSE	stat	pvalue	padj	sig	protein_id	gene_name
WBGene00234641	6272.71679822146	7.34999803476165	0.280098678218096	26.2407451599562	9.11598175852839e-152	9.76777445426317e-148	yes	Bm14380	NA
WBGene00231141	3648.19328052371	-8.43290886643557	0.323060704258765	-26.1031711850692	3.3557676647528e-150	1.79785252639131e-146	yes	Bm10880a	NA
WBGene00223794	10761.5040147966	8.27832395192054	0.329109047685487	25.1537416249696	1.28607731367412e-139	4.59343947200606e-136	yes	Bm3533	Bma-flp-1
WBGene00227788	39715.0067882015	7.7800658687932	0.323425065779996	24.0552347111075	7.35859244716134e-128	1.97118295178334e-124	yes	Bm7527	Bma-tnc-2
WBGene00231175	6392.90416174409	5.5009385532602	0.233843022741244	23.5240653699007	2.3139159235322e-122	4.9587218241295e-119	yes	Bm10914	NA
WBGene00229187	31911.2361857549	5.59621464258053	0.241093312652306	23.2118202741324	3.45915856256317e-119	6.17748066631073e-116	yes	Bm8926	NA
WBGene00223959	5091.61734644255	9.91425623207152	0.432535596449788	22.9212492877969	2.85275782247048e-116	4.36675715253874e-113	yes	Bm3698a	Bma-ceh-22
WBGene00230923	17857.8341776432	-12.0834013404189	0.533678619464822	-22.6417190041008	1.68348998587751e-113	2.2548243998347e-110	yes	Bm10662	NA
WBGene00227393	6677.14632713328	7.27269955444028	0.325701700300436	22.3293263367423	1.91796550450006e-110	2.28344448674647e-107	yes	Bm7132	NA
WBGene00221077	5532.99977717211	6.0638845717621	0.27679013598474	21.9078781481447	2.18528649184194e-106	2.34153447600864e-103	yes	Bm816	NA
WBGene00225962	7341.70644170405	-6.87601179431074	0.316175794200927	-21.7474326638082	7.30552304182603e-105	7.11624358119691e-102	yes	Bm5701	NA
WBGene00233064	277091.722784081	6.30197483590479	0.290894520728497	21.6641235459593	4.47343587816951e-104	3.99440545288219e-101	yes	Bm12803	Bma-cpl-1.1
WBGene00233449	3580.87328681532	5.00450781052224	0.23138210211261	21.6287593760672	9.63393746827335e-104	7.94058769019607e-101	yes	Bm13188	NA
WBGene00230511	4205.55847241979	5.08895078399203	0.240347959521423	21.1732639383545	1.68475877269029e-99	1.28944216066975e-96	yes	Bm10250	NA
WBGene00226645	35857.8411989372	6.44522414925753	0.305900645170554	21.0696651053613	1.50995454063926e-98	1.07861086019665e-95	yes	Bm6384	Bma-flp-14
WBGene00226682	76963.3292473123	3.94983482329172	0.189325315912245	20.86268708577	1.16914723854597e-96	7.82963291313755e-94	yes	Bm6421a	Bma-col-109
WBGene00227283	34885.2690957548	5.10389662594143	0.255129139940025	20.0051496553519	4.96693296976465e-89	3.13062863358989e-86	yes	Bm7022a	Bma-ubc-19
WBGene00221852	38386.8234256028	9.14682590966846	0.459596676850285	19.9018538870943	3.92152611801795e-88	2.33439735303124e-85	yes	Bm1591	NA
WBGene00230704	12425.5642677759	-5.46621822350404	0.275796319367927	-19.8197649483923	2.01045505027712e-87	1.1337908349326e-84	yes	Bm10443	NA
WBGene00230202	70229.3493767078	4.78258251589209	0.242632337699479	19.7112328935137	1.72707538889292e-86	9.25280639599384e-84	yes	Bm9941a	Bma-col-72
WBGene00224105	10605.1282715692	5.18772002165106	0.268248855966362	19.3392065101728	2.51312390513427e-83	1.28229155445303e-80	yes	Bm3844	NA
WBGene00223171	4087.00430367358	5.26370112889992	0.279316279581563	18.8449493054445	3.23274814377842e-79	1.57449528911754e-76	yes	Bm2910a	Bma-clik-2
WBGene00228986	28594.2658942808	-10.1150609540929	0.540622134578485	-18.7100385040274	4.10078657305448e-78	1.91043165783821e-75	yes	Bm8725	NA
WBGene00230671	5006.72744952728	-7.05491272148185	0.378696620398933	-18.6294578336874	1.85392725581477e-77	8.27701272752304e-75	yes	Bm10410	NA
WBGene00221940	82463.8064305141	3.47899938564005	0.187795273788055	18.5254895688505	1.28627874353624e-76	5.51299069479634e-74	yes	Bm1679	Bma-trx-2
WBGene00227793	7560.38446819338	4.65598606469426	0.251783289912682	18.4920376022926	2.39337583609528e-76	9.86347003221574e-74	yes	Bm7532	Bma-lron-2
WBGene00233611	1874.96889100218	6.11777843111281	0.33141624389479	18.4595008356167	4.37364836248793e-76	1.73569045200216e-73	yes	Bm13350	NA
WBGene00230791	3026.90808209863	4.16375577653005	0.228116249630906	18.2527802524679	1.96642134945153e-74	7.52507312834754e-72	yes	Bm10530	NA
WBGene00223012	28749.0778105568	-5.27211300686416	0.288878644221039	-18.250269143572	2.05892428062398e-74	7.60737022996065e-72	yes	Bm2751	NA
WBGene00268737	2362.40108424494	4.92332833106295	0.270902485906937	18.173802704617	8.32253522858554e-74	2.9725321658098e-71	yes	Bm17594a	NA
WBGene00229668	2620.78335107213	4.84900956092034	0.268097150696343	18.0867627586707	4.05200855338053e-73	1.40055714998298e-70	yes	Bm9407	Bma-arrd-10
WBGene00269117	4578.12136225599	6.74300912986855	0.373310119270632	18.0627547494371	6.26182655471857e-73	2.09673348543155e-70	yes	Bm17975	Bma-flp-12
WBGene00222456	10430.357667784	4.00062062168081	0.222049073252627	18.0168309783004	1.43745247833881e-72	4.66736463800011e-70	yes	Bm2195a	NA
WBGene00224907	15077.7028632213	5.58742212025273	0.310807626383182	17.9771075287716	2.94458515053495e-72	9.27977349646531e-70	yes	Bm4646	Bma-mls-1
WBGene00233138	5780.78247241251	3.6601302549853	0.204348565180211	17.9112109339134	9.64150085845462e-72	2.95167661995261e-69	yes	Bm12877	NA
WBGene00224861	4156.95077596465	5.70875072468304	0.320094199768143	17.8345959683684	3.80792266999994e-71	1.13338587247359e-68	yes	Bm4600a	NA
WBGene00222284	12773.7105954432	3.43955138026636	0.193224575775802	17.8007966453359	6.96707213073384e-71	2.01762642921116e-68	yes	Bm2023	Bma-adah-1
WBGene00231264	6570.31821340153	4.05687711506668	0.228388681992622	17.7630392174938	1.3663180920234e-70	3.85265746211336e-68	yes	Bm11003	NA
WBGene00230512	13553.8760693434	3.951648710783	0.223559687039242	17.6760343652179	6.41529259020413e-70	1.76256051548813e-67	yes	Bm10251	NA
WBGene00222341	11104.2635493017	4.2928021120854	0.243217760666604	17.6500355085904	1.01692246503642e-69	2.72408105321631e-67	yes	Bm2080a	NA
WBGene00225426	3525.90652637444	-5.53283438025954	0.315610680139807	-17.5305676531879	8.3729392545316e-69	2.18819619786113e-66	yes	Bm5165	Bma-acr-12
WBGene00222893	49568.8971149718	4.56803576490671	0.260889297172443	17.5094793631466	1.21298368849752e-68	3.09455243386928e-66	yes	Bm2632a	NA
WBGene00225902	19465.8946975944	3.76119072451804	0.215728581144297	17.434828081506	4.4890760428653e-68	1.11861511161167e-65	yes	Bm5641	Bma-nex-2
WBGene00225022	30073.6218665852	3.56148740254069	0.204588996095578	17.4080105504641	7.17337112510398e-68	1.74687890012475e-65	yes	Bm4761a	NA
WBGene00224379	17455.3778569246	3.50725792319797	0.202175501217749	17.3475910883018	2.0569044718388e-67	4.89771809238949e-65	yes	Bm4118a	Bma-cope-1
WBGene00223573	865.850288101156	5.07345013329227	0.292940671890308	17.319036310506	3.37970252483024e-67	7.87250272903391e-65	yes	Bm3312	Bma-mig-18
WBGene00224771	527.35372901191	6.19702109413823	0.359720420521931	17.2273263918316	1.65632127731337e-66	3.77606010349209e-64	yes	Bm4510	Bma-mig-17
WBGene00220975	12589.183561952	3.49872477017322	0.203870604429543	17.16149701897	5.15671345935071e-66	1.15112884826964e-63	yes	Bm714	NA
WBGene00227527	13591.8355326138	3.45555120467562	0.202197673546082	17.0899652012469	1.76279019563433e-65	3.85475447882077e-63	yes	Bm7266	NA
WBGene00223063	12057.6801863	6.61528447183662	0.3878169849678	17.0577481860055	3.06130343937588e-65	6.43173850057109e-63	yes	Bm2802a	NA
WBGene00229607	14769.2313590289	3.98461706619366	0.233584458334434	17.0585709965716	3.01849161771845e-65	6.43173850057109e-63	yes	Bm9346	NA
WBGene00222133	28508.0347749172	4.03745316709329	0.237747536002488	16.9821030954913	1.11420801053248e-64	2.29591131401068e-62	yes	Bm1872a	NA
WBGene00229499	6038.60860527355	3.68595009181456	0.21710276565286	16.9779048218495	1.19682966293563e-64	2.41962827138778e-62	yes	Bm9238	NA
WBGene00227898	9779.4192944619	3.68437655366246	0.218563832321174	16.857210612268	9.2869728649504e-64	1.84277618977673e-61	yes	Bm7637a	NA
WBGene00225743	1916.38903129137	4.75379411197763	0.285478059192897	16.6520471850535	2.92425325138593e-62	5.69697701610914e-60	yes	Bm5482	NA
WBGene00229773	1045.92968039569	4.22923119482573	0.25477615130328	16.5997923007768	6.99324932301645e-62	1.33808333028788e-59	yes	Bm9512	NA
WBGene00222996	628.218765796664	5.42477307479356	0.326934759167065	16.5928305959706	7.85303753040134e-62	1.4762332831272e-59	yes	Bm2735	Bma-hlh-15
WBGene00220511	19774.7624726956	6.32404496088347	0.38122903044567	16.5885713202125	8.43019301703294e-62	1.5574054858191e-59	yes	Bm250	NA
WBGene00229810	64840.3321132986	3.17814557208827	0.191934508580874	16.5584896410075	1.39040665945493e-61	2.52511989085755e-59	yes	Bm9549a	NA
WBGene00223753	2289.94446152006	3.8737714636338	0.235165514688162	16.4725319899499	5.77996699593135e-61	1.03220577269007e-58	yes	Bm3492a	NA
WBGene00226979	11332.4542976084	4.01825910808173	0.244495742985724	16.4348837284924	1.07630933723337e-60	1.89059910630418e-58	yes	Bm6718	NA
WBGene00221757	3669.56421057461	4.26584315515802	0.259648776607156	16.4292827060463	1.18047010734473e-60	2.04011890325787e-58	yes	Bm1496	NA
WBGene00224843	2803.09840925481	5.25327613811837	0.32167195881361	16.3311597240042	5.92473177221612e-60	1.00767461808406e-57	yes	Bm4582	NA
WBGene00222218	3794.28993490475	3.60039728709115	0.220743894564434	16.3102915901495	8.33937026675042e-60	1.3961930063786e-57	yes	Bm1957	NA
WBGene00221322	8067.11504806123	3.72006068983984	0.228357984636383	16.2904778467166	1.1532462711111e-59	1.90108212230083e-57	yes	Bm1061	NA
WBGene00220802	7220.09572419795	3.73306100474054	0.22918767093927	16.2882278503093	1.19646203790748e-59	1.9424379903301e-57	yes	Bm541a	NA
WBGene00228105	57444.7076602892	3.53891264834751	0.218747108493067	16.1781002397098	7.19813574055109e-59	1.15116454417918e-56	yes	Bm7844	NA
WBGene00223999	50079.021947301	3.05755071609602	0.189089881379366	16.1698272471901	8.23288756315783e-59	1.297285150577e-56	yes	Bm3738	NA
WBGene00223060	8933.78593768594	3.25966766132335	0.201711270910223	16.1600670434234	9.6456712758667e-59	1.49787489450597e-56	yes	Bm2799a	Bma-pqn-22
WBGene00220745	4627.4189135493	-3.763873691414	0.233694516387318	-16.1059563981205	2.31687794978126e-58	3.5464781759866e-56	yes	Bm484	NA
WBGene00227390	8009.63444178245	4.0383675611264	0.250927112676586	16.0937872278926	2.82043966193894e-58	4.25648041939095e-56	yes	Bm7129	Bma-lgc-27
WBGene00233566	4764.56254442236	3.57782389956766	0.223709170442292	15.9931928248359	1.42534703511244e-57	2.12119353905969e-55	yes	Bm13305	NA
WBGene00224377	94681.7743225899	3.23675789359584	0.203383669553434	15.9145417166616	5.02334766934599e-57	7.37331099685511e-55	yes	Bm4116	NA
WBGene00222058	217861.704634879	3.59977181218664	0.226729141710439	15.8769701372751	9.14923719279652e-57	1.32478481784885e-54	yes	Bm1797a	Bma-daf-7
WBGene00220740	12304.973435288	3.11675440407669	0.197062092338799	15.8161032752977	2.40951480767829e-56	3.44239348856971e-54	yes	Bm479	NA
WBGene00220713	10477.5328189156	3.25536017005196	0.206085047544944	15.7961977777258	3.30456273215799e-56	4.65899864145695e-54	yes	Bm452	NA
WBGene00223657	5634.04791722873	3.4730618565243	0.220175590418152	15.7740549255635	4.69371136728534e-56	6.53157367538473e-54	yes	Bm3396	NA
WBGene00230224	2257.9327959978	3.53924544085468	0.224491191310493	15.7656316944728	5.36333811526866e-56	7.36771383398765e-54	yes	Bm9963	NA
WBGene00225693	1458.40159945506	3.74270620066915	0.239608870365603	15.6200652962405	5.31511734912429e-55	7.2090484045401e-53	yes	Bm5432a	Bma-dpy-31
WBGene00268912	915.156853225731	5.72601464100386	0.368176897921117	15.5523463675623	1.533819313935e-54	2.05435924360169e-52	yes	Bm17770	NA
WBGene00225737	16131.9319523922	3.28552236629534	0.211933057903469	15.5026421965366	3.32915049950469e-54	4.40393180273984e-52	yes	Bm5476	NA
WBGene00223028	7416.14146054125	3.80008042195772	0.245943799304096	15.451011298964	7.42689854723204e-54	9.70478267482821e-52	yes	Bm2767a	Bma-lec-4
WBGene00222027	18865.2572327231	3.37828065443088	0.218717328691148	15.4458756178454	8.0427924190735e-54	1.03829543096834e-51	yes	Bm1766a	Bma-hpo-28
WBGene00229061	3014.4256186413	3.37757144602491	0.219880848065106	15.3609169500057	2.99311103088358e-53	3.81799817808542e-51	yes	Bm8800	NA
WBGene00225496	34733.8142942137	3.60701814437905	0.23532145103353	15.3280465020807	4.96700806229076e-53	6.26135192793476e-51	yes	Bm5235	Bma-zig-12
WBGene00234347	35282.0799952088	3.08030491806342	0.202177028163115	15.235682045827	2.04976886482881e-52	2.55386899844659e-50	yes	Bm14086	NA
WBGene00221723	50415.3136337937	3.15386872800414	0.207189926816751	15.2221142043917	2.52245773471026e-52	3.10668214108281e-50	yes	Bm1462	Bma-har-1
WBGene00233217	55880.875096223	3.55965290014809	0.234947608949925	15.1508368868175	7.48079143562029e-52	9.10871366280357e-50	yes	Bm12956	NA
WBGene00222423	3108.83405403644	-4.84137390517962	0.319758410429314	-15.1407242070021	8.72476046421045e-52	1.05040234128107e-49	yes	Bm2162a	Bma-rop-1
WBGene00223893	3127.15860309669	3.50850323387276	0.23192455179165	15.1277784381561	1.06221093566998e-51	1.26462113063376e-49	yes	Bm3632	NA
WBGene00229703	8585.4299689469	3.25758405428451	0.215851062379432	15.0918138570854	1.83332236592544e-51	2.15868671987814e-49	yes	Bm9442	NA
WBGene00222121	131669.431515664	3.05317924704255	0.2024805076244	15.0788798529989	2.23020558761647e-51	2.5974622686207e-49	yes	Bm1860a	Bma-tads-1
WBGene00222213	6793.4141652798	3.1683431500574	0.21036580756148	15.0611127672516	2.91833281480857e-51	3.36235872157783e-49	yes	Bm1952	Bma-ikb-1
WBGene00221839	4909.56201686612	3.7063548072328	0.246768430762639	15.0195663026194	5.4664197172399e-51	6.23113694364102e-49	yes	Bm1578	NA
WBGene00229831	6832.30099920607	4.57447163275539	0.304947528263272	15.000848371547	7.2486850488697e-51	8.1757537156462e-49	yes	Bm9570	Bma-lin-32
WBGene00233911	75067.2934927867	3.34874254733753	0.224040813314891	14.9470201334738	1.628759873773e-50	1.81793354661226e-48	yes	Bm13650	Bma-rpl-39
WBGene00229500	158527.844481006	2.84622010091677	0.190832395886869	14.9147637521886	2.64210744647551e-50	2.91857539061702e-48	yes	Bm9239a	Bma-rpl-7A.3
WBGene00227025	5333.63866529353	3.31352131625967	0.222263722427947	14.9080618288207	2.9210919862608e-50	3.19382659518209e-48	yes	Bm6764a	NA
WBGene00268742	4012.65590804509	3.44580591519012	0.231416824152577	14.8900406347217	3.82536964385373e-50	4.14028643776694e-48	yes	Bm17599	NA
WBGene00230510	75387.0819074583	3.68087100596204	0.247219890431648	14.8890568616271	3.88207004191773e-50	4.15963804991484e-48	yes	Bm10249	NA
WBGene00224831	84527.6063612811	2.90604992283856	0.19528985012669	14.8807012804471	4.39864585425952e-50	4.66648419092978e-48	yes	Bm4570	NA
WBGene00230043	3419.03703551471	3.16054595157235	0.212863283066371	14.8477741489446	7.19171035122937e-50	7.55482121700223e-48	yes	Bm9782	NA
WBGene00220555	85297.5035540882	3.73012866736731	0.252726592894511	14.7595416241942	2.67089880807668e-49	2.77851269209142e-47	yes	Bm294a	NA
WBGene00268704	5608.2832376651	3.5509209721456	0.240754053279423	14.7491638199933	3.1150022842352e-49	3.20935091111348e-47	yes	Bm17561	Bma-cal-2
WBGene00234665	3979.53478288345	3.12042433829959	0.212017511932082	14.7177669894513	4.95762003643525e-49	5.05913320860988e-47	yes	Bm14404	NA
WBGene00224974	2272.03663772818	4.27248111144929	0.290477075139141	14.7084967355952	5.68564534103253e-49	5.74732922916637e-47	yes	Bm4713	NA
WBGene00225098	3099.17054488193	4.73328790495913	0.322722630882977	14.6667368569993	1.05288085116955e-48	1.05435685236278e-46	yes	Bm4837	Bma-swt-5
WBGene00222412	12463.9175586407	4.50359662852708	0.307584378676447	14.6418249454225	1.51934713263792e-48	1.5073893079829e-46	yes	Bm2151a	NA
WBGene00230480	10177.1986853192	3.08213947770715	0.210634605832396	14.6326358174954	1.73916683894204e-48	1.70964886965725e-46	yes	Bm10219	NA
WBGene00224725	10020.7109965722	-6.61200569759684	0.453342729447047	-14.5850043865525	3.4989949614377e-48	3.40833918289136e-46	yes	Bm4464	Bma-glb-19
WBGene00222799	13976.357802671	4.03492814276021	0.277186664360219	14.556718130987	5.29389514661157e-48	5.11027806269756e-46	yes	Bm2538	NA
WBGene00227561	4238.15338745423	4.06092564726198	0.27962628155294	14.5226894435999	8.70275894537439e-48	8.32589840175773e-46	yes	Bm7300a	Bma-ssu-1
WBGene00226501	26440.2476548037	3.28708412248574	0.228002022901096	14.4169077127514	4.05089429352749e-47	3.8411798544378e-45	yes	Bm6240a	Bma-mlt-8
WBGene00224213	21489.1834611138	2.81534689583153	0.195448093859155	14.404575865858	4.84281625116906e-47	4.55182246765583e-45	yes	Bm3952a	NA
WBGene00227358	8264.02208264934	3.04902897836213	0.212168785746992	14.37077074098	7.89477330483362e-47	7.35586921402542e-45	yes	Bm7097a	Bma-shl-1
WBGene00233198	1760.88480411579	3.56126011150169	0.248985288158468	14.3030945235411	2.09292116968841e-46	1.93324571838028e-44	yes	Bm12937a	NA
WBGene00224604	135132.922429862	3.64296395678909	0.255329585641244	14.2676922756132	3.47901886584714e-46	3.18612710662839e-44	yes	Bm4343a	Bma-pat-10
WBGene00231160	2909.30521934879	-4.17028427099536	0.292421925689403	-14.2611887298247	3.81893394975139e-46	3.46778620945645e-44	yes	Bm10899	NA
WBGene00229416	1878.33859607982	3.28491579700213	0.230408355935692	14.256929978351	4.05922839337369e-46	3.6550111121848e-44	yes	Bm9155a	NA
WBGene00224214	1767.26911435426	3.2550993213457	0.228971620044854	14.2161693257358	7.27264086382225e-46	6.49386223798795e-44	yes	Bm3953	NA
WBGene00225877	8827.27145339775	2.81558725873808	0.19891199562984	14.1549394737242	1.74087571607679e-45	1.54161018989775e-43	yes	Bm5616	NA
WBGene00225635	4184.37985235588	3.7273083758864	0.263383547361915	14.1516370829523	1.82459677438566e-45	1.60250446209363e-43	yes	Bm5374	NA
WBGene00225047	3862.6877745249	3.70067028490419	0.261830012832428	14.1338658806568	2.34887622668913e-45	2.04619583487594e-43	yes	Bm4786a	Bma-clik-3
WBGene00227911	1449.09001632131	-5.83593250169957	0.413664367346267	-14.1078926839605	3.39574348892843e-45	2.93430576482808e-43	yes	Bm7650	NA
WBGene00227947	724.713732026691	4.92871302313743	0.349459078082695	14.1038345610558	3.5968229050157e-45	3.08319659417945e-43	yes	Bm7686	NA
WBGene00225421	13828.7616128053	3.72467690102426	0.264370289304136	14.0888634302599	4.44660481097175e-45	3.78137861504463e-43	yes	Bm5160a	NA
WBGene00230217	10841.6990187637	4.18110396816894	0.297752454205811	14.0422149645118	8.59826522399226e-45	7.25436313976985e-43	yes	Bm9956	NA
WBGene00231108	5444.71727453414	3.61112430094232	0.257626522464033	14.016896499647	1.2287150516071e-44	1.02826064303557e-42	yes	Bm10847a	NA
WBGene00269035	6072.87156665695	3.96820286531614	0.283112116837654	14.0163653524997	1.23794328466252e-44	1.02826064303557e-42	yes	Bm17893	Bma-acc-1
WBGene00224972	21596.7420632715	3.8423131305287	0.274573746002498	13.9937382450751	1.70223950944679e-44	1.40303818028634e-42	yes	Bm4711	NA
WBGene00268352	743.586124387105	4.10854766492255	0.293769653191621	13.9856095423261	1.90834791509576e-44	1.56091205421764e-42	yes	Bm17209	NA
WBGene00226461	12010.0049443416	4.22196348832148	0.302546127900857	13.9547761447636	2.94224071278e-44	2.38834160889679e-42	yes	Bm6200a	NA
WBGene00221989	31801.2532559636	2.7866160630215	0.199931155173579	13.9378780690892	3.72861566500562e-44	3.00391856019062e-42	yes	Bm1728	Bma-mrpl-47
WBGene00224917	3775.21557839057	3.46588358547848	0.249154776805334	13.9105644688739	5.4646468555815e-44	4.36967843713103e-42	yes	Bm4656a	NA
WBGene00225337	9219.35931158662	2.98811089366787	0.214873851790322	13.9063495570588	5.79631523649978e-44	4.60055687104408e-42	yes	Bm5076a	Bma-gei-15
WBGene00230396	4250.10967514687	3.06602997023432	0.220847477065629	13.8830201321394	8.0288353271415e-44	6.32565959781773e-42	yes	Bm10135a	Bma-aha-1.2
WBGene00224734	1788.58687004831	-6.04568503014908	0.43642894595633	-13.852621569134	1.22652627532214e-43	9.59286791246473e-42	yes	Bm4473	Bma-daz-1
WBGene00229656	13731.6274997385	2.93783336483137	0.212089263743679	13.8518721455976	1.23939177941609e-43	9.62324849017639e-42	yes	Bm9395	NA
WBGene00226908	167786.125222288	2.70910511464246	0.19589646057534	13.8292703537672	1.69733412518902e-43	1.30841260082017e-41	yes	Bm6647	Bma-mrpl-20
WBGene00226562	1059.4564867788	-7.34615760065617	0.531455034837404	-13.8227265132669	1.85893261401838e-43	1.42274735422907e-41	yes	Bm6301a	Bma-mcm-2
WBGene00223709	766.829767807785	-5.42777643697155	0.392951339733719	-13.8128462436332	2.13236918201633e-43	1.62044934647553e-41	yes	Bm3448	NA
WBGene00226904	6127.14175048566	-5.80799425214334	0.421098183823871	-13.7924941860414	2.82810197508756e-43	2.13402201852557e-41	yes	Bm6643	NA
WBGene00227735	6645.14528062694	3.29130873080264	0.238667750508443	13.7903370848849	2.91395157923503e-43	2.18342595604919e-41	yes	Bm7474	Bma-mlt-7
WBGene00234034	4006.51141987427	3.16838670509133	0.229927343945683	13.779947398687	3.36517291835044e-43	2.50401582084201e-41	yes	Bm13773a	Bma-bus-8
WBGene00228010	7867.96691796333	5.84574607694786	0.424258887855656	13.7787238977931	3.42268817856246e-43	2.52924854022736e-41	yes	Bm7749	NA
WBGene00221291	23707.3558402631	2.72288856054482	0.197655251795733	13.7759484547307	3.55680920671332e-43	2.61035689383104e-41	yes	Bm1030a	NA
WBGene00228202	73784.6813323618	4.99218844321037	0.363066038475275	13.7500837703671	5.08705903893508e-43	3.70801616341424e-41	yes	Bm7941a	NA
WBGene00233137	19211.9417833915	2.78514625610265	0.202824911561903	13.7317760163431	6.55077940118107e-43	4.74267576240913e-41	yes	Bm12876	Bma-glrx-10.2
WBGene00268716	3538.28083836144	3.49166397660893	0.254348996921826	13.727846458471	6.91587414631294e-43	4.97339540119082e-41	yes	Bm17573	NA
WBGene00224169	11009.8900532631	3.13043928006826	0.228526499539472	13.6983644626629	1.03836943238545e-42	7.41741897867339e-41	yes	Bm3908	NA
WBGene00225831	49365.474673105	3.14593712765589	0.229911620712487	13.6832454049376	1.27856268000181e-42	9.07271464650294e-41	yes	Bm5570	Bma-tre-2
WBGene00304236	5224.67789377001	2.74413396379068	0.201006585533435	13.6519604892957	1.9651949559383e-42	1.38533315479467e-40	yes	Bm18582a	Bma-arv-1
WBGene00225675	16700.4540428436	2.63282887717675	0.193506633270874	13.6058843703371	3.69471939638226e-42	2.58751100210692e-40	yes	Bm5414a	Bma-gst-1
WBGene00225767	9154.77343542838	2.73235407428777	0.200905774402658	13.6001769108515	3.99466017083712e-42	2.77940154094284e-40	yes	Bm5506	Bma-uba-5
WBGene00220654	1057.31491402704	5.48925588198617	0.404433352151856	13.5727082170144	5.81337200157547e-42	4.01056860372449e-40	yes	Bm393	NA
WBGene00255695	568.219735364312	5.96911931649141	0.439798821847936	13.5723858727281	5.83899862044817e-42	4.01056860372449e-40	yes	NA	NA
WBGene00230941	29680.818972016	2.59452230371055	0.191324435970129	13.5608517048791	6.8337950369599e-42	4.66395629433283e-40	yes	Bm10680	NA
WBGene00231231	1617.403730122	3.22415312004951	0.237828541668308	13.556628222302	7.23878560823298e-42	4.9090878349504e-40	yes	Bm10970	Bma-rps-2.3
WBGene00268950	511.345439234867	5.21068802859598	0.384814282489703	13.5407864668729	8.9822068721616e-42	6.05310356196299e-40	yes	Bm17808	NA
WBGene00223943	9571.11437636165	3.9895912907863	0.294649932807892	13.540105890292	9.06581408443957e-42	6.07126236967312e-40	yes	Bm3682a	Bma-cpn-3
WBGene00223968	73550.6497051369	2.70646336399962	0.200533483766969	13.4963164911884	1.64392170391324e-41	1.09407584207642e-39	yes	Bm3707a	NA
WBGene00225813	10428.8565248251	2.73425864305607	0.203244273344976	13.4530660965541	2.9536618892886e-41	1.95361031751404e-39	yes	Bm5552	NA
WBGene00225833	709.883632185571	5.43998060358316	0.404744811235581	13.4405196869018	3.49970152451609e-41	2.30057066473558e-39	yes	Bm5572	NA
WBGene00224373	174220.06791324	3.08932854034419	0.229885118306992	13.4385755941742	3.59285987696382e-41	2.34740814522362e-39	yes	Bm4112a	NA
WBGene00223115	3734.76818677837	2.97868010340407	0.22183050739607	13.4277297490275	4.15969221890786e-41	2.70127891670289e-39	yes	Bm2854a	NA
WBGene00224576	8931.20669679189	3.32189644774718	0.247472782814567	13.4232799662511	4.41721553803468e-41	2.85123280060491e-39	yes	Bm4315	NA
WBGene00228897	2234.50241493368	-5.99319021081785	0.446693247038969	-13.4167916138096	4.82138729608201e-41	3.09348292679753e-39	yes	Bm8636	NA
WBGene00223204	2658.16151616161	2.825931520722	0.211053424131148	13.3896501909676	6.95073385944012e-41	4.43316150618458e-39	yes	Bm2943a	Bma-lgx-1
WBGene00222590	15916.2514144286	2.96304224461054	0.221578363246573	13.3724349309019	8.76247087985427e-41	5.55561393358808e-39	yes	Bm2329	Bma-cab-1
WBGene00230158	1314.2278432914	3.51027358884535	0.262557668664014	13.3695336598122	9.11102665001044e-41	5.74262650322717e-39	yes	Bm9897	Bma-rab-37
WBGene00228638	14198.6862453836	5.14114552145555	0.384590214150592	13.3678531909875	9.3191871126865e-41	5.83947894224771e-39	yes	Bm8377	NA
WBGene00229742	18632.7873821825	2.58871695470186	0.193886163577649	13.3517364361336	1.1571962559027e-40	7.20892900116131e-39	yes	Bm9481	NA
WBGene00220954	13898.6034496266	2.94414452369148	0.220722878848163	13.3386468093178	1.37940709920652e-40	8.54355321849587e-39	yes	Bm693	NA
WBGene00233110	9920.10154762462	4.13279454418571	0.310332182926158	13.3173250199741	1.83567548920008e-40	1.13041740613672e-38	yes	Bm12849a	NA
WBGene00225264	9523.14719660145	2.66232314763543	0.200445480603132	13.2820313016019	2.94300792099164e-40	1.80196170705288e-38	yes	Bm5003a	Bma-sca-1
WBGene00226876	15102.4959193778	3.22697319484051	0.243183639961806	13.2696969062036	3.46981315387562e-40	2.11244590589644e-38	yes	Bm6615	Bma-scpl-3
WBGene00227360	5757.43945950589	2.82770846141756	0.213104077565119	13.2691429170494	3.49555845270253e-40	2.1160965435428e-38	yes	Bm7099	NA
WBGene00230474	871.458322962692	-4.20931799597227	0.317633190861918	-13.2521352209762	4.38545967298567e-40	2.63989889865401e-38	yes	Bm10213	NA
WBGene00226009	18369.1915507109	4.00388078665931	0.302203343085566	13.2489625884968	4.57483371614025e-40	2.73851079711971e-38	yes	Bm5748	NA
WBGene00229807	3575.55734317519	2.90955433202306	0.21965147492493	13.2462317087443	4.74433750754597e-40	2.82419868851973e-38	yes	Bm9546a	NA
WBGene00224961	9478.36858559145	2.53862154625075	0.193311617814124	13.1322761402355	2.15092745930383e-39	1.27332528875362e-37	yes	Bm4700a	NA
WBGene00226589	2385.99775795146	3.28006894211109	0.249787197786372	13.1314533778322	2.17442764373588e-39	1.28016440673791e-37	yes	Bm6328a	NA
WBGene00228154	12339.8898726184	3.51907138822413	0.268344478059606	13.1140070914463	2.73743909909449e-39	1.60282294791243e-37	yes	Bm7893	NA
WBGene00226480	81211.2982327649	3.15330139330685	0.240549198696201	13.1087586672416	2.93360697485063e-39	1.70834775736546e-37	yes	Bm6219a	Bma-ttn-1.2
WBGene00235663	11651.890652997	2.76006276404113	0.210711721934067	13.0987623218454	3.34670625505277e-39	1.9383760823184e-37	yes	NA	NA
WBGene00228071	63670.7558636422	3.9958605304047	0.305240569963643	13.0908566016655	3.71395534244405e-39	2.13951782227355e-37	yes	Bm7810	NA
WBGene00225650	10554.2076343604	3.3609106664259	0.257326689127855	13.0608709023416	5.50938772372067e-39	3.1568497037255e-37	yes	Bm5389a	NA
WBGene00234307	18736.0964360935	2.64584154149478	0.202707847699458	13.0524869733588	6.15063028384815e-39	3.50553210060813e-37	yes	Bm14046	Bma-rps-18
WBGene00229645	10041.6731187917	2.92811809578451	0.225034599220263	13.0118573140768	1.04764433250486e-38	5.93942276338075e-37	yes	Bm9384	NA
WBGene00220688	93662.8306617509	2.60325241614996	0.200094710947065	13.0101010857735	1.07200189650006e-38	6.04552648473585e-37	yes	Bm427	NA
WBGene00234211	34364.2399969804	2.48742834793951	0.191344580581258	12.9997324219129	1.22772095566381e-38	6.88745028268992e-37	yes	Bm13950	Bma-sars-2
WBGene00222657	1188.27142441529	3.43470484071481	0.264232335092776	12.9988059164251	1.24268444833946e-38	6.93508534581109e-37	yes	Bm2396a	NA
WBGene00268934	2439.60395136748	-6.75008436912721	0.519677785790304	-12.9889800058742	1.4129761698405e-38	7.84458013463262e-37	yes	Bm17792	NA
WBGene00269088	1517.2153229496	3.8161290122239	0.294352396052875	12.9644910773494	1.9451711223425e-38	1.06884659363589e-36	yes	Bm17946	NA
WBGene00234089	18821.4216732456	2.48179375108031	0.191426913909122	12.9647064793539	1.93971475877793e-38	1.06884659363589e-36	yes	Bm13828	Bma-vps-45
WBGene00225256	5600.97236161196	3.01498423543626	0.232598743613095	12.9621690495946	2.00496823512357e-38	1.09608339996679e-36	yes	Bm4995a	Bma-mrps-27
WBGene00227282	799.839728792122	3.57409571996196	0.276077115273872	12.9460050189832	2.47502828482108e-38	1.34618924222629e-36	yes	Bm7021a	NA
WBGene00229787	2313.8473930242	2.9957299665164	0.231788923062234	12.9243879601273	3.27895411996119e-38	1.77444411087799e-36	yes	Bm9526	NA
WBGene00220387	196450.319980906	2.66999607011637	0.206880778465802	12.90596492297	4.16564503122986e-38	2.24295912108683e-36	yes	Bm126	Bma-ctc-1.2
WBGene00230508	2668.8948317509	2.81397935395077	0.218255122006847	12.8930736107191	4.92414453798135e-38	2.63811043622351e-36	yes	Bm10247	NA
WBGene00224366	6990.36427818998	2.83707940946635	0.220561597842109	12.8629799440304	7.2718233415982e-38	3.8764968709067e-36	yes	Bm4105a	Bma-cima-1
WBGene00230930	56153.081553057	3.43578829544539	0.267126615373131	12.862021594689	7.36255828466302e-38	3.905436238622e-36	yes	Bm10669a	NA
WBGene00230230	3162.6059684955	3.196268194905	0.248759779397572	12.8488142361498	8.73387272656346e-38	4.61002198350381e-36	yes	Bm9969	NA
WBGene00227765	5257.41933888873	3.22767912633717	0.25135835666297	12.8409461662138	9.66855274681567e-38	5.07835993539852e-36	yes	Bm7504a	Bma-mcm-6
WBGene00230800	33340.6830414359	2.96139992811319	0.230829929146076	12.8293585631139	1.12289969483353e-37	5.86920499031283e-36	yes	NA	NA
WBGene00226961	11748.0980493401	2.81722243235888	0.219759524116543	12.8195692254268	1.2740638598331e-37	6.62698750393769e-36	yes	Bm6700	NA
WBGene00227659	1539.75448983361	3.26336009350582	0.254767857404792	12.8091515419105	1.45719155200845e-37	7.54290216414036e-36	yes	Bm7398	NA
WBGene00228567	1540.30807580441	-4.99385062590892	0.390899150246127	-12.7752915880338	2.25301774056467e-37	1.16062909087262e-35	yes	Bm8306	NA
WBGene00233153	14771.9167260974	-4.04411644839153	0.316644919842165	-12.771771138496	2.35728712387079e-37	1.20853260919979e-35	yes	Bm12892a	NA
WBGene00223220	7528.05933771929	2.9717310591426	0.233332229045695	12.7360505288818	3.72794163026994e-37	1.90213783658774e-35	yes	Bm2959a	NA
WBGene00221851	1496.18840795145	3.31761886133111	0.260820931510512	12.7199103312665	4.58385915716563e-37	2.32777492270283e-35	yes	Bm1590	NA
WBGene00230317	52702.0778768869	2.43372660011237	0.191388248123905	12.7161757525299	4.80822458979984e-37	2.43019464526912e-35	yes	Bm10056	NA
WBGene00229106	22159.7105017197	3.72666163275713	0.293174713044553	12.711401996634	5.11098120642822e-37	2.57108749421964e-35	yes	Bm8845a	NA
WBGene00233235	946.75905988433	-4.53858287569694	0.357119783560431	-12.7088531205075	5.28031667990013e-37	2.6438594965014e-35	yes	Bm12974a	NA
WBGene00228533	3549.67726367552	3.28395894073493	0.25847467665354	12.7051476889427	5.53648096561154e-37	2.75922760681524e-35	yes	Bm8272a	NA
WBGene00223112	24601.5596796923	2.61317991645574	0.205866705456825	12.6935529018984	6.42057316488379e-37	3.18502043804304e-35	yes	Bm2851a	NA
WBGene00269335	12409.1261314326	2.90101331283159	0.228849381407096	12.6765180442897	7.97986807525041e-37	3.9371115951461e-35	yes	Bm18192	NA
WBGene00222417	6229.00319692044	2.62039300195618	0.206717209965074	12.676220825537	8.01017571387633e-37	3.9371115951461e-35	yes	Bm2156	Bma-prx-1
WBGene00227700	4624.21358807703	2.86072752453067	0.226175972956232	12.648237950033	1.14412070376737e-36	5.59783257573855e-35	yes	Bm7439a	Bma-nol-16
WBGene00227180	3369.44016626222	2.66303245360629	0.210581315373007	12.6461003859208	1.17566917682019e-36	5.72604328619468e-35	yes	Bm6919a	NA
WBGene00230461	8482.13991352543	3.22814189038277	0.255385252035734	12.640283119916	1.26597279334519e-36	6.13796311343606e-35	yes	Bm10200	NA
WBGene00234040	14364.988754322	2.6535382353125	0.210063944294785	12.6320499418442	1.40567875012836e-36	6.78461612956099e-35	yes	Bm13779a	Bma-rpl-32
WBGene00227595	15530.054648746	2.55391194507468	0.202222265811732	12.6292321709636	1.45692916936155e-36	7.00044665906234e-35	yes	Bm7334a	Bma-lfi-1.1
WBGene00227801	12655.8283231025	3.1600436158755	0.250522043801159	12.6138345669239	1.77158987184985e-36	8.47436851646034e-35	yes	Bm7540	NA
WBGene00223988	1904.05498360652	3.03522173031061	0.241285333797521	12.5793875762779	2.74146901912729e-36	1.30554846844217e-34	yes	Bm3727a	Bma-twk-35
WBGene00223221	14850.1786806386	3.01648911986912	0.239840017211172	12.5770884898378	2.82241503449177e-36	1.33814942896369e-34	yes	Bm2960	Bma-perm-5
WBGene00268627	3470.39941222781	3.94525453156421	0.313806837665888	12.5722388999208	3.00103073775467e-36	1.41656583061856e-34	yes	Bm17484a	NA
WBGene00231139	1350.85327452949	3.24173911143657	0.258737778114502	12.5290521355639	5.17777909050115e-36	2.4333290769614e-34	yes	Bm10878	NA
WBGene00269268	865.783826992252	-3.69544592833486	0.29522716525725	-12.5172963846833	6.00458081713614e-36	2.80956696312724e-34	yes	Bm18128	NA
WBGene00223446	13239.8106003057	2.74248193314286	0.219193174182475	12.5117122983939	6.44204092860568e-36	3.00115080652217e-34	yes	Bm3185a	Bma-calu-2
WBGene00230209	501.766977679789	4.27393034507616	0.341678648422581	12.5086257651963	6.69728433825947e-36	3.10655418547403e-34	yes	Bm9948	NA
WBGene00229316	1708.45093805172	-5.57809309663374	0.446085226667998	-12.5045456858074	7.0501731350971e-36	3.25614677338644e-34	yes	Bm9055	NA
WBGene00234039	4161.21217907678	2.5700358779055	0.205598750492119	12.5002504721156	7.44164506919865e-36	3.42219858010573e-34	yes	Bm13778	NA
WBGene00229551	13592.2471065862	5.62947787574049	0.450711686358481	12.4901972727261	8.44439987759912e-36	3.86674122600319e-34	yes	Bm9290a	NA
WBGene00227848	36832.7158177126	2.84751548773702	0.22913798708647	12.4270773429743	1.86322675784598e-35	8.49552115332753e-34	yes	Bm7587	NA
WBGene00233147	4624.7601187716	2.70480443828044	0.217709949593917	12.4238898742367	1.93899335206501e-35	8.7854744075214e-34	yes	Bm12886	Bma-mrpl-55
WBGene00227253	5010.38408424382	2.5402143521709	0.204464943221777	12.4237158318901	1.94321739111766e-35	8.7854744075214e-34	yes	Bm6992	Bma-ssu-2
WBGene00221982	17102.5185220499	4.47513627228883	0.360280180896546	12.421266862786	2.00363295427486e-35	9.02055760716604e-34	yes	Bm1721	Bma-ida-1
WBGene00227477	1631.64152104869	2.83827416351792	0.22859389339924	12.4162291534222	2.13384306291033e-35	9.56658092848709e-34	yes	Bm7216	NA
WBGene00231041	1988.18902178496	3.16512974297101	0.254954261300274	12.4145002591004	2.1804405989051e-35	9.73475875719508e-34	yes	Bm10780	NA
WBGene00227356	10927.6130631834	2.56669830900971	0.206792365426225	12.4119587477005	2.25078151809989e-35	1.00071053802657e-33	yes	Bm7095	Bma-sqd-1
WBGene00230944	11360.9274691347	2.91287467978975	0.235219671775194	12.3836355089113	3.2048939524555e-35	1.41902639258515e-33	yes	Bm10683	NA
WBGene00222175	5445.62579571317	2.48219816885361	0.200712386834364	12.3669406158874	3.94565547725256e-35	1.73982298101898e-33	yes	Bm1914a	NA
WBGene00220986	5598.72123686679	3.1461792387875	0.256094558789263	12.2852248546853	1.0874225119776e-34	4.77530008845901e-33	yes	Bm725a	NA
WBGene00225134	307.414206981673	5.12309245785203	0.417226743131199	12.2789167813268	1.17561737811642e-34	5.14152661490508e-33	yes	Bm4873	Bma-pax-1
WBGene00229173	604.909579570589	5.7893496485227	0.471514468948435	12.2782014758402	1.18605641464229e-34	5.16609531824882e-33	yes	Bm8912	NA
WBGene00226232	10939.7379065529	4.71030546648564	0.383697998313223	12.2760751611753	1.2176343189866e-34	5.26086763223443e-33	yes	Bm5971	Bma-snt-4
WBGene00231168	2401.95566830956	3.1384727558657	0.255655273261895	12.276190183062	1.21590495733989e-34	5.26086763223443e-33	yes	Bm10907	NA
WBGene00233649	6137.05737910621	3.77313626797029	0.308093327164133	12.2467315430048	1.74903844302681e-34	7.52648470563547e-33	yes	Bm13388a	NA
WBGene00268861	4889.2641150414	4.97526884172454	0.406639198998053	12.2350940440161	2.01870901464309e-34	8.65218683676028e-33	yes	Bm17719	NA
WBGene00224048	5738.18970836642	2.95174905600794	0.2413517430232	12.2300714261848	2.14749720630457e-34	9.16750301416474e-33	yes	Bm3787a	Bma-nhr-8
WBGene00223796	5255.30150614839	3.38948597690289	0.277274175735417	12.2243117950416	2.30525693324824e-34	9.8019158887916e-33	yes	Bm3535	NA
WBGene00226021	9679.11158058015	2.40172191310594	0.19668042125084	12.2112912807058	2.70560643087238e-34	1.14587244690899e-32	yes	Bm5760	NA
WBGene00224702	4525.08718578661	2.53937857169954	0.208316497705404	12.1900022305995	3.51411766733635e-34	1.48243192147673e-32	yes	Bm4441a	NA
WBGene00220594	8143.99252205801	4.15254683994667	0.341155350783339	12.1720114616753	4.38150309548472e-34	1.8410904183576e-32	yes	Bm333a	NA
WBGene00228639	4632.7572049137	-6.65879884647207	0.547198491360356	-12.1688910909057	4.55224809136622e-34	1.90536477730426e-32	yes	Bm8378	NA
WBGene00234280	25975.9463090479	2.30551983856527	0.189688880552597	12.1542171151461	5.44811863322657e-34	2.27146269085691e-32	yes	Bm14019	NA
WBGene00227730	24533.795577135	2.49924269332163	0.205735556928198	12.1478403181122	5.89009957635308e-34	2.44621771165206e-32	yes	Bm7469	NA
WBGene00223939	3738.26815145846	2.53252463778494	0.208800893318437	12.1288975230707	7.42421987455129e-34	3.07144849250259e-32	yes	Bm3678a	NA
WBGene00230810	752.665318172481	3.62689892322837	0.299220703091708	12.1211496589418	8.16062887286855e-34	3.36312070664564e-32	yes	Bm10549	NA
WBGene00268521	5783.87715890981	3.20680424172286	0.264585344973215	12.1201128582821	8.26452555597482e-34	3.39288855679196e-32	yes	Bm17378	NA
WBGene00231170	3662.22307241451	3.3663631099529	0.277922339645004	12.112603521735	9.05728798699956e-34	3.704154228271e-32	yes	Bm10909	NA
WBGene00223323	26497.1773059348	2.29274019891862	0.189297005457235	12.1118672394244	9.13897054441202e-34	3.7233486457557e-32	yes	Bm3062a	Bma-ppfr-2
WBGene00222162	1010.74066675143	4.02873867639441	0.33267448811937	12.110152176589	9.33208659530388e-34	3.7876252980561e-32	yes	Bm1901a	Bma-hlh-8
WBGene00223293	47891.1741117585	2.42293217912617	0.200204635017055	12.1022781461566	1.0272035111458e-33	4.15339080072725e-32	yes	Bm3032	Bma-eat-3
WBGene00227644	17426.4376252562	2.3248730252325	0.192342251329149	12.0871675836529	1.23470362868117e-33	4.97362758696191e-32	yes	Bm7383	Bma-mrpl-42
WBGene00222286	15218.2722311523	2.3557321539396	0.19500667134672	12.0802644220881	1.3428718828582e-33	5.38909072090847e-32	yes	Bm2025a	Bma-trxr-1
WBGene00222012	1556.68724116356	-5.29672935512209	0.438911071845188	-12.0678873122398	1.56090249137635e-33	6.24069783399162e-32	yes	Bm1751a	Bma-cyp-23A1
WBGene00222197	19197.8452533739	2.36327676829736	0.195930984901904	12.061781700738	1.68106363181249e-33	6.69613264493339e-32	yes	Bm1936a	NA
WBGene00234268	101693.348728702	2.5077055382586	0.208229896775965	12.0429658617016	2.1122265224972e-33	8.3824100698361e-32	yes	Bm14007a	NA
WBGene00225289	7988.01041875517	2.81296283960847	0.233686909021082	12.0373145906718	2.26199646960626e-33	8.94365024790814e-32	yes	Bm5028a	Bma-tra-3
WBGene00234156	46593.6661123529	2.44465207333375	0.203227346623016	12.0291491964836	2.49720824172954e-33	9.83734790813679e-32	yes	Bm13895a	Bma-tct-1
WBGene00227124	27178.9785520278	2.48183402425259	0.206535200955408	12.0165183115126	2.90975519508938e-33	1.13891197383347e-31	yes	Bm6863	NA
WBGene00229455	1859.18958792881	3.71602282540752	0.309244808336205	12.016443688741	2.91238339552376e-33	1.13891197383347e-31	yes	Bm9194	NA
WBGene00226625	6000.79612080616	2.96317607322953	0.246601333500401	12.0160585961499	2.92598381132309e-33	1.1400696923028e-31	yes	Bm6364a	Bma-npr-23
WBGene00224622	56415.9621624016	2.45115356200801	0.20405152168862	12.0124248117514	3.0574656006677e-33	1.18698347504183e-31	yes	Bm4361	Bma-gtf-2E2
WBGene00224434	6227.77017182051	3.75266344753944	0.312540427219731	12.0069697252354	3.26594256344328e-33	1.2633420421406e-31	yes	Bm4173a	NA
WBGene00223342	19769.8217484573	2.29419499732846	0.191297102247539	11.9928371646726	3.87404691993606e-33	1.49318031464442e-31	yes	Bm3081a	NA
WBGene00230841	7904.38143847654	2.34088131572153	0.195908601590173	11.9488439850052	6.58346011673947e-33	2.52837903766535e-31	yes	Bm10580a	NA
WBGene00223686	3580.31792289591	-4.10949580879813	0.344068065507118	-11.9438454793565	6.99144373031933e-33	2.67547569894185e-31	yes	Bm3425	NA
WBGene00222349	14927.099165103	2.37721473068115	0.199303686673313	11.9276003889368	8.49881340117963e-33	3.24073970084127e-31	yes	Bm2088a	Bma-hsp-25
WBGene00230201	967.509319063044	-3.96336009727143	0.332531485937267	-11.9187513510198	9.4514414910245e-33	3.59121260908963e-31	yes	Bm9940	NA
WBGene00225967	7389.69873511441	2.39222504603314	0.200790278478003	11.9140481509677	1.00001669793335e-32	3.78628230330596e-31	yes	Bm5706	Bma-pcbd-1
WBGene00226808	5132.26278184312	2.73405413018838	0.229622664101589	11.9067259361593	1.09180633073591e-32	4.11926226543495e-31	yes	Bm6547	Bma-dyf-19
WBGene00225193	30011.1691327079	2.28954595968968	0.192592588112577	11.8880273749234	1.36594640913106e-32	5.13547921889097e-31	yes	Bm4932a	Bma-cif-1
WBGene00234979	7138.07972665031	2.70070433502217	0.227551606299099	11.8685355772541	1.72459988385417e-32	6.46121949492917e-31	yes	Bm14794	NA
WBGene00226825	9859.53361242578	3.01773729723032	0.254436387969416	11.8604784532355	1.89886938527516e-32	7.08933291401509e-31	yes	Bm6564	Bma-qui-1
WBGene00226216	790.829650138124	-3.89863443968006	0.329672892478959	-11.8257658685992	2.87270669897472e-32	1.06878653748313e-30	yes	Bm5955	NA
WBGene00225386	6163.89743118937	2.40755151616366	0.203932872698147	11.8056078174665	3.65142805555533e-32	1.35380801436939e-30	yes	Bm5125	NA
WBGene00222051	1531.03758813673	3.82599281563756	0.325019956629215	11.7715627536136	5.47016787949497e-32	2.02113271823409e-30	yes	Bm1790a	Bma-ubc-17
WBGene00221358	6961.50216519294	3.11097981924455	0.264849972338545	11.7461965042909	7.38695087960191e-32	2.71997177577094e-30	yes	Bm1097a	NA
WBGene00223251	6470.77146322413	3.36391436028621	0.286867161125991	11.7263835535668	9.3363006364018e-32	3.42597470270703e-30	yes	Bm2990	NA
WBGene00227498	16226.6724816905	2.45836169864089	0.209682911446714	11.7241871627943	9.58163355671558e-32	3.50400012150879e-30	yes	Bm7237a	Bma-rps-20
WBGene00231314	1369.42823441633	-5.43235114004143	0.464150717782566	-11.703851641109	1.21796967204836e-31	4.43896089659803e-30	yes	Bm11053	NA
WBGene00234107	16239.8162226764	2.55129221620347	0.218269841459652	11.6887069653876	1.45586202473762e-31	5.28798698137748e-30	yes	Bm13846	NA
WBGene00224096	5251.84947537978	2.38590254838909	0.204125906263848	11.6883868003757	1.46135991394818e-31	5.29002414795769e-30	yes	Bm3835	Bma-fem-1
WBGene00224289	12826.9127877377	2.78014322928099	0.23804409850023	11.6791100758094	1.6299300885505e-31	5.88037067300289e-30	yes	Bm4028a	Bma-zyx-1
WBGene00226815	1428.86257158867	2.94600578154063	0.252588041936067	11.6632828654901	1.96324060784983e-31	7.05910171580904e-30	yes	Bm6554a	NA
WBGene00227313	39089.958151404	4.03143812935417	0.345681200587063	11.6623007629795	1.98602181433125e-31	7.11713168580581e-30	yes	Bm7052	Bma-pghm-1
WBGene00268527	3944.54378783743	2.41306501196791	0.206935972076038	11.6609257818222	2.01835794280682e-31	7.20890178572501e-30	yes	Bm17384	NA
WBGene00231313	2390.78278105664	2.7060567765021	0.232089120328812	11.6595589343796	2.05102078353857e-31	7.3012251480451e-30	yes	Bm11052a	NA
WBGene00221325	1626.31771998599	2.89284215508468	0.248146951293264	11.6577783446788	2.09435886522115e-31	7.43081299365715e-30	yes	Bm1064	NA
WBGene00223970	1819.37118888213	3.06952910343525	0.263580371416815	11.6455147511012	2.41856911413406e-31	8.5527947385962e-30	yes	Bm3709a	NA
WBGene00233212	4237.40317250179	2.42299540913582	0.20810904562864	11.6429125020329	2.4935254017014e-31	8.78885680237846e-30	yes	Bm12951	NA
WBGene00225903	2388.02500891141	2.83195142819203	0.243486428631965	11.63083891001	2.8726046592028e-31	1.0091789810937e-29	yes	Bm5642a	NA
WBGene00228973	4580.61116855002	-6.0869900439442	0.523531438528894	-11.626789904057	3.0121301579681e-31	1.05473773341922e-29	yes	Bm8712a	Bma-shp-2
WBGene00226572	4099.10001601183	2.88607246904501	0.248470134924466	11.6153696697689	3.44296029082125e-31	1.20167164547719e-29	yes	Bm6311a	NA
WBGene00224153	45706.3989656419	2.46943110127227	0.212839149348178	11.6023349502896	4.00986082356902e-31	1.39498891962799e-29	yes	Bm3892	NA
WBGene00220503	4892.01584060506	2.68073702228858	0.23127961602648	11.5908918751476	4.58334946337645e-31	1.58933946602196e-29	yes	Bm242a	NA
WBGene00220619	3009.19211550492	2.60976600387436	0.225572480313886	11.569523020906	5.88086913891539e-31	2.03269396204769e-29	yes	Bm358	NA
WBGene00233677	538.567806538246	3.5302979859979	0.305277088825	11.5642415209929	6.25414893490504e-31	2.1547654610131e-29	yes	Bm13416	NA
WBGene00233144	4821.53934532062	2.84557495821011	0.246076007744079	11.5638049572452	6.28603630389869e-31	2.15881022423957e-29	yes	Bm12883a	NA
WBGene00224233	6584.67402150879	3.25000023686844	0.281138290441087	11.5601479676404	6.55956619304509e-31	2.24555117439227e-29	yes	Bm3972a	NA
WBGene00233991	3445.45864767978	2.8397973495922	0.245952111097187	11.5461393558442	7.72114747616505e-31	2.63478010213721e-29	yes	Bm13730	NA
WBGene00223631	30588.980063261	2.42471042152479	0.21005863702685	11.5430170158386	8.00667551668706e-31	2.72354057654927e-29	yes	Bm3370a	Bma-git-1
WBGene00230938	870.339830130125	4.76079508140718	0.412678762514985	11.5363219866065	8.65472859185858e-31	2.93466509056217e-29	yes	Bm10677	NA
WBGene00223314	9518.65463821895	2.25436117467339	0.19546015023779	11.5336101600802	8.93180359528635e-31	3.0190623193531e-29	yes	Bm3053a	Bma-atg-10
WBGene00225511	904.167218646283	-4.7984292803042	0.416528319427102	-11.5200553155762	1.04543863765398e-30	3.51513759122147e-29	yes	Bm5250	NA
WBGene00223467	67768.9221154372	2.29941822909847	0.199602838844634	11.5199675636291	1.04650386523532e-30	3.51513759122147e-29	yes	Bm3206a	NA
WBGene00233267	3679.25100101622	3.09807469828084	0.268957405278742	11.5188302589031	1.06040755261392e-30	3.55070841445567e-29	yes	Bm13006	Bma-pes-4
WBGene00226544	3445.44330241104	2.50074290228408	0.217518621466519	11.4966842168453	1.37080891569217e-30	4.57576870144598e-29	yes	Bm6283	Bma-ttr-36.1
WBGene00233980	31662.3052692796	2.31496204554613	0.201591514696042	11.4834299897821	1.59812254668371e-30	5.31797611419749e-29	yes	Bm13719	Bma-rps-13
WBGene00226537	280.272611769674	4.52414711028785	0.395570356392289	11.4370226109694	2.73097472904489e-30	9.05956477452508e-29	yes	Bm6276	Bma-lgc-45
WBGene00269037	4655.68866059456	2.46992238371391	0.215983553908656	11.4356965565929	2.77302301319903e-30	9.17066098346531e-29	yes	Bm17895	NA
WBGene00226121	1412.05846235826	2.9259613787069	0.25629863987357	11.4162189083417	3.47004779659555e-30	1.14404806586219e-28	yes	Bm5860	NA
WBGene00224403	4588.01877552705	3.35837887215514	0.294184981636269	11.4158746428037	3.48381594831092e-30	1.14506404558747e-28	yes	Bm4142a	Bma-ceh-14
WBGene00225649	8160.87616669515	3.28480349848387	0.28802412638227	11.404612314054	3.96539934943821e-30	1.29936556664313e-28	yes	Bm5388a	NA
WBGene00233166	6759.75703910947	2.3956967251853	0.210095713683548	11.4028824443023	4.04500590937726e-30	1.32140970484687e-28	yes	Bm12905	NA
WBGene00230520	434.474564881527	-4.73355365805321	0.415143308476653	-11.4022159610924	4.07609818244828e-30	1.32751951443566e-28	yes	Bm10259a	NA
WBGene00234119	19903.411411861	2.31844814277813	0.203484102033266	11.3937556772819	4.49201622442103e-30	1.45854405589913e-28	yes	Bm13858a	Bma-arx-3
WBGene00225097	7387.24552475446	3.56183602446307	0.312668948419222	11.3917165182883	4.59840534479481e-30	1.48857744016545e-28	yes	Bm4836	Bma-gsnl-1
WBGene00228346	2850.94589896889	2.62017525228275	0.230231635331941	11.3806047918005	5.22362118279002e-30	1.68587653534925e-28	yes	Bm8085	NA
WBGene00221945	20846.0164036595	2.49623981764985	0.219410775164648	11.3770156264051	5.44306345576801e-30	1.75142417202865e-28	yes	Bm1684	Bma-crm-1
WBGene00222710	2121.22000339317	2.56844265037392	0.225942992171923	11.3676579462998	6.05916083347777e-30	1.94382959073995e-28	yes	Bm2449	Bma-cka-1.2
WBGene00268573	1285.76494399784	3.61164560145117	0.31825258421012	11.3483622149213	7.556483373133e-30	2.41694684606329e-28	yes	Bm17430	NA
WBGene00231288	1882.31806924627	2.73444882387958	0.241450057701678	11.3251114947262	9.85533954983578e-30	3.14285604989555e-28	yes	Bm11027	NA
WBGene00234218	21652.0678964368	2.15629280507336	0.19083440305215	11.2992876053072	1.32286755207033e-29	4.20609074790315e-28	yes	Bm13957	Bma-algn-6
WBGene00225072	9383.37752635487	2.37158815804703	0.210142071423919	11.2856418611332	1.54509592802325e-29	4.89813694342282e-28	yes	Bm4811	Bma-ath-1
WBGene00268841	12512.2833609278	2.52235381625217	0.223925811494546	11.2642388093505	1.97047309016639e-29	6.22820624222208e-28	yes	Bm17699	Bma-blos-7
WBGene00233929	121244.448899015	2.39143962316854	0.21237051669088	11.2606950363522	2.05134395139318e-29	6.46475012916999e-28	yes	Bm13668	Bma-pbs-5
WBGene00225229	1647.68382927545	-4.32301050128472	0.38436571462769	-11.2471282863305	2.39255386641512e-29	7.51795151866216e-28	yes	Bm4968a	NA
WBGene00236801	26747.9088028479	2.24712040372461	0.199994270974783	11.2359238730791	2.7163731159761e-29	8.51050816891344e-28	yes	Bm16889	NA
WBGene00225444	11436.8858600539	2.61600163898336	0.232965983496374	11.2291142239831	2.93405106663169e-29	9.16570180144564e-28	yes	Bm5183a	Bma-osg-1
WBGene00226629	1507.42494234775	2.96910781497608	0.264582945435511	11.2218412645186	3.1856760574273e-29	9.92282527771323e-28	yes	Bm6368a	NA
WBGene00234210	54061.3518995578	2.23214500239381	0.199050607062482	11.2139572711433	3.48266716715526e-29	1.08164575930634e-27	yes	Bm13949	Bma-lpd-7
WBGene00222601	7242.22280653608	2.80385246033825	0.250265762504549	11.2034999605161	3.91936735864613e-29	1.21375783953449e-27	yes	Bm2340a	NA
WBGene00227764	1012.49577593462	4.27394966005665	0.381712438431136	11.1967785949624	4.22830578850689e-29	1.30565696034154e-27	yes	Bm7503	NA
WBGene00220891	1328.86562990547	2.63141275663798	0.235062747524516	11.1945120371042	4.33783904959935e-29	1.33563061541543e-27	yes	Bm630a	NA
WBGene00227397	7757.28021803766	2.43961259326294	0.218255990094631	11.1777577889394	5.2397108920408e-29	1.60869633834433e-27	yes	Bm7136	Bma-gly-11
WBGene00223541	352.344328139654	-5.29456455449144	0.474102794773388	-11.1675455467883	5.87827938001624e-29	1.79959324448212e-27	yes	Bm3280	Bma-lips-3
WBGene00225712	3636.45338972192	2.8025275570059	0.251113988696426	11.1603800790003	6.37185759016141e-29	1.94514114183987e-27	yes	Bm5451	NA
WBGene00233200	12642.757776072	2.18394505629624	0.195714476249801	11.1588324897784	6.48374362872186e-29	1.9736736642544e-27	yes	Bm12939a	NA
WBGene00230237	544.862654574784	9.05592287315344	0.811741116255109	11.1561712124822	6.6807222498798e-29	2.02787362344085e-27	yes	Bm9976	NA
WBGene00222038	7877.75244768335	2.41028417144215	0.21623145508162	11.1467786707181	7.42457938412806e-29	2.24729853392464e-27	yes	Bm1777a	NA
WBGene00229195	2767.67759889487	2.75325590383178	0.247223807332705	11.1366940487513	8.31488537589562e-29	2.50969005078089e-27	yes	Bm8934	NA
WBGene00230687	2850.41090460848	2.63265722757528	0.236462964936555	11.1334864987489	8.61967408260969e-29	2.59437662345963e-27	yes	Bm10426a	NA
WBGene00231888	67914.7537157165	3.24483938020255	0.292335142266072	11.099723950565	1.25831931801374e-28	3.77672030602724e-27	yes	Bm11627	Bma-lfi-1.2
WBGene00227164	7972.92494532945	2.55572492533127	0.230300446695163	11.0973511428493	1.29216887863963e-28	3.86748311023006e-27	yes	Bm6903a	NA
WBGene00222671	74481.5696429487	2.60567524394851	0.235260425858758	11.0757057181936	1.64578353306848e-28	4.91213664535621e-27	yes	Bm2410	Bma-rps-30
WBGene00234029	45536.8259123205	2.16711024894946	0.196021218423897	11.0554881067165	2.06212065861171e-28	6.13767301584014e-27	yes	Bm13768	Bma-rla-0
WBGene00227157	7108.01899756406	2.47965417970657	0.224762874746351	11.0323120867043	2.66913381327303e-28	7.92237363136301e-27	yes	Bm6896	Bma-daf-22
WBGene00222464	26043.0334901803	3.22368046251639	0.2924949376779	11.0213205333022	3.01601640020809e-28	8.9272419138756e-27	yes	Bm2203a	NA
WBGene00227621	7526.65581671985	2.59459974218015	0.235485833231797	11.0180714761987	3.12686430525557e-28	9.22984876881914e-27	yes	Bm7360a	NA
WBGene00226497	966.9602502175	-6.97990836107898	0.633528416948525	-11.0175142493191	3.14627705838048e-28	9.26163700015023e-27	yes	Bm6236a	NA
WBGene00220669	22007.111254315	2.4478731414891	0.222204254541486	11.0163198564322	3.18829117799468e-28	9.35959999238713e-27	yes	Bm408	Bma-rpl-33.2
WBGene00234943	31930.6679271742	2.13264105914033	0.193878091226807	10.999907445166	3.82524328552519e-28	1.11987655203285e-26	yes	Bm14758	NA
WBGene00220794	765.262658200368	3.04271521594754	0.277209848686152	10.9762161422786	4.97320919253669e-28	1.45198737051855e-26	yes	Bm533a	NA
WBGene00222013	1477.77511586974	2.56005888359652	0.233459456461651	10.9657536361867	5.58334337223167e-28	1.62569359330061e-26	yes	Bm1752a	NA
WBGene00221783	1779.01693520059	2.66336589175896	0.243013253028482	10.9597557275891	5.96601820449068e-28	1.73240880924438e-26	yes	Bm1522	NA
WBGene00224314	1789.89813328848	2.93178223040142	0.267562006087924	10.9573936646222	6.12376238764693e-28	1.77340848604424e-26	yes	Bm4053	NA
WBGene00223958	6524.64175988729	2.2268765977104	0.20353229852333	10.9411460189211	7.3267838525477e-28	2.11607787008217e-26	yes	Bm3697	Bma-twk-12
WBGene00233229	926.716317499322	2.82524286026411	0.25849717369808	10.9294922642518	8.33132709402925e-28	2.39973574764848e-26	yes	Bm12968	NA
WBGene00230858	4215.03859947145	2.56049470414631	0.234829675533489	10.9036249287035	1.10755103865855e-27	3.18161109362636e-26	yes	Bm10597a	Bma-hsp-17.2
WBGene00222327	9397.76177506142	2.63106288872053	0.241544033971807	10.8926842259645	1.24903648970559e-27	3.57845614630892e-26	yes	Bm2066a	Bma-nrf-6
WBGene00225748	13088.0660997317	2.54437616226039	0.233782669197969	10.8835106168875	1.38138204742617e-27	3.94706897017903e-26	yes	Bm5487	Bma-mei-1
WBGene00227883	13813.8483567092	2.25123754670684	0.20689596342632	10.8810124152497	1.41977216106648e-27	4.04597306006045e-26	yes	Bm7622	Bma-mrps-23
WBGene00223641	2469.03530470964	2.42409785808976	0.22286877619781	10.8767944054138	1.48700668461043e-27	4.22633332244051e-26	yes	Bm3380a	Bma-sad-1
WBGene00229312	723.296114409883	-4.98136585536565	0.458342793059079	-10.8682102801681	1.63374150337302e-27	4.63109529329152e-26	yes	Bm9051	NA
WBGene00226649	8404.78980529004	-4.63517825619138	0.426655933188222	-10.8639723384476	1.71139070773998e-27	4.83840407214614e-26	yes	Bm6388a	NA
WBGene00225173	6651.35023264176	3.39775690972453	0.313318807588089	10.844407764348	2.1200444169162e-27	5.97796734927817e-26	yes	Bm4912	NA
WBGene00225336	4541.5083945272	3.30718258381513	0.305030519305341	10.8421366863444	2.17334831935799e-27	6.11218562780075e-26	yes	Bm5075	NA
WBGene00223217	4044.41750368079	2.3331340740123	0.215287373600912	10.8373010222946	2.29131305207349e-27	6.42707312904906e-26	yes	Bm2956	Bma-mdt-18
WBGene00228818	6797.51937735766	3.03845397727799	0.280450994719983	10.8341707980453	2.37103715610096e-27	6.63333240930072e-26	yes	Bm8557a	NA
WBGene00230322	1096.46164558993	2.66337876368634	0.246028045906717	10.8255087499097	2.60627711804377e-27	7.27246336454141e-26	yes	Bm10061	NA
WBGene00229704	3760.72724737963	2.23582606007748	0.206567048793919	10.823730469752	2.65736121885776e-27	7.39574687274309e-26	yes	Bm9443	Bma-mppe-1.2
WBGene00234042	11644.1484236099	2.56494228624219	0.237033535079035	10.8210101384471	2.73743481314165e-27	7.59886373648001e-26	yes	Bm13781a	Bma-ndk-1
WBGene00222572	10182.5305394406	-5.73758923985443	0.530587581978723	-10.8136515718238	2.96622597747938e-27	8.21269027097972e-26	yes	Bm2311a	NA
WBGene00220306	4302.08788777405	2.33252686458234	0.215801468458253	10.808670030128	3.1317748516591e-27	8.63914071830778e-26	yes	Bm45a	NA
WBGene00234180	7955.34854853095	2.47786401508484	0.22925067372418	10.8085353679966	3.13637493179816e-27	8.63914071830778e-26	yes	Bm13919	Bma-usp-14
WBGene00230007	699.236577391955	-6.50658903710321	0.602153521172649	-10.8055318258907	3.2407357597442e-27	8.90371376042542e-26	yes	Bm9746	NA
WBGene00227862	4474.09076473184	2.22768224569373	0.206451764035083	10.7903279785741	3.8242230561921e-27	1.04799360734267e-25	yes	Bm7601	Bma-lpd-5
WBGene00227453	4960.33427807237	2.35917668904315	0.218748552607813	10.7848790811103	4.05776628894676e-27	1.10915729046083e-25	yes	Bm7192	Bma-set-29
WBGene00231226	31134.5198657207	2.08448901012001	0.193307708568555	10.7832689423287	4.12944636593363e-27	1.12587831580099e-25	yes	Bm10965	NA
WBGene00221974	3348.67915813072	2.58390375049151	0.23967550279076	10.7808420986074	4.23986350319707e-27	1.15304917352174e-25	yes	Bm1713	NA
WBGene00228357	16276.2794927758	3.38623156304597	0.314117071046496	10.7801577028736	4.27152813624764e-27	1.15871959442768e-25	yes	Bm8096	NA
WBGene00223491	1162.36339151618	-5.18488161403187	0.481031265921925	-10.7786790201563	4.34074456071709e-27	1.1745221709112e-25	yes	Bm3230a	Bma-nas-14
WBGene00230218	4424.8048939866	2.37737242443208	0.220609651297396	10.7763754235178	4.4507969774782e-27	1.20126674089871e-25	yes	Bm9957	NA
WBGene00224257	8039.65381667404	2.56315422990814	0.237963865704608	10.7711909214396	4.70870600483826e-27	1.26768303622719e-25	yes	Bm3996	NA
WBGene00229624	10522.5427446956	3.13293538791243	0.291100385132847	10.7623883303441	5.18097270323551e-27	1.39133139135761e-25	yes	Bm9363a	NA
WBGene00225880	1529.26406080495	-4.12561991954046	0.384028136749002	-10.7430147032089	6.39223195479355e-27	1.71231913489032e-25	yes	Bm5619a	Bma-cyb-3
WBGene00231341	318.949738580711	-6.18060710117779	0.575352001372022	-10.7423057301254	6.44152073985695e-27	1.72121931988946e-25	yes	Bm11080	NA
WBGene00233905	310.720200275226	4.23100689978473	0.393891620293191	10.7415509287438	6.49440977917587e-27	1.73103484536989e-25	yes	Bm13644	NA
WBGene00225185	914.386374501659	2.86137680121748	0.266405450744097	10.7406841460089	6.5556766856247e-27	1.74302917336151e-25	yes	Bm4924a	NA
WBGene00226179	3550.69460683515	2.39528182314643	0.223174807565547	10.7327607863756	7.14296491577883e-27	1.89447695724184e-25	yes	Bm5918	Bma-jph-1
WBGene00222480	7655.97402070725	4.19957370761438	0.391447339242814	10.7283235485461	7.49434351296073e-27	1.98276273435492e-25	yes	Bm2219	NA
WBGene00233056	1334.97251577899	-4.57852881633976	0.427127448196595	-10.7193504788116	8.25812082667595e-27	2.17945233147371e-25	yes	Bm12795	NA
WBGene00226383	632.701828293149	-3.08929108525166	0.288246669081156	-10.7175257049783	8.42263890227942e-27	2.21740972574752e-25	yes	Bm6122	Bma-hmr-1
WBGene00222152	1471.63140760222	-2.78654860874449	0.260267174384468	-10.7064927236202	9.48888708651885e-27	2.48590281496454e-25	yes	Bm1891a	Bma-let-526
WBGene00224173	5459.68468269276	2.70981042303742	0.253098480362502	10.7065456068969	9.48346998047207e-27	2.48590281496454e-25	yes	Bm3912	NA
WBGene00229996	895.847941055018	-3.80541928144657	0.355773307710964	-10.696191082829	1.0604826645516e-26	2.77148091479767e-25	yes	Bm9735	NA
WBGene00268962	706.672332274141	3.54041744768897	0.33102662070221	10.6952650520331	1.07112966157462e-26	2.79249496928761e-25	yes	Bm17820	NA
WBGene00221596	185.055357885506	5.25385475154482	0.491335000166645	10.693019527945	1.09738959055487e-26	2.85401200553287e-25	yes	Bm1335	NA
WBGene00268722	3662.12886309512	2.33687691142767	0.218625132395804	10.6889673928107	1.14640192198061e-26	2.9742606765187e-25	yes	Bm17579	Bma-bmy-1.2
WBGene00224134	2241.40186699842	-6.1329643056144	0.574703381693985	-10.6715298725701	1.38329808931476e-26	3.58020266352842e-25	yes	Bm3873	Bma-tax-2
WBGene00226954	1396.58696521584	-4.59253532575854	0.430430918338329	-10.6696223019665	1.41199161917644e-26	3.64566028903026e-25	yes	Bm6693a	Bma-ani-1
WBGene00223119	2920.47516122493	4.65714691802625	0.436719491962805	10.6639318916017	1.50113880461917e-26	3.86651497391692e-25	yes	Bm2858a	NA
WBGene00228763	1912.16513010547	2.61710203561491	0.245474673307374	10.6613932930583	1.54268794035223e-26	3.96400510332712e-25	yes	Bm8502	NA
WBGene00229984	5652.59510862865	2.83046481388014	0.265681921713293	10.6535845405944	1.67777470776811e-26	4.30080286931467e-25	yes	Bm9723a	NA
WBGene00228220	2466.28139322265	2.87679375024597	0.270270751439394	10.6441179259128	1.85735021941751e-26	4.74976315061066e-25	yes	Bm7959	NA
WBGene00268979	936.206248327411	3.85578055441473	0.362352280462294	10.6409722314855	1.92114166791502e-26	4.90119832659749e-25	yes	Bm17837	NA
WBGene00221947	14630.554873076	2.25948321364109	0.212388725463785	10.6384329427428	1.97421633093155e-26	5.02463847646831e-25	yes	Bm1686	Bma-csn-2
WBGene00223279	1703.88337277811	-4.88030169232826	0.458817567560471	-10.6366931812938	2.01141634972021e-26	5.10718630029671e-25	yes	Bm3018a	NA
WBGene00222211	1764.51334038469	2.59806750908535	0.244332761376715	10.6333161973298	2.08561863542879e-26	5.28307415570202e-25	yes	Bm1950a	NA
WBGene00230059	682.725216722868	-3.78448844864152	0.356003699914136	-10.6304750471815	2.15014445441724e-26	5.43367873327377e-25	yes	Bm9798	NA
WBGene00222275	11794.1863629236	2.32675289891573	0.219126128329993	10.6183270641818	2.44910844782346e-26	6.17463459257137e-25	yes	Bm2014	NA
WBGene00225966	6694.02699923734	3.06436987684134	0.288848186086269	10.6089289268589	2.70835870013442e-26	6.81222147228646e-25	yes	Bm5705	NA
WBGene00223487	15850.4621038842	2.04440943454464	0.192713472171367	10.6085444442965	2.7195251962624e-26	6.82428863652264e-25	yes	Bm3226	Bma-prdx-2
WBGene00224958	12010.3297139608	2.52309774895473	0.23785014834588	10.6079301043178	2.73746222090123e-26	6.85324946190578e-25	yes	Bm4697a	Bma-par-1
WBGene00230268	22567.7330432962	2.14217152957346	0.201946350124099	10.6076268685077	2.74635904846001e-26	6.85949585180629e-25	yes	Bm10007	NA
WBGene00229353	5430.88836409362	3.16556094000146	0.298830246005416	10.5931744939369	3.20533670632093e-26	7.98725181586715e-25	yes	Bm9092	Bma-col-48
WBGene00223967	14225.6682336138	2.07565402615496	0.196224682660348	10.5779456387135	3.77136553177749e-26	9.37591222111271e-25	yes	Bm3706a	Bma-stn-1
WBGene00223815	1358.16984097037	2.97315168582413	0.281225802822426	10.572115559757	4.01337394235098e-26	9.95446800747472e-25	yes	Bm3554	NA
WBGene00226307	3742.60043373154	2.24423412461146	0.21243986914193	10.5640910704577	4.37183219558062e-26	1.08185177772855e-24	yes	Bm6046	NA
WBGene00223132	5833.77598715136	2.70390787686127	0.256022355523748	10.5612178722825	4.50774997133014e-26	1.11291568992632e-24	yes	Bm2871	NA
WBGene00226089	2116.79265324421	2.77432210200365	0.262793407494126	10.5570460403032	4.71258862620572e-26	1.15815108095858e-24	yes	Bm5828a	NA
WBGene00224456	1744.16622963105	2.5081835305301	0.237583641929731	10.5570548130242	4.71214834605305e-26	1.15815108095858e-24	yes	Bm4195	NA
WBGene00230034	341.828194138027	-4.23391150503379	0.401108963171584	-10.5555145702955	4.79007739281629e-26	1.17450066965736e-24	yes	Bm9773	NA
WBGene00226981	12220.6949787555	2.18706576500924	0.207237241407318	10.5534398651381	4.89707058906122e-26	1.19799341008655e-24	yes	Bm6720	NA
WBGene00226577	2380.86413505655	2.27704909713255	0.215950705684654	10.5443003296209	5.39730872389899e-26	1.31736134343002e-24	yes	Bm6316	NA
WBGene00222448	521.202027806407	-3.60801491460187	0.342596447733238	-10.5313844859572	6.19170251161649e-26	1.50782028209024e-24	yes	Bm2187	NA
WBGene00225315	1933.28260116452	2.58604738843767	0.245590567580193	10.5299133184064	6.28923681666531e-26	1.528099149446e-24	yes	Bm5054a	Bma-mrpl-35
WBGene00224739	2654.75592429636	2.95451189533001	0.280658751510064	10.5270613491775	6.48267253216319e-26	1.57153475525178e-24	yes	Bm4478	NA
WBGene00224245	5044.77422062775	2.20984351050343	0.210366792629218	10.5047164663407	8.2169346717179e-26	1.98745948098098e-24	yes	Bm3984	Bma-eas-1
WBGene00222157	932.762300923568	-4.23047308119326	0.402764146993533	-10.5035989741688	8.31482513096982e-26	2.00270859363319e-24	yes	Bm1896a	Bma-nhr-23
WBGene00224970	2717.32248265028	3.38345363494706	0.322124151506475	10.503570189083	8.31736186809864e-26	2.00270859363319e-24	yes	Bm4709	Bma-ttr-51
WBGene00226489	556.217387201195	3.09164275056479	0.294551668930174	10.4960965313617	9.00262955138644e-26	2.16285147181851e-24	yes	Bm6228a	Bma-zip-3
WBGene00220882	8052.73245654374	2.05391308119161	0.195950019743517	10.4818212515621	1.04707622501292e-25	2.50993775190457e-24	yes	Bm621a	NA
WBGene00224450	3779.07322337919	2.30200631971293	0.219644563017244	10.4805977807527	1.06071147085118e-25	2.53694718977017e-24	yes	Bm4189	Bma-dyb-1
WBGene00225703	26244.2595790705	2.05802530182858	0.196369340977206	10.4803799390836	1.06315764699434e-25	2.53713456292748e-24	yes	Bm5442a	Bma-pro-1
WBGene00268822	3635.45837466594	2.54437204936662	0.242847599507628	10.4772378006837	1.09906947288327e-25	2.61700653376538e-24	yes	Bm17680	Bma-nola-3.2
WBGene00233234	2304.33413448254	2.98359953949094	0.28509701205824	10.4652080284919	1.24802099960266e-25	2.9650875855305e-24	yes	Bm12973	NA
WBGene00226491	49123.6462289064	2.8480389554476	0.272233923127599	10.4617342421088	1.29464062477583e-25	3.06904298550289e-24	yes	Bm6230	Bma-lap-2
WBGene00222215	1439.79477423509	2.80494603215315	0.268245037029313	10.4566558368296	1.36591731178216e-25	3.23086180921541e-24	yes	Bm1954a	NA
WBGene00226617	6732.94417657591	2.09557722610281	0.200569977210128	10.4481102069796	1.49473909805088e-25	3.52778181401216e-24	yes	Bm6356	Bma-paqr-2
WBGene00224998	7216.45859400199	2.24536354203629	0.214954804446821	10.4457471784111	1.53243855405575e-25	3.60880859488075e-24	yes	Bm4737	Bma-dph-3
WBGene00227738	4019.11048617292	2.37512473996481	0.227636730483661	10.4338378736962	1.73726439764443e-25	4.08219035542985e-24	yes	Bm7477	NA
WBGene00222717	6022.49571522483	2.42834966870229	0.232815004114631	10.4303830328162	1.80160569881053e-25	4.2241148933818e-24	yes	Bm2456a	Bma-pxl-1
WBGene00231447	13781.0249261304	2.24876015245034	0.215663924332712	10.427150296037	1.86394704712714e-25	4.36074074453434e-24	yes	Bm11186	Bma-myo-3
WBGene00233154	2461.58780511186	2.21100091390516	0.212047075451005	10.4269342512862	1.86818873460454e-25	4.36114211139165e-24	yes	Bm12893	NA
WBGene00235062	523.870387247869	-7.90235371361135	0.758344324250933	-10.4205351855399	1.99825563077138e-25	4.65463240950333e-24	yes	Bm14727	NA
WBGene00232401	11652.8448989212	2.17400153248856	0.209195846955095	10.3921830386777	2.69121724951406e-25	6.25518282614818e-24	yes	Bm12140	Bma-mxt-1
WBGene00222690	13691.3826787786	2.25881364859301	0.217464420775881	10.3870492494078	2.84003696887362e-25	6.58679569729022e-24	yes	Bm2429a	NA
WBGene00226921	478.650016553111	-3.45762271177988	0.333152013979741	-10.3785136114775	3.10572828011012e-25	7.18744676487688e-24	yes	Bm6660	NA
WBGene00225655	308.094753850518	4.23792249693842	0.408499298598521	10.374369090664	3.24347710759475e-25	7.49005543273227e-24	yes	Bm5394a	NA
WBGene00222607	1141.19333528107	2.60536609408034	0.251378702330914	10.3643071983506	3.60360303166558e-25	8.30378634070898e-24	yes	Bm2346a	Bma-cal-5
WBGene00221790	567.921196174129	-4.96307280553686	0.478986353886939	-10.3616162866894	3.70645184480676e-25	8.52245311525847e-24	yes	Bm1529	NA
WBGene00225695	628.26553464182	-3.01766757547449	0.291287839818532	-10.359744427898	3.77970598061944e-25	8.67228042448336e-24	yes	Bm5434a	Bma-hsp-75
WBGene00223526	665.11448292711	-3.07316757695536	0.296684498295369	-10.3583692259372	3.83443618714354e-25	8.77905635582117e-24	yes	Bm3265a	NA
WBGene00235022	6308.64459886894	2.19690447404795	0.212112526430566	10.35725947457	3.87917396852592e-25	8.86254777670687e-24	yes	Bm14687a	NA
WBGene00225030	8878.01292093875	2.01987844533459	0.195184884915513	10.3485392642412	4.24919248926905e-25	9.68725479202508e-24	yes	Bm4769a	NA
WBGene00229865	320.580760219209	4.13969082435931	0.400127239800861	10.3459360237998	4.36628443455445e-25	9.93306533253736e-24	yes	Bm9604	NA
WBGene00227780	1080.56871818469	-6.99272595306029	0.676017666348462	-10.3439988348704	4.45548745577924e-25	1.01145229001429e-23	yes	Bm7519	NA
WBGene00226336	2232.92393329696	2.51459972828233	0.243401153755271	10.3310920654495	5.09768736291134e-25	1.15479323665106e-23	yes	Bm6075a	NA
WBGene00232281	7854.43390275139	2.22055410921935	0.215115039247735	10.3226353535518	5.56736855470063e-25	1.25853067644762e-23	yes	Bm12020	Bma-tim-1
WBGene00223212	609.066597734946	3.52602970141306	0.341961755848604	10.3111814146086	6.27254401256606e-25	1.41495387567674e-23	yes	Bm2951	NA
WBGene00234121	9868.43001863028	2.02488905201341	0.196652927995145	10.2967653350343	7.28705001763149e-25	1.64035170039751e-23	yes	Bm13860	NA
WBGene00227461	21344.0138880391	2.09129156929895	0.20323745487638	10.2898925327076	7.82636737418881e-25	1.7580613504074e-23	yes	Bm7200a	Bma-ubxn-2
WBGene00225852	1412.42084625354	-2.74976118864217	0.267288905442953	-10.2875994201303	8.01496620323317e-25	1.79666031103857e-23	yes	Bm5591	Bma-cdk-1.4
WBGene00233127	2299.68559655045	2.42479684856129	0.236023194617689	10.2735532094165	9.27252092427869e-25	2.07421840717424e-23	yes	Bm12866	NA
WBGene00222005	2713.60352751094	2.36212607701014	0.229966297538875	10.2716185036237	9.46039979571485e-25	2.11183716273093e-23	yes	Bm1744a	Bma-anmt-1
WBGene00222411	2506.36325290747	-3.31290599187805	0.323253475101127	-10.2486322562863	1.20029937687989e-24	2.67384778030519e-23	yes	Bm2150a	Bma-tiam-1.2
WBGene00233921	2570.25037271894	2.25462556610899	0.220061246936557	10.2454457451974	1.24051748536202e-24	2.75770640158799e-23	yes	Bm13660	NA
WBGene00229864	936.34045393337	5.10344471135094	0.498287233871717	10.2419736337552	1.28586121398292e-24	2.852588593753e-23	yes	Bm9603	NA
WBGene00268772	1304.2515966849	-12.0186906694309	1.17354950885296	-10.2413154100146	1.29464055301951e-24	2.86613089371984e-23	yes	Bm17630	Bma-nhr-2.1
WBGene00230790	765.171726134012	3.1400279358	0.306658848120268	10.2394825880534	1.31940072569498e-24	2.91492345893232e-23	yes	Bm10529a	NA
WBGene00223830	396.522540449234	3.31487732220425	0.323754353326704	10.2388656342149	1.32784043793433e-24	2.92753298198896e-23	yes	Bm3569	Bma-acs-12
WBGene00233927	5491.99107940234	2.15829711198239	0.210967700560635	10.2304623231273	1.44826319741725e-24	3.18647641895808e-23	yes	Bm13666a	Bma-pbs-2
WBGene00226543	6802.5564427941	2.44175375339253	0.238876849999097	10.2218099133582	1.58356148154629e-24	3.47702075302634e-23	yes	Bm6282a	NA
WBGene00229409	1972.5724292312	-5.88385623288886	0.57596645386081	-10.2156231382024	1.68791100563014e-24	3.69856164117115e-23	yes	Bm9148	NA
WBGene00268644	1251.01823105203	3.93598977052373	0.385457957235467	10.2112038333647	1.76659264599058e-24	3.86306942893654e-23	yes	Bm17501	NA
WBGene00227060	9030.0952988327	1.97788057933455	0.19393038883639	10.1989202991966	2.00488851097512e-24	4.3752302230343e-23	yes	Bm6799	Bma-mek-2.2
WBGene00225780	13199.8804384063	2.58334140496042	0.253368952191046	10.1959667221283	2.06677972541472e-24	4.50112698329648e-23	yes	Bm5519a	NA
WBGene00220358	57418.2391906968	10.3806007710688	1.01834186243169	10.1936306009075	2.11706973130595e-24	4.6012986147958e-23	yes	Bm97a	NA
WBGene00224353	10526.0868639683	2.04630117784477	0.200790579687516	10.191221027547	2.17021098236263e-24	4.70724912469951e-23	yes	Bm4092	NA
WBGene00229998	5649.34507591326	2.83202411083427	0.277937708187521	10.1894202456456	2.21078664307182e-24	4.78557149101304e-23	yes	Bm9737a	Bma-chs-2
WBGene00231065	11269.8219560531	2.27638152628597	0.22345716452291	10.1871046790831	2.26406777323865e-24	4.89102544158308e-23	yes	Bm10804a	NA
WBGene00230974	604.095204373559	-3.04174592643431	0.298627090862059	-10.1857668627906	2.295428624411e-24	4.94879632003296e-23	yes	Bm10713	NA
WBGene00268964	1132.22149116552	4.75903922750215	0.467587308576487	10.1778622734446	2.48970615918369e-24	5.35686777021149e-23	yes	Bm17822	NA
WBGene00229592	599.680335312783	-4.11778786720166	0.404784645325846	-10.1727867268456	2.62294999744561e-24	5.63224633720035e-23	yes	Bm9331	Bma-tiam-1.1
WBGene00227681	951.669028482166	2.9537452057683	0.290387431187412	10.1717391613344	2.65131788468278e-24	5.6817742268752e-23	yes	Bm7420	Bma-slc-17.1
WBGene00233008	542.97671236685	-3.53153612680864	0.347425421594114	-10.1648754158653	2.84485486143688e-24	6.08435525754415e-23	yes	Bm12747a	Bma-egl-43
WBGene00222910	673.740111487329	-3.54326950340935	0.349141163371513	-10.1485298072374	3.36392716545728e-24	7.18017521471609e-23	yes	Bm2649	Bma-idhb-1
WBGene00230708	860.240839558045	2.97774037251189	0.293556592616127	10.1436671749552	3.5357173596314e-24	7.53185119452295e-23	yes	Bm10447	NA
WBGene00226787	1096.17047666913	2.46224804560291	0.242751744328244	10.1430704542065	3.5573884884137e-24	7.56297969312555e-23	yes	Bm6526a	Bma-osm-5
WBGene00228127	3937.78762600628	2.87784980258809	0.283795517456737	10.1405752577709	3.64944101350604e-24	7.74331890291431e-23	yes	Bm7866	NA
WBGene00231054	14514.3455598419	2.01286315784747	0.198653540246735	10.1325310152913	3.96257371777451e-24	8.39110225018852e-23	yes	Bm10793a	NA
WBGene00268789	488.590900086808	3.95061363323422	0.389970415988881	10.1305470139737	4.04380836296335e-24	8.52941074983312e-23	yes	Bm17647	NA
WBGene00229192	1739.96036816542	2.63120297174684	0.259729426735456	10.1305539569331	4.04352122798008e-24	8.52941074983312e-23	yes	Bm8931	NA
WBGene00227781	1670.42630491958	2.36681132663516	0.23385767299441	10.1207341043359	4.47049874983337e-24	9.41088292818557e-23	yes	Bm7520	Bma-tomm-7
WBGene00224523	4359.46575826549	2.09915041440313	0.207721350781942	10.1056073749816	5.21712773418626e-24	1.09610830729031e-22	yes	Bm4262	NA
WBGene00223572	5227.56667014603	2.59968572954831	0.257324117572922	10.1027674905427	5.37048133531557e-24	1.12611952070267e-22	yes	Bm3311a	Bma-ddr-2
WBGene00223390	4083.0828575264	3.32411047526693	0.329493868666502	10.0885351485294	6.20891184673137e-24	1.29938457886185e-22	yes	Bm3129	NA
WBGene00229282	2187.67865962072	2.82631099780728	0.280258265194794	10.0846659984955	6.45844530428733e-24	1.34897156794228e-22	yes	Bm9021	NA
WBGene00223277	227.029948167486	-5.81001639307624	0.576237587059309	-10.0826751387848	6.59068656654251e-24	1.37391452452341e-22	yes	Bm3016	NA
WBGene00222907	3974.19716469234	2.21228149341843	0.219432759619626	10.0818195845201	6.6483366826655e-24	1.38324131174293e-22	yes	Bm2646	Bma-memo-1
WBGene00222798	15701.3789791993	2.13987211062727	0.212255790605968	10.0815723543662	6.66508870095975e-24	1.38403925253457e-22	yes	Bm2537a	Bma-tbck-1
WBGene00230376	2876.97003489781	2.35836621563537	0.234396655378876	10.0614328810423	8.1799010728674e-24	1.69531218560492e-22	yes	Bm10115	NA
WBGene00222285	27742.928643253	2.02923142405495	0.201861871134441	10.0525741322564	8.94984992136941e-24	1.8513058283296e-22	yes	Bm2024a	NA
WBGene00222088	2308.96318501623	2.38927098166305	0.237864228558683	10.0446838776079	9.69580558793648e-24	2.00174483381001e-22	yes	Bm1827a	Bma-moa-2
WBGene00224841	1603.9564673965	2.38816598310974	0.2379032646927	10.038390966154	1.03346126915054e-23	2.1295264421054e-22	yes	Bm4580a	NA
WBGene00229870	3724.53306684554	2.0921872994921	0.208470728352216	10.0358804136632	1.0600941985314e-23	2.1802129246188e-22	yes	Bm9609	NA
WBGene00233113	3033.0048267438	2.47226147557468	0.246732594225018	10.0200035724506	1.24498445663379e-23	2.55555717487184e-22	yes	Bm12852a	NA
WBGene00226831	13689.9256494437	2.40083211503266	0.239971980340951	10.004635172913	1.45426718336495e-23	2.97944031926489e-22	yes	Bm6570	Bma-rpl-18
WBGene00232647	11452.1739216725	2.91477248132028	0.291459295133734	10.0006159693169	1.51452046696465e-23	3.09696313044394e-22	yes	Bm12386a	Bma-ifa-4
WBGene00224855	22702.556049382	1.95560815491971	0.195569089358592	9.99957693382687	1.53049504504556e-23	3.12366750622155e-22	yes	Bm4594	Bma-cyn-4
WBGene00224008	10213.8628922944	1.93470067587818	0.193563882636158	9.99515327719914	1.60039455103798e-23	3.26011931832166e-22	yes	Bm3747	Bma-metl-17
WBGene00227782	6122.75817445602	2.18010080956952	0.218164885649956	9.99290423421978	1.63713528380564e-23	3.32143593257576e-22	yes	Bm7521a	Bma-ufm-1
WBGene00223016	7037.55937170886	1.95542802745939	0.1956848031945	9.99274340949102	1.63979431482275e-23	3.32143593257576e-22	yes	Bm2755a	Bma-mak-2
WBGene00225834	5245.44300649532	2.0081096068698	0.20095547660078	9.99280856057046	1.63871661017521e-23	3.32143593257576e-22	yes	Bm5573	NA
WBGene00226565	25107.678147137	1.90982481801955	0.19114165056143	9.99167273281321	1.65760592134504e-23	3.35117876362492e-22	yes	Bm6304a	NA
WBGene00227334	1774.36485074824	2.2600026990051	0.226252266152211	9.98886215568193	1.70527897617439e-23	3.44106670992628e-22	yes	Bm7073	NA
WBGene00226377	776.426704343996	-2.67555953075949	0.268041797700426	-9.98187429614913	1.82977223824213e-23	3.68534013773767e-22	yes	Bm6116	Bma-uba-2
WBGene00221966	161779.378142408	2.19417911127173	0.219872392527519	9.97932976509142	1.87730552860834e-23	3.77398287786836e-22	yes	Bm1705a	Bma-kin-3
WBGene00221078	921.195266588883	-5.26823532909892	0.528285630304767	-9.97232373339341	2.0145932729956e-23	4.04239080901646e-22	yes	Bm817	NA
WBGene00222641	1937.18587135691	2.89304246918833	0.290152058753956	9.97078043013845	2.04614647851285e-23	4.09802981631126e-22	yes	Bm2380	NA
WBGene00229892	17431.1950876698	2.04308762836559	0.204930438217917	9.96966407788105	2.06927511341237e-23	4.13661993287566e-22	yes	Bm9631	NA
WBGene00230752	455.334717534943	-9.20721825878584	0.924263796615523	-9.96167792409581	2.24245607223894e-23	4.47447240484922e-22	yes	Bm10491	NA
WBGene00223997	548.701980537567	3.11031116009683	0.31272717148005	9.94576565054005	2.63142610042279e-23	5.24084213123238e-22	yes	Bm3736	Bma-nac-1
WBGene00224275	2431.487622994	2.77361912075052	0.279014586494677	9.94076745447658	2.76687166874121e-23	5.5003766104939e-22	yes	Bm4014	NA
WBGene00226707	2745.36756195892	2.1587759936966	0.217387894842787	9.93052531861447	3.06635790983205e-23	6.08444907478711e-22	yes	Bm6446a	Bma-swt-4
WBGene00228612	13000.0466530614	2.03156815196513	0.204602318599398	9.9293505854293	3.1026964386478e-23	6.14517418486344e-22	yes	Bm8351a	Bma-sec-23
WBGene00234949	1035.59366954998	2.9040383961761	0.292857005198941	9.91623333101884	3.5385876875313e-23	6.99556588042397e-22	yes	Bm14764	NA
WBGene00224803	4262.28969715441	2.74712560477417	0.277082469041203	9.9144691985752	3.60165749003531e-23	7.10713812260191e-22	yes	Bm4542a	Bma-bbs-4
WBGene00224468	3383.86682691021	5.47980907991154	0.552879992543261	9.91138972981151	3.71443038761039e-23	7.31619882412598e-22	yes	Bm4207a	Bma-lon-1
WBGene00224807	813.67531926341	2.78902597098718	0.281656692478166	9.90221800322883	4.07143560135201e-23	8.00466650797922e-22	yes	Bm4546a	NA
WBGene00268993	457.543676436855	4.25722591260475	0.430089228985589	9.89847135359765	4.2268619788744e-23	8.29502309590462e-22	yes	Bm17851	NA
WBGene00229221	1732.90934331672	2.61529255536733	0.264308792722626	9.89483750588619	4.38321661503523e-23	8.58613638575913e-22	yes	Bm8960	Bma-kin-9
WBGene00225234	3508.88481348028	2.85338575003373	0.288565938593366	9.88815853992591	4.68567460413797e-23	9.16186193126611e-22	yes	Bm4973	NA
WBGene00222089	818.366370365862	-3.23373182710764	0.327112088853355	-9.8856995424505	4.80215942434701e-23	9.37252062511443e-22	yes	Bm1828	NA
WBGene00225525	4122.28403494935	2.27596588842743	0.230414801885667	9.87768958331409	5.20184016668612e-23	1.01341304338258e-21	yes	Bm5264	Bma-glo-1
WBGene00227084	2337.93051059012	2.30382791743905	0.233516407097052	9.86580748684417	5.8561338509822e-23	1.13881078426995e-21	yes	Bm6823	Bma-manf-1
WBGene00222127	2405.50035219502	2.36239363783906	0.239752846623821	9.85345396772583	6.62280612459123e-23	1.285568254076e-21	yes	Bm1866a	NA
WBGene00230220	12454.6457492002	2.3013451932121	0.234024407028411	9.83378281963859	8.05355444730974e-23	1.55988843253593e-21	yes	Bm9959	Bma-rps-23.1
WBGene00234018	16022.6006475449	1.98803800786598	0.202167087130723	9.8336382844577	8.06512544680266e-23	1.55988843253593e-21	yes	Bm13757a	Bma-rpt-1
WBGene00229118	601.6173327855	-2.98226637870859	0.303278582042404	-9.83342232288469	8.08244527642001e-23	1.56042164210523e-21	yes	Bm8857	NA
WBGene00269197	4483.53749609625	3.2402029056544	0.329822997312906	9.82406603557843	8.86923180397012e-23	1.70924134495575e-21	yes	Bm18057	NA
WBGene00230822	5937.79405705162	1.93596175397096	0.197250506691481	9.81473653195221	9.7291805965039e-23	1.8716008993095e-21	yes	Bm10561a	Bma-tbcb-1
WBGene00225066	13453.0421599322	2.15626184755288	0.219760275684852	9.81188179179877	1.00084454474145e-22	1.92187263385387e-21	yes	Bm4805a	NA
WBGene00223259	9541.23054936408	2.41303955403515	0.246094362013319	9.80534269169707	1.06783919834861e-22	2.04685098574335e-21	yes	Bm2998	Bma-rps-10
WBGene00230412	10704.0260147512	2.14995415059236	0.21928542930497	9.80436391695829	1.07824180667065e-22	2.06310017115643e-21	yes	Bm10151a	NA
WBGene00224152	2393.78238869851	2.44152085874861	0.249415093338037	9.78898600751305	1.25548596299583e-22	2.39795580989311e-21	yes	Bm3891	NA
WBGene00225997	1392.03283849524	2.37458786232325	0.242776793483989	9.78095075829333	1.35927604883256e-22	2.59157346321012e-21	yes	Bm5736a	NA
WBGene00224663	504.666105231985	3.05170416930644	0.312200334515711	9.77482671195815	1.44404230265664e-22	2.74829720656588e-21	yes	Bm4402	NA
WBGene00224084	1034.06568522369	2.40695282732961	0.246336439541506	9.77099787514001	1.49967616928006e-22	2.8491188216021e-21	yes	Bm3823a	NA
WBGene00223887	8187.87543987266	2.56130236985448	0.262391988693839	9.76135888372349	1.64930270626389e-22	3.12783690223321e-21	yes	Bm3626a	NA
WBGene00226777	21593.9388827054	2.27042810711175	0.232727056212121	9.75575484890055	1.74299114351358e-22	3.29967316302968e-21	yes	Bm6516	Bma-set-23
WBGene00227440	608.474834390594	3.18093200779936	0.326128036332522	9.75362941368238	1.77988576264475e-22	3.36357600471578e-21	yes	Bm7179	NA
WBGene00225373	1973.97757210358	2.60242417085218	0.267042417827379	9.74535877867329	1.93095563586142e-22	3.64263902081956e-21	yes	Bm5112	NA
WBGene00234236	24933.9904615053	2.0486383376378	0.210385776112375	9.73753252474417	2.08556822903369e-22	3.92739254377786e-21	yes	Bm13975	Bma-map-1
WBGene00227058	9736.49039888415	2.11499841405043	0.217434452692699	9.72706205414269	2.3117326944812e-22	4.34565189848527e-21	yes	Bm6797	Bma-rom-5
WBGene00231066	25073.2973692699	2.51457083319979	0.25853039398072	9.72640312994422	2.32675103494723e-22	4.36622370218207e-21	yes	Bm10805	NA
WBGene00222044	78891.4937413067	2.00445552486866	0.206131554886397	9.72415662402273	2.37868339554905e-22	4.45587282924967e-21	yes	Bm1783a	Bma-rps-0
WBGene00220483	463.185026741214	2.99226329180702	0.307903447597918	9.71818703282116	2.52232295662444e-22	4.71669990928985e-21	yes	Bm222a	NA
WBGene00224038	3186.70341725125	2.03400772788823	0.209398418883147	9.71357729794176	2.63908646655124e-22	4.92644799461613e-21	yes	Bm3777	Bma-thoc-3
WBGene00268978	3686.09519126613	3.82826858869661	0.394325005837049	9.7084093882664	2.77635744992611e-22	5.17368175234056e-21	yes	Bm17836	NA
WBGene00220643	604.836572208867	3.20768987672276	0.330605768290812	9.70246191803034	2.94309873089911e-22	5.47487897596944e-21	yes	Bm382	NA
WBGene00228996	873.841200261073	2.84948085319531	0.293877583849826	9.6961490422877	3.13093358872152e-22	5.81420336276449e-21	yes	Bm8735	NA
WBGene00233923	16619.6550177456	1.93455067829172	0.19968464772324	9.68802910163121	3.39007231827559e-22	6.28453717825656e-21	yes	Bm13662a	Bma-hsp-6
WBGene00224386	48341.3878362913	2.30269840138663	0.237743003036119	9.68566213087157	3.46952998176232e-22	6.42072776417673e-21	yes	Bm4125	NA
WBGene00225764	23006.0632039716	3.88785703210915	0.401481137729072	9.68378503184566	3.53385099684997e-22	6.52848507435301e-21	yes	Bm5503	Bma-sbt-1
WBGene00230047	1439.16594956189	2.37498513492258	0.245441472836027	9.67638071708133	3.79928152131808e-22	7.00676445799023e-21	yes	Bm9786	NA
WBGene00226387	5508.09605127311	2.06530272572071	0.213527076825122	9.67232238847245	3.95303898769224e-22	7.27780287854337e-21	yes	Bm6126	Bma-mfn-1
WBGene00220450	568.630693287627	3.20668190246335	0.331808325690945	9.6642599180894	4.27700034622714e-22	7.86073048195949e-21	yes	Bm189	NA
WBGene00227918	656.369988541684	2.78695732795593	0.288415259532855	9.66300234068736	4.32984680220972e-22	7.9442309050817e-21	yes	Bm7657	Bma-rol-8.2
WBGene00225274	2485.05514962493	2.05539877680547	0.212831229078085	9.65741158244863	4.57271443479484e-22	8.37549319125243e-21	yes	Bm5013	NA
WBGene00230627	713.573393913257	-6.11364957103497	0.633123383367105	-9.65633197516902	4.62114331055316e-22	8.44975265743637e-21	yes	Bm10366a	NA
WBGene00233181	34067.1910275691	2.08448390218301	0.215875342223672	9.65596107786708	4.63789783406586e-22	8.46594127632295e-21	yes	Bm12920	NA
WBGene00225514	2206.27588979639	-3.20385968773022	0.331809340047359	-9.65572484268508	4.6486005960193e-22	8.47104683441272e-21	yes	Bm5253a	NA
WBGene00223596	3277.09114634221	2.23899975053802	0.23199965119997	9.65087550329175	4.87378314277127e-22	8.86631347619594e-21	yes	Bm3335a	NA
WBGene00234166	12949.1897584552	2.14292075223134	0.222136533628122	9.64686320269491	5.06823164680218e-22	9.1782246716815e-21	yes	Bm13905	Bma-rla-1
WBGene00227649	6875.56428217053	2.3003389195818	0.238449439681479	9.64707202774138	5.05792457440468e-22	9.1782246716815e-21	yes	Bm7388	NA
WBGene00231159	4810.64988914149	1.97568791672506	0.204802233274956	9.64680846069003	5.07093700945912e-22	9.1782246716815e-21	yes	Bm10898a	NA
WBGene00268849	2602.03450904623	3.60550716137915	0.373911680256264	9.64267058709713	5.27962246704759e-22	9.53982373261634e-21	yes	Bm17707	NA
WBGene00225617	959.411407764361	2.80017583612972	0.290652753087313	9.63409362679782	5.7396273546752e-22	1.03535533847382e-20	yes	Bm5356	NA
WBGene00223407	7893.68605609204	2.25784871344833	0.234464778821491	9.6297990887891	5.98463756444671e-22	1.07773767232011e-20	yes	Bm3146a	Bma-far-1
WBGene00222678	337.459877527832	-3.47500674341949	0.360868081918379	-9.62957633977024	5.99762430043848e-22	1.07826416743621e-20	yes	Bm2417	Bma-rpl-22.1
WBGene00222884	13476.2853432674	2.47126293424333	0.256812967253989	9.62281212147378	6.40555383872163e-22	1.14967352398496e-20	yes	Bm2623a	NA
WBGene00227526	2610.83841434782	2.1395442129037	0.222371492745118	9.62148603893235	6.48868670124061e-22	1.16264678936109e-20	yes	Bm7265	NA
WBGene00223089	11849.3076001956	1.8935988066813	0.196912499560203	9.61644797009123	6.8143738361985e-22	1.21896520291931e-20	yes	Bm2828	NA
WBGene00224636	930.002370200655	-2.47224681696332	0.257134602518728	-9.61460181845131	6.93772526953555e-22	1.23896210438456e-20	yes	Bm4375a	Bma-par-3
WBGene00229992	714.057394750258	3.80416360129591	0.396287635916264	9.59950111110643	8.03323015884526e-22	1.43221399587399e-20	yes	Bm9731	NA
WBGene00221598	316.66934961747	3.84481554028908	0.401037770153015	9.58716566477541	9.05379545532502e-22	1.61148535388385e-20	yes	Bm1337	NA
WBGene00233589	16234.9819845067	2.13860054343872	0.223194293442576	9.58178863111902	9.53786370503151e-22	1.69482934659059e-20	yes	Bm13328	NA
WBGene00268992	474.417246291777	3.88050367375131	0.405138660296746	9.5782112497213	9.87401480068874e-22	1.75165676472483e-20	yes	Bm17850	NA
WBGene00268960	2462.0271790697	2.38568119441877	0.249121573775153	9.57637332755451	1.00512478178409e-21	1.78015074988702e-20	yes	Bm17818	NA
WBGene00230914	1701.75742418704	3.55985654163039	0.371869490136154	9.57286530908197	1.03983124356977e-21	1.83857950080035e-20	yes	Bm10653	NA
WBGene00234009	4619.21816692024	1.98208581727673	0.207119825981116	9.5697541647097	1.0716017289812e-21	1.89163303559037e-20	yes	Bm13748	NA
WBGene00226030	7304.69941396831	1.92255656148068	0.201053447345679	9.5624153023109	1.15040023097767e-21	2.02739119653384e-20	yes	Bm5769a	Bma-pis-1
WBGene00227122	3642.42072384285	1.99334881934708	0.208541723631774	9.55851320605163	1.19460481466653e-21	2.10183753516452e-20	yes	Bm6861	Bma-mrpl-46
WBGene00223496	11245.2891195078	2.66750311875056	0.279238290436142	9.55278416360517	1.26256735080755e-21	2.21777199408245e-20	yes	Bm3235	Bma-mlc-3
WBGene00226050	4099.60397109172	2.09519507374701	0.219397205677924	9.54978012264553	1.29971842205086e-21	2.27929343572422e-20	yes	Bm5789a	Bma-svh-2
WBGene00225080	3196.42837216748	3.04321471543474	0.318799827302395	9.54584806769084	1.34998492261837e-21	2.36357654344049e-20	yes	Bm4819	Bma-sel-7
WBGene00234320	15523.7270394347	2.29526320808488	0.240703899874236	9.5356294986667	1.48978949620249e-21	2.60409371155133e-20	yes	Bm14059	Bma-rps-12
WBGene00222780	2062.33367614617	-3.85315648445231	0.404283094844321	-9.53083750864244	1.56019397353466e-21	2.7227163560951e-20	yes	Bm2519a	Bma-pde-5
WBGene00230262	300.522258801173	3.55764916060091	0.373326031183401	9.52960378713364	1.57884653939923e-21	2.75078710075816e-20	yes	Bm10001	NA
WBGene00222338	349.896564910516	3.95127431880335	0.415075686493074	9.51940681514545	1.74170385506512e-21	3.02960337776343e-20	yes	Bm2077	NA
WBGene00224751	14999.8337647202	2.15410476250076	0.226470185732145	9.51164832375994	1.87664997954491e-21	3.25904449446088e-20	yes	Bm4490	Bma-rps-1
WBGene00226670	2030.12520905451	2.28665063073854	0.240411084784082	9.51141929579591	1.88078688038967e-21	3.26094359601542e-20	yes	Bm6409	Bma-ndx-4
WBGene00226622	8148.94774632923	2.2394672208626	0.235631480827834	9.50410875913003	2.01768307711284e-21	3.49264526191665e-20	yes	Bm6361a	NA
WBGene00220707	56546.4992949804	2.29575861762818	0.241814149902244	9.49389693926622	2.22555072663534e-21	3.84625419933834e-20	yes	Bm446	NA
WBGene00226372	53274.8168021971	1.93587378514171	0.203934234435529	9.49263761672984	2.25260956220499e-21	3.88674902721843e-20	yes	Bm6111	NA
WBGene00223334	1377.50023843484	-3.18594879116052	0.335808293257061	-9.48740354283531	2.36860395809677e-21	4.08032016254131e-20	yes	Bm3073	Bma-lmn-1
WBGene00227513	6510.22634298725	2.16685525146907	0.228408499289142	9.48675403153911	2.3834040021408e-21	4.09922534236576e-20	yes	Bm7252a	Bma-ero-1
WBGene00222255	11546.0157461895	1.87664213547178	0.197855715696616	9.48490231310449	2.42610209890388e-21	4.16597499835818e-20	yes	Bm1994	NA
WBGene00223133	1092.6342100644	2.3852311241934	0.251548356578558	9.48219720707456	2.48984168404875e-21	4.26858458313318e-20	yes	Bm2872	Bma-magu-3
WBGene00226640	449.198150129558	-3.27235284020585	0.345115804420828	-9.4818979550864	2.49699383737798e-21	4.27400782228516e-20	yes	Bm6379	NA
WBGene00234304	16993.2893696738	2.11250181297671	0.222809709173199	9.48119281164079	2.51392730482072e-21	4.29612935744083e-20	yes	Bm14043	Bma-rpl-13
WBGene00225786	4218.31351593675	2.26461462898222	0.239231333547508	9.46621245386531	2.9017484979557e-21	4.95099285917123e-20	yes	Bm5525a	NA
WBGene00226321	2202.92826901431	2.28005908292781	0.241013881211748	9.46028117328487	3.07116249615783e-21	5.23171798828795e-20	yes	Bm6060a	NA
WBGene00234944	1741.74817945582	2.63946403070181	0.279296534639256	9.45040021391953	3.37537637281325e-21	5.74081870391968e-20	yes	Bm14759	Bma-fshr-1
WBGene00233995	1371.8873913591	-3.94474823412792	0.417520362297675	-9.44803796494954	3.45241134834691e-21	5.86253369216119e-20	yes	Bm13734	Bma-mcm-5
WBGene00223896	938.126796143034	2.51550545797884	0.266357553151138	9.44409283017957	3.58496138168086e-21	6.07798436783393e-20	yes	Bm3635a	Bma-ttm-2
WBGene00223038	1244.43938105786	-5.15875647070964	0.54692756839968	-9.43224801376213	4.01392423216731e-21	6.7945020770415e-20	yes	Bm2777	Bma-aspm-1
WBGene00234976	20670.3536620736	1.99384306902367	0.211552584285087	9.42481074273606	4.30881913595784e-21	7.28217618955651e-20	yes	Bm14791	Bma-nft-1
WBGene00268946	495.714358505082	4.29611579783523	0.456438805805996	9.41224922856635	4.85631578803096e-21	8.19455490846484e-20	yes	Bm17804	NA
WBGene00231186	485.873678204554	2.88299875017073	0.306389991590355	9.40957220960833	4.98160256334966e-21	8.39274708589491e-20	yes	Bm10925a	NA
WBGene00220407	1342.88008269008	3.92534213218426	0.417253481805614	9.40757190376896	5.07730044923228e-21	8.54054541813561e-20	yes	Bm146	NA
WBGene00228931	4507.92228244883	-11.8636901340074	1.26301296429659	-9.3931657626449	5.8223408565872e-21	9.77842982418994e-20	yes	Bm8670	NA
WBGene00222011	3981.83551669572	2.0378633831236	0.217033750276003	9.38961511991586	6.02199025728767e-21	1.00979069807257e-19	yes	Bm1750a	Bma-hlh-1
WBGene00229833	5758.92911352861	1.94257186846561	0.207101319860131	9.37981404356842	6.60891840595928e-21	1.10647751124771e-19	yes	Bm9572	NA
WBGene00230460	863.26928910358	-3.75609469540333	0.400534804534363	-9.37769864910975	6.74283508559533e-21	1.12713694137526e-19	yes	Bm10199	NA
WBGene00226075	28088.4446293429	2.14414952619394	0.228652131858473	9.37734325399199	6.7655954668162e-21	1.12917999107376e-19	yes	Bm5814	Bma-ekl-6
WBGene00224248	2455.31985856069	2.96007618784084	0.315705300542681	9.37607377118035	6.84751846459713e-21	1.14107558861832e-19	yes	Bm3987	NA
WBGene00231074	5556.00068004628	-2.81499229566838	0.300552451862075	-9.3660599946135	7.52907066616822e-21	1.25270174204957e-19	yes	Bm10813	NA
WBGene00222289	15297.6224792732	1.91070441696612	0.204263936830219	9.35409571859113	8.43178720239171e-21	1.40072247866089e-19	yes	Bm2028a	NA
WBGene00225656	7586.14621414269	2.04294196077492	0.218612850886333	9.34502227335731	9.18701342787651e-21	1.52382119008819e-19	yes	Bm5395a	Bma-pde-12
WBGene00234310	33947.0450601687	2.02560450157379	0.216783013351664	9.34392630795232	9.28264812158951e-21	1.5373040899974e-19	yes	Bm14049	Bma-rps-7
WBGene00223932	11696.853571846	2.29466696502047	0.245837425196648	9.33408313719907	1.018690811145e-20	1.68445556194732e-19	yes	Bm3671	Bma-rpl-26
WBGene00227763	17821.7331253639	2.34400672973361	0.251576288573429	9.31728003074286	1.19360874675499e-20	1.97064988004311e-19	yes	Bm7502	Bma-unc-22
WBGene00230532	5633.32530234494	2.07250569127316	0.222455586983165	9.31649197657597	1.20250421421768e-20	1.98228194697576e-19	yes	Bm10271	NA
WBGene00225382	3203.32221895333	2.48583705534856	0.26683783735981	9.31590916769648	1.2091250340395e-20	1.9870820152965e-19	yes	Bm5121	NA
WBGene00226227	1235.6012945837	-5.33583307274029	0.572764023653929	-9.31593614888819	1.20881772833193e-20	1.9870820152965e-19	yes	Bm5966	Bma-gld-1
WBGene00231373	564.283203267267	4.2399525291641	0.455315937939577	9.31211094509668	1.25316526723344e-20	2.05630411001628e-19	yes	Bm11112	NA
WBGene00234298	6377.91989995448	2.15019319189912	0.230975493928879	9.30918321820406	1.28819134588435e-20	2.11054591302001e-19	yes	Bm14037a	Bma-pno-1
WBGene00269243	3712.50844565045	2.5029476947945	0.268966013137782	9.30581401566273	1.32969833550274e-20	2.17522407097891e-19	yes	Bm18103	NA
WBGene00225349	4347.48868862661	1.94968209696773	0.209556812252488	9.3038354420978	1.35468691779539e-20	2.21272413478317e-19	yes	Bm5088a	NA
WBGene00220584	378.587321367899	-4.92392895729889	0.52925837465682	-9.30345024864585	1.35960548043185e-20	2.21737788779715e-19	yes	Bm323a	NA
WBGene00234319	8543.06425375708	2.01874125767835	0.217034512779155	9.301475750691	1.38509658721644e-20	2.25551822675139e-19	yes	Bm14058a	Bma-rpb-6
WBGene00227411	3265.16346870048	2.05994586479758	0.221492340118924	9.30030295265087	1.40046073028993e-20	2.27707689302831e-19	yes	Bm7150	NA
WBGene00224078	8959.46128345757	2.25831107720232	0.242975222759117	9.29440891774049	1.48026374585521e-20	2.40318576315736e-19	yes	Bm3817	NA
WBGene00229973	1214.04744895422	2.55251278794858	0.274672181265615	9.29294250399617	1.50080702497711e-20	2.43285132717546e-19	yes	Bm9712	NA
WBGene00223411	6224.04391380073	1.86648816616129	0.200907839795362	9.2902704447095	1.53896786654597e-20	2.49094270242298e-19	yes	Bm3150a	Bma-asb-1
WBGene00220737	7046.2737970712	2.06693064172603	0.222673339288525	9.28234447972164	1.65789661243899e-20	2.67939098073663e-19	yes	Bm476a	NA
WBGene00221089	5172.66886155732	2.60875208154047	0.281076208643048	9.28129810109059	1.6742616374876e-20	2.70176407314453e-19	yes	Bm828a	Bma-jip-1
WBGene00225321	4117.24461338547	3.03014063402423	0.326504991961878	9.28053386203057	1.68631492225643e-20	2.71712246495904e-19	yes	Bm5060a	Bma-irk-2
WBGene00230877	6409.86068764032	2.37903758819562	0.256398082113969	9.27868714376004	1.71579595841927e-20	2.76047352769706e-19	yes	Bm10616	NA
WBGene00225115	1964.92453285132	2.28985225505753	0.246856197887023	9.27605737533686	1.75865912157564e-20	2.82519227701394e-19	yes	Bm4854a	Bma-ptr-14
WBGene00227311	745.203281842839	-3.2849656325266	0.354294062489979	-9.27186193705832	1.82924335584208e-20	2.93418301764191e-19	yes	Bm7050a	Bma-tub-2
WBGene00226074	1604.58964450006	2.14309858311405	0.231267675164188	9.26674504594107	1.91913064926605e-20	3.07376456007261e-19	yes	Bm5813	Bma-eif-3.K
WBGene00234262	5480.20840904265	1.89295681029773	0.204618947075012	9.25113161492219	2.22128348656843e-20	3.55239590426578e-19	yes	Bm14001a	NA
WBGene00223597	1555.11685151424	-3.06406644759625	0.331450827283076	-9.24440730081322	2.36548038233591e-20	3.77736546896115e-19	yes	Bm3336	Bma-hbl-1
WBGene00229790	26059.9794465462	2.00759148365605	0.217270435986709	9.24005824602321	2.46363090532545e-20	3.92824481407175e-19	yes	Bm9529	NA
WBGene00226805	7631.05323489537	2.33149331571662	0.252557983434011	9.23151699271387	2.66825774363347e-20	4.24819936449221e-19	yes	Bm6544a	NA
WBGene00234189	1631.35685037021	-2.11726372110973	0.229449572721988	-9.2275775282228	2.76821457687994e-20	4.40080403431284e-19	yes	Bm13928a	Bma-xpo-2
WBGene00234334	11475.1759029283	2.12410592828502	0.230195077776665	9.22741680143926	2.77237039488817e-20	4.40088130092247e-19	yes	Bm14073	Bma-rpl-36.A
WBGene00227948	1098.98317499794	3.30085168268778	0.357933606950073	9.22196636078436	2.91700978415305e-20	4.62363311201183e-19	yes	Bm7687	NA
WBGene00226579	1249.99464265086	2.34064065517171	0.25384791451465	9.22064165721806	2.95327581628317e-20	4.67420241823843e-19	yes	Bm6318a	Bma-coa-5
WBGene00227226	1114.797904017	-4.45984583206712	0.484171567731551	-9.21129229657674	3.22221909151646e-20	5.09234182383464e-19	yes	Bm6965	NA
WBGene00225344	1111.92754878173	-4.03086286859127	0.437623154959422	-9.21080802720558	3.23679069705531e-20	5.1078368658244e-19	yes	Bm5083	Bma-zen-4
WBGene00231553	1351.9545607588	-6.15366252372449	0.669079802714584	-9.19720263376343	3.67389214405975e-20	5.7890815181765e-19	yes	Bm11292	NA
WBGene00227990	439.375388027115	2.84171963825633	0.309126484498661	9.19274077361894	3.8295706848938e-20	6.02552861800838e-19	yes	Bm7729	NA
WBGene00234300	11805.9203410334	2.26750319535831	0.246695810328799	9.19149454681115	3.87420588569001e-20	6.08682053741472e-19	yes	Bm14039	Bma-rps-8
WBGene00233918	12908.613489569	1.96752694126978	0.214180096709214	9.18632016466512	4.06509912777062e-20	6.37738464920384e-19	yes	Bm13657a	Bma-sar-1
WBGene00226694	2872.21086865937	2.26123195421716	0.246286528959482	9.18130587072901	4.25894815904096e-20	6.66650095119276e-19	yes	Bm6433a	Bma-mksr-2
WBGene00230197	715.661667560851	2.957435910791	0.32211751027357	9.18123298630767	4.2618321526524e-20	6.66650095119276e-19	yes	Bm9936	NA
WBGene00225288	11152.7664022918	1.77133769052403	0.192981349810373	9.17880247114335	4.35911974785486e-20	6.80874170528642e-19	yes	Bm5027a	NA
WBGene00223113	4465.01198788487	1.95952650837028	0.213503063301112	9.17797842369447	4.39260014449814e-20	6.851049570349e-19	yes	Bm2852a	Bma-xpo-3
WBGene00233982	12609.0709909663	2.12954647344143	0.232131156087046	9.17389336846656	4.56236322467669e-20	7.10548284192016e-19	yes	Bm13721a	Bma-rps-14
WBGene00268595	581.939771855778	3.02080254992575	0.329541389001234	9.16668634274174	4.87782536055457e-20	7.58576179076085e-19	yes	Bm17452	NA
WBGene00223283	1747.88778845335	2.74947367393909	0.300114023530758	9.1614301844089	5.12140026283389e-20	7.95301504583553e-19	yes	Bm3022a	Bma-unc-120
WBGene00231117	10073.8348141872	1.83048117923202	0.200021382433101	9.15142749722889	5.61861154512752e-20	8.69991657601754e-19	yes	Bm10856a	NA
WBGene00225096	6013.16462376041	2.32741711630344	0.254319759219636	9.15153869068203	5.61283037927575e-20	8.69991657601754e-19	yes	Bm4835	Bma-dgk-5
WBGene00268869	2775.28095975732	2.00032660298441	0.218710183633742	9.14601492143689	5.90725340093093e-20	9.13365370721139e-19	yes	Bm17727	NA
WBGene00221603	9098.84139727127	1.76906630063924	0.193450796589736	9.14478684929387	5.97475711364869e-20	9.22471505370975e-19	yes	Bm1342	NA
WBGene00229329	10753.9186012653	1.84353397324154	0.201606896683612	9.14420093542067	6.00723128160286e-20	9.2615083715647e-19	yes	Bm9068	NA
WBGene00223767	3253.71434921583	2.77588793560245	0.303941165595646	9.13297785827211	6.66404966977591e-20	1.02593810648921e-18	yes	Bm3506	NA
WBGene00225936	8831.39640250176	2.21517042429008	0.242580133089796	9.13170586591312	6.7428302542801e-20	1.03657713306472e-18	yes	Bm5675a	Bma-rps-17
WBGene00226335	1620.77334209654	2.23355446951804	0.244602260473089	9.131372969318	6.76359966898235e-20	1.0382803789849e-18	yes	Bm6074	Bma-ccb-1
WBGene00269363	2834.73772981178	1.95049999276545	0.213665138848673	9.12877038938428	6.92816909946093e-20	1.06202191560406e-18	yes	Bm18214	Bma-bicd-1
WBGene00222945	1378.9527481224	2.96950349273947	0.325720206477625	9.11673096628549	7.74244854561967e-20	1.18514765951878e-18	yes	Bm2684	NA
WBGene00222351	1540.97018346578	2.4423540674809	0.268117440985769	9.10926964878251	8.29384028821705e-20	1.26773892565258e-18	yes	Bm2090a	Bma-spe-6.2
WBGene00225841	12519.5025954492	1.80673805581021	0.19873367408806	9.09125272353005	9.7904409673097e-20	1.49436716473965e-18	yes	Bm5580	Bma-aldo-1
WBGene00227740	392.039598132009	-5.2203209594192	0.57472894079234	-9.0831009000909	1.05524716356931e-19	1.60838881332079e-18	yes	Bm7479	Bma-cya-1
WBGene00268335	5854.65181788705	-4.17472761169669	0.460292855286098	-9.06972064361473	1.19322545756388e-19	1.81610948548252e-18	yes	Bm17192	NA
WBGene00234163	9665.28120899559	1.96393814251572	0.216650784860388	9.06499435846172	1.24610700684338e-19	1.89390589763501e-18	yes	Bm13902	Bma-rps-22
WBGene00220652	705.190559650946	3.37324588291035	0.372178521465153	9.06351572796547	1.26312190602372e-19	1.91704691544535e-18	yes	Bm391a	NA
WBGene00226132	732.225569088012	2.5683037053974	0.283382578491619	9.06302610085592	1.26880658815621e-19	1.92295086168228e-18	yes	Bm5871	NA
WBGene00222241	395.537138594863	2.93310724177754	0.323729874858125	9.06035392335347	1.30027959628469e-19	1.96786664889696e-18	yes	Bm1980	Bma-let-756
WBGene00230387	4489.56686261645	2.65866290813765	0.293499026943031	9.05850672088838	1.32248577062258e-19	1.99865092132877e-18	yes	Bm10126	NA
WBGene00224372	2263.60367416596	1.96481506727978	0.216972989048097	9.05557450215259	1.35850746964666e-19	2.05019824468507e-18	yes	Bm4111	Bma-mrpl-14
WBGene00225896	29682.256905841	2.08716679847239	0.230684504403173	9.04771130541386	1.45996167428464e-19	2.20020947116174e-18	yes	Bm5635a	NA
WBGene00223193	6029.79842675734	3.02388564352756	0.334248561412626	9.04681722711921	1.47196124440287e-19	2.21517763114841e-18	yes	Bm2932	Bma-test-1
WBGene00226154	11754.2002290336	2.62531828114367	0.29020193140938	9.0465224279993	1.47593911686259e-19	2.21804875696812e-18	yes	Bm5893	Bma-pat-6
WBGene00222300	16599.6223339376	1.94741413972862	0.215519335516346	9.03591380821106	1.62637821546851e-19	2.44070624352172e-18	yes	Bm2039a	NA
WBGene00224985	1254.59047754159	2.18152735517771	0.241471076102473	9.03432158579495	1.65022832520955e-19	2.47303447617068e-18	yes	Bm4724	Bma-tdc-1
WBGene00229781	279.085864055548	3.28561887303551	0.363917084683806	9.02848206725513	1.74069474755631e-19	2.60496427654551e-18	yes	Bm9520	NA
WBGene00222310	1174.80272876511	2.82583111451349	0.313103552291845	9.02522853486992	1.7932068619383e-19	2.67980634946568e-18	yes	Bm2049a	NA
WBGene00222714	13727.4231138215	2.22719240410212	0.246790839520381	9.02461537239589	1.80327718924259e-19	2.69110237921091e-18	yes	Bm2453	Bma-bcl-7
WBGene00234289	17008.2605550839	1.91397652045788	0.212122407840985	9.0229813056463	1.83038814660525e-19	2.72776202932896e-18	yes	Bm14028	Bma-rpl-16
WBGene00223981	704.014434226463	-3.80390772160434	0.422071097879774	-9.01248093203452	2.01446768748051e-19	2.99791962102134e-18	yes	Bm3720	Bma-psf-2
WBGene00234011	27662.091011799	1.92413043246108	0.213633938216869	9.00667023470687	2.12407594246318e-19	3.15665377579652e-18	yes	Bm13750a	Bma-cnx-1
WBGene00222235	460.693400784187	-3.14302111481225	0.348992221653229	-9.00599188120379	2.13724988267182e-19	3.17183275523941e-18	yes	Bm1974a	Bma-attf-4
WBGene00220481	3272.1158000043	2.35053733439042	0.261032542014163	9.00476743724499	2.1612338563577e-19	3.20299042474036e-18	yes	Bm220	NA
WBGene00223592	21247.443802597	1.91556352131311	0.212861001630134	8.99912857049117	2.27516344688743e-19	3.36717905157443e-18	yes	Bm3331a	Bma-rpl-3
WBGene00227460	4201.21724163388	1.8253003003983	0.203193705153802	8.98305535113251	2.63349972173741e-19	3.89213096805742e-18	yes	Bm7199	NA
WBGene00226886	1845.47210494658	2.42495137272291	0.269981746151823	8.9819086189599	2.66109803846739e-19	3.92750213253141e-18	yes	Bm6625	NA
WBGene00233076	1763.72060981359	2.44233982375355	0.27201212120418	8.97879040441829	2.73759718477648e-19	4.03484922075379e-18	yes	Bm12815	NA
WBGene00233964	8590.66469065295	1.73875449745762	0.193718454528293	8.97567813914013	2.81611619761797e-19	4.14487432108194e-18	yes	Bm13703a	Bma-cct-5
WBGene00220812	1473.53309756135	2.88846851953291	0.32186382865448	8.97419424732461	2.85433245908486e-19	4.19535971180992e-18	yes	Bm551a	NA
WBGene00229176	1432.15776209766	2.13731262042408	0.238195331877681	8.97294083631177	2.88701176566489e-19	4.23757959850675e-18	yes	Bm8915	NA
WBGene00226750	515.515501137604	-4.47076468348354	0.498274420063318	-8.97249488126526	2.89872777307889e-19	4.24895596286461e-18	yes	Bm6489a	Bma-mcm-4
WBGene00223764	481.080264979858	2.88004525297853	0.321152549662505	8.96784178112592	3.02380993912811e-19	4.4262463794751e-18	yes	Bm3503	Bma-ttr-36.2
WBGene00222474	3419.20056890214	2.19427250203335	0.244713214889018	8.9667102899551	3.05502330151138e-19	4.46583556285054e-18	yes	Bm2213a	Bma-popl-4
WBGene00233939	12243.9522196823	1.86792719276911	0.208457808658223	8.96069667426883	3.22633438332451e-19	4.70983282252345e-18	yes	Bm13678a	Bma-aars-2
WBGene00228093	2554.96107428292	3.27881072469537	0.36613405123881	8.95521930724979	3.3906096220395e-19	4.94290912927254e-18	yes	Bm7832	NA
WBGene00222000	6610.97640018164	2.56231589546645	0.286304267188522	8.94962523831072	3.56691247181683e-19	5.19286238254312e-18	yes	Bm1739a	Bma-lat-2
WBGene00224618	4661.53584418544	2.32354389272943	0.2598079936293	8.94331179064764	3.77678265164899e-19	5.49093977102021e-18	yes	Bm4357	Bma-gtl-2
WBGene00224081	7658.22977962686	2.37542484102531	0.265673464372178	8.94114452355549	3.85160268170362e-19	5.59213045182307e-18	yes	Bm3820a	NA
WBGene00230937	4842.72420340439	2.6456057266023	0.296092997131503	8.93504997494863	4.06994213704576e-19	5.90114073050681e-18	yes	Bm10676a	NA
WBGene00228676	23246.6880032125	1.7736379371039	0.198517731767788	8.93440561359311	4.09372941266685e-19	5.92760954820612e-18	yes	Bm8415	NA
WBGene00224186	4660.09731535885	1.90579168450246	0.213366080212476	8.93202744599621	4.1827168738292e-19	6.04828762524695e-18	yes	Bm3925a	Bma-mob-1
WBGene00230674	350.367760801227	-5.59957218364278	0.627272727463006	-8.92685420309943	4.3829447772935e-19	6.32927941896225e-18	yes	Bm10413a	NA
WBGene00226725	21494.1725578305	2.22709929224789	0.249807036053783	8.91527847825869	4.86591839225827e-19	7.01726992907771e-18	yes	Bm6464a	Bma-pro-3
WBGene00226778	46063.5498334491	1.99369122995827	0.223788422876489	8.90882202185499	5.15776326984034e-19	7.42814965542194e-18	yes	Bm6517a	Bma-ced-2
WBGene00223880	4184.10907289465	2.21501438499645	0.248800028933496	8.90278990115599	5.4460203930257e-19	7.83276624312354e-18	yes	Bm3619	NA
WBGene00225922	6792.5553529722	1.96612778605799	0.220900525304717	8.90051204425998	5.55896328972861e-19	7.98448949724424e-18	yes	Bm5661	Bma-cest-16
WBGene00226205	1268.81310178084	3.5469646767418	0.398693396625943	8.89647209298926	5.76499511832878e-19	8.2693336938277e-18	yes	Bm5944	NA
WBGene00227336	543.732312488277	-3.26046615246639	0.366692826241937	-8.8915460547221	6.02644451333104e-19	8.63280119790669e-18	yes	Bm7075	NA
WBGene00226043	7994.72084450915	1.9692500384494	0.221503807141054	8.89036655336302	6.09076445451707e-19	8.71328987051407e-18	yes	Bm5782	Bma-ric-3
WBGene00234109	7563.91631490543	1.77022934062153	0.199374414516869	8.87891931826464	6.7513053805417e-19	9.64124405034164e-18	yes	Bm13848	Bma-gdi-1
WBGene00220711	1355.52243026559	4.36842251785694	0.492004927948244	8.87881862499652	6.75741883509712e-19	9.64124405034164e-18	yes	Bm450	NA
WBGene00230082	307.741267891937	-7.88899708685724	0.888567610576968	-8.87833068969814	6.78712069735296e-19	9.67074445108204e-18	yes	Bm9821	NA
WBGene00222744	11961.615017868	1.75752264151296	0.19805451918939	8.87393354469395	7.06067027206812e-19	1.00459849250077e-17	yes	Bm2483	Bma-rpn-3
WBGene00235043	438.344766067878	2.99696817082278	0.337732265687028	8.873798790667	7.06922317634701e-19	1.00459849250077e-17	yes	Bm14708a	NA
WBGene00225899	7036.2401970079	2.01046054576158	0.226613397258498	8.87176385016747	7.19963290136905e-19	1.02177571573734e-17	yes	Bm5638	NA
WBGene00222345	277.196377635682	3.35978645289228	0.378913155151097	8.86690368813541	7.52079079258602e-19	1.06594276908147e-17	yes	Bm2084	NA
WBGene00222936	3737.89874306381	2.13596113169766	0.240904197752815	8.86643384225836	7.55257813181624e-19	1.06903401165668e-17	yes	Bm2675a	Bma-madd-2
WBGene00230775	1534.29248805651	2.16167196731476	0.243821444475977	8.86579919974081	7.59572553487153e-19	1.07372294335288e-17	yes	Bm10514	NA
WBGene00220525	480.997891744725	-2.79114755097614	0.314835134948542	-8.86542587259943	7.62122054763253e-19	1.07590748574285e-17	yes	Bm264	NA
WBGene00229498	4557.41634035379	2.40996966874781	0.27199551759451	8.86032861887301	7.97789188740712e-19	1.12477778386273e-17	yes	Bm9237	NA
WBGene00223661	333.631398875066	3.9398441536136	0.444826719036221	8.85703125511396	8.21735004348784e-19	1.15701584383669e-17	yes	Bm3400a	NA
WBGene00225746	463.050694967223	-3.47542210322712	0.392455566181097	-8.85558112233119	8.3248948613886e-19	1.17062005826481e-17	yes	Bm5485	Bma-npp-2
WBGene00233916	11841.3783821633	1.70081109066785	0.19221638228777	8.84841900791547	8.87678191811527e-19	1.24658870580085e-17	yes	Bm13655	Bma-abcf-3
WBGene00230097	28236.9786477754	2.27717423270711	0.257623425104617	8.83915828610067	9.64424047940653e-19	1.35259210388535e-17	yes	Bm9836	Bma-moag-4
WBGene00222521	1841.83105937957	1.99473278481189	0.225707950247042	8.83767179059762	9.77338907659656e-19	1.3689132543233e-17	yes	Bm2260a	NA
WBGene00222353	25177.0477753605	2.07978311329359	0.235355459898169	8.83677444404072	9.85217691482908e-19	1.37814720159783e-17	yes	Bm2092a	Bma-unc-89
WBGene00227337	28858.7413948524	1.69384152044592	0.191826158086423	8.83008624758465	1.04595039339264e-18	1.46119406325974e-17	yes	Bm7076a	Bma-swsn-3
WBGene00229501	40917.4999967752	2.13919350127318	0.242289991904723	8.82906258098512	1.05556652823177e-18	1.47270772786502e-17	yes	Bm9240	NA
WBGene00226801	661.155533907554	-3.34858024366647	0.379712585556661	-8.81872334770635	1.15772087155887e-18	1.61313122740615e-17	yes	Bm6540	Bma-klp-19
WBGene00224953	1288.34708376845	-2.19197500516853	0.248618349829668	-8.81662599188791	1.17960449381508e-18	1.64148859106865e-17	yes	Bm4692a	Bma-hpo-11
WBGene00234143	33593.3264984935	2.07493442160577	0.235448710613759	8.81268118307767	1.22187677614271e-18	1.69810760782998e-17	yes	Bm13882a	Bma-rps-6
WBGene00229621	490.598923499162	-6.75407312570764	0.766455236329333	-8.81209078569792	1.22833083118436e-18	1.70486591400783e-17	yes	Bm9360	NA
WBGene00224856	1196.12392818663	-2.15000094039859	0.244037997308643	-8.81010729521522	1.25026132096837e-18	1.73305951541734e-17	yes	Bm4595a	NA
WBGene00233930	4453.31498735909	1.83716082740618	0.208578995861934	8.80798576968058	1.27414605956771e-18	1.76388566256693e-17	yes	Bm13669	Bma-pas-5
WBGene00223010	7227.78613155236	2.50966227437999	0.285075007704761	8.80351558905903	1.32595746725702e-18	1.83324313053665e-17	yes	Bm2749	Bma-ost-1
WBGene00226479	7214.80430998976	2.5316685652453	0.287664846265678	8.80075754166754	1.35895667210412e-18	1.87644597185511e-17	yes	Bm6218	Bma-rme-1
WBGene00269132	577.796476461636	2.7081645542273	0.307811517674354	8.79812612175342	1.39119634234745e-18	1.91849019411235e-17	yes	Bm17990	NA
WBGene00230277	670.77616730125	-4.97912320815109	0.566347232172235	-8.79164393379937	1.47387245891503e-18	2.02988989682192e-17	yes	Bm10016	NA
WBGene00268558	3495.82607043037	1.82843774699409	0.207996113260062	8.79073035710029	1.48590806362658e-18	2.04383888340935e-17	yes	Bm17415	NA
WBGene00225510	315.61360162637	-3.2465057472169	0.36934216137436	-8.78996791250779	1.49602689088972e-18	2.05511899177992e-17	yes	Bm5249	Bma-wve-1
WBGene00227211	1488.52328826979	2.0795590232316	0.23669315080618	8.78588592930805	1.55136968199305e-18	2.12841563925167e-17	yes	Bm6950	NA
WBGene00234329	5787.47114572241	1.78196935426783	0.202856779302256	8.78437171484767	1.57240915173558e-18	2.1545222584203e-17	yes	Bm14068	NA
WBGene00231228	835.434180621358	2.4306499845588	0.276826954671921	8.78039491291396	1.62901657407246e-18	2.22923532454489e-17	yes	Bm10967	NA
WBGene00222823	4282.42642226698	2.12853101740725	0.242438969142073	8.77965710273211	1.63973800902749e-18	2.24104499575632e-17	yes	Bm2562a	Bma-prx-5.1
WBGene00224243	2755.04103201325	2.70961050390569	0.308632432305208	8.77940948612341	1.64335182554137e-18	2.24312290581857e-17	yes	Bm3982a	NA
WBGene00228834	1756.7295781401	-1.97611686528327	0.225196233957799	-8.77508842200967	1.70769633273639e-18	2.32798552229904e-17	yes	Bm8573	NA
WBGene00230338	949.654090288514	2.88930365723547	0.329328245751454	8.77332477401908	1.73466791607443e-18	2.36174926565915e-17	yes	Bm10077	NA
WBGene00230078	371.882166436302	2.90578233735195	0.331250263408236	8.77216611831288	1.75261582650836e-18	2.38315718033466e-17	yes	Bm9817a	NA
WBGene00226783	1136.80948449058	-2.31849048006645	0.264383906304293	-8.76940851837624	1.79607274204279e-18	2.43915328656381e-17	yes	Bm6522	Bma-fcd-2
WBGene00234968	7724.46590471188	1.71550833181638	0.195643220477145	8.76855496261256	1.80973828892198e-18	2.45460072984798e-17	yes	Bm14783	Bma-vps-18
WBGene00222239	571.745221058422	-2.83911545579678	0.324122882928374	-8.75937986897451	1.96327448956035e-18	2.65947991853846e-17	yes	Bm1978a	NA
WBGene00221121	295.315373328965	4.40792311063545	0.503248763953366	8.75893479798771	1.97104084393056e-18	2.66662912155504e-17	yes	Bm860	NA
WBGene00229461	1716.20452615405	3.1949658508543	0.364862184187317	8.75663740809607	2.01161461820714e-18	2.71808961337825e-17	yes	Bm9200a	Bma-kcc-1
WBGene00223889	776.94546213943	-2.41073552937118	0.276100070764505	-8.73138323614331	2.51576659769406e-18	3.39501751817278e-17	yes	Bm3628	Bma-nhl-2
WBGene00221226	1793.66322843508	1.94205287601904	0.222574708117098	8.72539783359983	2.65246478434917e-18	3.57498869991212e-17	yes	Bm965a	Bma-cht-4
WBGene00222322	926.808868722619	-2.26152719628644	0.259332725032052	-8.72056234324817	2.76823475447049e-18	3.72633610479288e-17	yes	Bm2061	Bma-wdr-20
WBGene00226585	11035.343175312	1.87234947545241	0.214822324395638	8.71580493656755	2.88700023177103e-18	3.88133092640233e-17	yes	Bm6324	Bma-emb-9
WBGene00226983	2765.42513808957	1.85421547772296	0.212922636751902	8.70839994285577	3.08194213512702e-18	4.13822180174011e-17	yes	Bm6722a	NA
WBGene00222944	3358.61761184537	2.14644743167885	0.24654053970942	8.70626564786756	3.14050312030457e-18	4.21157583655363e-17	yes	Bm2683	Bma-elo-4
WBGene00223178	14147.1970491434	1.94809878492708	0.223804872608456	8.70445206228932	3.1911268301347e-18	4.27411549811166e-17	yes	Bm2917	NA
WBGene00228100	4768.23166329484	2.0968191419202	0.24092921439248	8.70305059188223	3.23079800434115e-18	4.32184776735523e-17	yes	Bm7839	Bma-ptd-2
WBGene00268404	197.36069044736	4.44189315658934	0.510669994659351	8.69816751139328	3.37286402308756e-18	4.50626409069616e-17	yes	Bm17261	NA
WBGene00223456	24978.5287010381	2.28114601650143	0.262436965691299	8.69216731908382	3.5558986888679e-18	4.74488847462261e-17	yes	Bm3195a	Bma-unc-98
WBGene00222606	7561.17804522382	2.14899105146519	0.247243097379641	8.69181414664701	3.56697258242981e-18	4.75374517670838e-17	yes	Bm2345a	NA
WBGene00226795	2453.44939741075	2.75821203795632	0.317618961371805	8.68402826469657	3.81993807509272e-18	5.08455111485944e-17	yes	Bm6534	NA
WBGene00228329	2840.8695578563	3.28474742645317	0.378681851081132	8.67416121759006	4.16609758601163e-18	5.5384287387239e-17	yes	Bm8068	Bma-pgal-1
WBGene00226286	1733.30765371658	2.93899204337983	0.338990751001271	8.66982958885746	4.3276758799638e-18	5.74610248498292e-17	yes	Bm6025	NA
WBGene00226283	495.025818212566	-2.76829361334344	0.319387017569249	-8.66752078532192	4.41631040725749e-18	5.85653044724802e-17	yes	Bm6022a	NA
WBGene00229056	2338.46153370084	-3.63192149111523	0.419192509323701	-8.66408967320228	4.55135039941619e-18	6.02814827314517e-17	yes	Bm8795	Bma-hcp-6
WBGene00223040	355.431169444358	3.2365126663023	0.373869159264147	8.65680569285908	4.85168714827528e-18	6.41800343132959e-17	yes	Bm2779	NA
WBGene00230587	398.583102028363	-4.24726842328417	0.490774403758417	-8.65421747906576	4.96304941244443e-18	6.55722249745278e-17	yes	Bm10326	Bma-cdk-1.2
WBGene00227895	2814.19177647612	2.25896070821947	0.261029536976752	8.65404250562135	4.97066834587792e-18	6.55920090222684e-17	yes	Bm7634a	Bma-gtf-2H3
WBGene00303191	10412.859795632	9.3234812527	1.07771764578013	8.65113537781134	5.09895717797153e-18	6.72021232004489e-17	yes	Bm18564	NA
WBGene00225872	5199.61996889497	2.33407210723942	0.26988456884653	8.64840890020167	5.2222416764552e-18	6.874240732582e-17	yes	Bm5611a	Bma-srap-1
WBGene00226493	596.311383746999	-4.18156424471819	0.483586871704658	-8.64697635396521	5.28819229049585e-18	6.9525129316151e-17	yes	Bm6232	Bma-egl-20
WBGene00222097	583.832077892934	-2.56755452129716	0.29702046368975	-8.64436910979666	5.41033944536427e-18	7.10438568101447e-17	yes	Bm1836a	Bma-fkb-7
WBGene00220749	910.273043663195	-4.6765080660961	0.541072057401178	-8.64304116637963	5.47361872393685e-18	7.17868110489392e-17	yes	Bm488	Bma-rmh-1
WBGene00222278	530.09116524986	-2.86040052759319	0.331031664810778	-8.64086681625528	5.57881209321829e-18	7.30769823702127e-17	yes	Bm2017	NA
WBGene00223600	18637.967397211	1.80248844198146	0.208627674120988	8.63973799054175	5.63420820027699e-18	7.37125041098509e-17	yes	Bm3339a	Bma-ldh-1
WBGene00226634	4008.19306958145	-9.26252806838492	1.07227679577022	-8.63818755094068	5.71118063163583e-18	7.46284152048511e-17	yes	Bm6373a	NA
WBGene00224968	465.526998539911	-3.41238433105035	0.395344074950219	-8.63142904438375	6.05901454017696e-18	7.90771507892767e-17	yes	Bm4707a	Bma-lin-54
WBGene00223594	2150.63309887568	2.09021823842933	0.242215927141389	8.62956562393688	6.15854090523651e-18	8.02783038924686e-17	yes	Bm3333a	NA
WBGene00224611	51482.8162531752	1.72350403176978	0.199803214889964	8.62600750803212	6.35308516831877e-18	8.27136179569084e-17	yes	Bm4350	Bma-rpl-5
WBGene00223867	469.455523593192	2.74621305077957	0.318490181349618	8.62259878512535	6.545145811402e-18	8.51107249625879e-17	yes	Bm3606a	NA
WBGene00225139	14985.3730474845	1.78538050637481	0.207097932461835	8.62094799861815	6.6402061927735e-18	8.62421931582644e-17	yes	Bm4878a	Bma-vem-1
WBGene00227323	4728.43371179061	2.76958030051375	0.321873819327537	8.60455288441909	7.66148216436468e-18	9.93859338876121e-17	yes	Bm7062	NA
WBGene00225071	539.699367801044	-4.08981778649068	0.475674377995744	-8.59793584788643	8.11626442497107e-18	1.05158129762473e-16	yes	Bm4810a	Bma-cdc-48.3
WBGene00234594	1233.43328712088	-5.60198659756919	0.65159569097109	-8.5973352420738	8.15883896784976e-18	1.05582076739747e-16	yes	Bm14333	NA
WBGene00226352	5504.5900880173	2.2083265142904	0.256948970401237	8.59441666896739	8.36888344498472e-18	1.08169585178542e-16	yes	Bm6091a	Bma-plin-1
WBGene00225960	20308.8180920111	1.85646495438487	0.216090502359752	8.5911455344492	8.61064843433306e-18	1.11160359004673e-16	yes	Bm5699	NA
WBGene00234989	1356.81092273466	2.10529843168939	0.24506789174949	8.59067426850613	8.64604241676681e-18	1.11482965698744e-16	yes	Bm14804	NA
WBGene00223031	942.967510685971	-2.7536985205165	0.320610021649294	-8.58893463888255	8.77794339198626e-18	1.13047672410015e-16	yes	Bm2770a	Bma-sym-1
WBGene00224495	1272.30244508728	-4.65322709402735	0.54182647088706	-8.58803942599786	8.8465915478317e-18	1.13794992118868e-16	yes	Bm4234	Bma-efl-3
WBGene00225077	2936.58081684597	1.91103718756284	0.222559667883661	8.5866285016286	8.95586343154803e-18	1.15062442049205e-16	yes	Bm4816	Bma-nuo-4
WBGene00228692	2697.12995917447	2.7008861098963	0.315137072261165	8.5705121600482	1.03025804937781e-17	1.32206167653691e-16	yes	Bm8431a	NA
WBGene00226691	412.571879653984	3.30903704844486	0.38620371828985	8.56811286824897	1.05194667003796e-17	1.34827853701636e-16	yes	Bm6430a	Bma-oig-2
WBGene00229734	618.484058691966	-2.49528179339603	0.291242755742915	-8.56770424050876	1.05568514037093e-17	1.35145355783447e-16	yes	Bm9473	NA
WBGene00224467	4881.55912016662	2.32000824771729	0.270807008492533	8.56701700828123	1.06200211001347e-17	1.35791797240983e-16	yes	Bm4206a	NA
WBGene00220928	710.116902332769	2.35664035810986	0.275408773307219	8.5568819388372	1.15961181435021e-17	1.48095835408373e-16	yes	Bm667a	NA
WBGene00227623	2660.63345690116	2.16304397247836	0.25278880968114	8.55672359550551	1.16120498936133e-17	1.48122755488174e-16	yes	Bm7362	Bma-cyn-17
WBGene00229763	6536.09667328446	2.51560377705246	0.294261047831791	8.54888472527448	1.24283566902214e-17	1.58347017759479e-16	yes	Bm9502a	Bma-hsp-43
WBGene00223381	6713.6638769049	3.06473401410355	0.358682322126562	8.54442448106531	1.29178403629281e-17	1.643879566375e-16	yes	Bm3120a	Bma-egl-21
WBGene00222842	831.177103283695	-2.43495658923465	0.285242231863507	-8.53645188977423	1.38406271517388e-17	1.7592208769974e-16	yes	Bm2581a	Bma-prmt-5
WBGene00225350	11404.0575259185	1.75132831334767	0.205265461151575	8.53201655808243	1.43818465335692e-17	1.82584698586722e-16	yes	Bm5089a	Bma-calu-1
WBGene00225490	6434.91539598191	2.16570790094107	0.253889020427828	8.53013610943724	1.46175629789868e-17	1.85357618129992e-16	yes	Bm5229	NA
WBGene00229620	277.058490454942	-6.01471988604889	0.705170792218303	-8.5294512370939	1.47043562287768e-17	1.86237797862108e-16	yes	Bm9359	NA
WBGene00228135	615.122870350107	-4.66589143576711	0.547247837331	-8.52610301490322	1.51360480615616e-17	1.9147904956273e-16	yes	Bm7874	Bma-ref-2
WBGene00225808	3767.76348035552	3.90170750457725	0.457668809209914	8.52517677862485	1.52576617025568e-17	1.92789911725113e-16	yes	Bm5547	Bma-pde-1
WBGene00223002	550.783213793816	2.90956058468594	0.341443924604076	8.52134237872222	1.57714545853843e-17	1.99047274301994e-16	yes	Bm2741	Bma-acer-1.2
WBGene00229405	279.121525392603	-4.08910746580429	0.479996163925655	-8.51904196975549	1.60878540940542e-17	2.0280159602093e-16	yes	Bm9144	NA
WBGene00269273	1816.86150073555	2.30968513012575	0.271218756353773	8.51594912231307	1.65231368434568e-17	2.08043961548342e-16	yes	Bm18133	Bma-blos-1
WBGene00224022	627.353502641733	-5.46463908225996	0.642079070398829	-8.51085066340129	1.72661897058753e-17	2.17144627580345e-16	yes	Bm3761	Bma-mcm-7
WBGene00224504	1148.23760865685	-2.27275794576094	0.267807535218666	-8.48653471944029	2.12890078149676e-17	2.67422882458826e-16	yes	Bm4243	NA
WBGene00255629	157.93513983414	-5.5064295582386	0.649072848998707	-8.48353088059853	2.18461203674303e-17	2.74099742080815e-16	yes	NA	NA
WBGene00226422	583.460567333026	2.83752951086079	0.334662078627442	8.47879007534532	2.27547814910909e-17	2.85166647575484e-16	yes	Bm6161	Bma-tni-4
WBGene00227254	2959.25759373929	2.81790988679767	0.332372419030065	8.47817004497828	2.28763456971785e-17	2.8635519175849e-16	yes	Bm6993	NA
WBGene00234275	5008.94707563999	2.15902227982119	0.254873044842411	8.4709714248367	2.43354937448029e-17	3.04264662165184e-16	yes	Bm14014	NA
WBGene00225895	6091.33865275322	2.25926475750668	0.266983203524881	8.46219809964985	2.62384314301889e-17	3.27674583653233e-16	yes	Bm5634	Bma-rps-24
WBGene00222049	600.913426121723	-5.68458592553951	0.671861367625376	-8.4609507250448	2.6520645291497e-17	3.30813404305461e-16	yes	Bm1788	Bma-mboa-1
WBGene00230761	6515.46410467584	2.04868560466079	0.242179238245084	8.45937752346687	2.68808497674698e-17	3.3491663402144e-16	yes	Bm10500a	NA
WBGene00227086	607.468670838836	2.58068635862565	0.305359477319211	8.45130592075222	2.8806236101248e-17	3.58488757055601e-16	yes	Bm6825a	Bma-ubc-13.1
WBGene00229415	272.3804586281	-7.12716225290708	0.843550931168696	-8.44900051622581	2.93807172970124e-17	3.6521390468386e-16	yes	Bm9154	NA
WBGene00229354	343.91243134725	-4.97488959821108	0.588863295222961	-8.44829290358035	2.95593028418621e-17	3.67008030070165e-16	yes	Bm9093	NA
WBGene00225018	5484.31502765695	2.50270807392504	0.296298705377963	8.44657107337862	2.99983396296007e-17	3.72028019827745e-16	yes	Bm4757	Bma-dsc-4.1
WBGene00225616	2150.62634652106	2.02149395784431	0.239483671133414	8.44105131793372	3.14496024453202e-17	3.89575133181047e-16	yes	Bm5355	NA
WBGene00232040	1700.18237877115	2.47264931379244	0.293001469511064	8.43903383119064	3.19971478846704e-17	3.95900045709288e-16	yes	Bm11779	Bma-nhx-1
WBGene00222407	572.255029401074	-3.64534259751383	0.432037417093233	-8.43756224180734	3.24024581290781e-17	4.00452524628687e-16	yes	Bm2146	Bma-viln-1
WBGene00221698	5805.28879904945	1.85723781544404	0.220120108526231	8.43738369873975	3.24519763113411e-17	4.00602449511544e-16	yes	Bm1437	NA
WBGene00222063	637.185811360104	-3.05236086347525	0.36180739383274	-8.43642478154088	3.27192079606174e-17	4.03436494013827e-16	yes	Bm1802a	Bma-tmc-2
WBGene00224346	647.246436800215	-4.89160369913084	0.580456115550517	-8.42717230137464	3.5411824411737e-17	4.36135285714668e-16	yes	Bm4085	NA
WBGene00228643	369.340717128856	2.82360807199728	0.335295736691898	8.42124656834477	3.72499374177746e-17	4.58246933905229e-16	yes	Bm8382	NA
WBGene00230113	788.123144028671	2.33762385351516	0.27771609352677	8.41731504944213	3.85210737124823e-17	4.73340945905101e-16	yes	Bm9852	NA
WBGene00221769	1891.60886134789	2.0281945962763	0.241017370760858	8.41513866769674	3.92430415445899e-17	4.81660011626896e-16	yes	Bm1508	NA
WBGene00224039	2160.23500583868	-2.24281264918713	0.266565854788598	-8.41372819848143	3.97180456909986e-17	4.86932333614474e-16	yes	Bm3778a	NA
WBGene00233095	6991.31277243613	3.39745096701027	0.403951298686285	8.41054596942583	4.08106577685591e-17	4.99755654845841e-16	yes	Bm12834	NA
WBGene00229801	6627.259597679	2.65167137209637	0.315373830691599	8.40802601243544	4.16968688497618e-17	5.10025056763924e-16	yes	Bm9540a	NA
WBGene00224323	510.80854490589	-3.89927518504809	0.463883208378553	-8.40572608497197	4.25222545673695e-17	5.19527887901213e-16	yes	Bm4062a	Bma-dna-2
WBGene00226486	3281.27378055012	2.43494123021337	0.289692760268113	8.40525399378229	4.269365910049e-17	5.21027969546413e-16	yes	Bm6225	Bma-sms-5
WBGene00230071	1437.80839869472	3.5770776612217	0.425597287093751	8.40484131289524	4.28440513883618e-17	5.22268499006026e-16	yes	Bm9810	NA
WBGene00231151	909.239365222421	4.65662462581954	0.554094840589234	8.40402090888918	4.31445829429723e-17	5.25334325265851e-16	yes	Bm10890	NA
WBGene00220263	2675.21221460266	-1.78952197219075	0.212968237959832	-8.40276460628023	4.36088281843378e-17	5.30384329165925e-16	yes	Bm2a	NA
WBGene00230390	870.098053371761	-2.28333184897707	0.271757286713214	-8.40209981705724	4.38564797597805e-17	5.32791588011393e-16	yes	Bm10129	NA
WBGene00230439	340.233172752843	-3.33209518697014	0.396744984055854	-8.39858176127828	4.51903260701038e-17	5.48374115335404e-16	yes	Bm10178	NA
WBGene00222693	22670.6408446374	1.79886384734316	0.21430437685938	8.39396690681463	4.70008489673167e-17	5.69699204394569e-16	yes	Bm2432a	NA
WBGene00227652	4546.32912462796	1.88652624358948	0.224865302622213	8.38958354886325	4.87867266047683e-17	5.90677712508579e-16	yes	Bm7391	NA
WBGene00230685	156.295455602037	3.98762764059633	0.47581443244782	8.38063616541021	5.26423924121308e-17	6.36640219747157e-16	yes	Bm10424	NA
WBGene00222026	11321.952728816	2.18387797275163	0.260838335955362	8.37253452316675	5.63919954173718e-17	6.81217847685613e-16	yes	Bm1765a	Bma-rpl-23
WBGene00222105	3247.92185552855	2.18710231350814	0.261331158108305	8.36908361536334	5.80680363179868e-17	7.00674559850482e-16	yes	Bm1844	Bma-rpl-29
WBGene00231297	649.895320097678	-2.50986189828445	0.300267174046445	-8.35876217989858	6.33797304486329e-17	7.63907549783017e-16	yes	Bm11036	NA
WBGene00225869	3200.58447318238	1.79148794540023	0.214414235832807	8.35526586395675	6.52855044952388e-17	7.85993461423016e-16	yes	Bm5608a	Bma-mel-46
WBGene00269162	263.590076737759	-10.6338285312508	1.27319157775912	-8.35210404860424	6.70575488107563e-17	8.06421588672563e-16	yes	Bm18020	NA
WBGene00268963	2370.31569725497	3.57870917161499	0.428504209542719	8.35163130703904	6.73265424393936e-17	8.08748769325227e-16	yes	Bm17821	NA
WBGene00224246	26193.4792058176	2.28646366157627	0.273788576181143	8.35120184146582	6.75718340511816e-17	8.10786340266978e-16	yes	Bm3985a	Bma-ctsa-1.1
WBGene00224544	4854.97661301017	2.45141966953524	0.2936509524958	8.34807327781547	6.93855239343028e-17	8.316173254542e-16	yes	Bm4283a	Bma-frpr-8
WBGene00222472	2959.6956455719	2.48695539853708	0.298034222147587	8.3445296335987	7.14978771828191e-17	8.55977378786488e-16	yes	Bm2211a	Bma-sol-1
WBGene00230129	3182.03690239621	1.85109743878173	0.22185489429528	8.3437304579722	7.19829575037976e-17	8.60822979523651e-16	yes	Bm9868	Bma-timm-23.4
WBGene00233176	165.880159162958	-5.11689796685081	0.613558231082641	-8.33971040991806	7.44726897708455e-17	8.89604092413165e-16	yes	Bm12915	NA
WBGene00228026	650.612578241111	-2.57945542269105	0.309438873887967	-8.33591264821157	7.69026807388635e-17	9.17608267390782e-16	yes	Bm7765a	Bma-pbrm-1.1
WBGene00223726	368.006682352068	-7.25111040230561	0.870213453410851	-8.33256527336423	7.9109216787534e-17	9.42886827450975e-16	yes	Bm3465	NA
WBGene00224068	587.056542901569	-2.78269163625973	0.33407039440248	-8.32965651217571	8.10772449064743e-17	9.65269643525414e-16	yes	Bm3807a	Bma-dog-1
WBGene00230069	1250.79716701438	-2.87595010853278	0.345322427154222	-8.3283038759842	8.20087907649724e-17	9.7527657385869e-16	yes	Bm9808	Bma-saps-1
WBGene00227611	12603.9054931338	2.48341649005684	0.29830134963383	8.32519361077405	8.41910228985246e-17	1.0001184150307e-15	yes	Bm7350	Bma-cubn-1
WBGene00230716	2636.99193246435	-3.60356575926462	0.432863815470437	-8.3249410795593	8.43706974086418e-17	1.00114288231849e-15	yes	Bm10455	NA
WBGene00224895	848.064967753142	2.37343755881653	0.285244267865395	8.32071955933762	8.74308928309834e-17	1.03516244937457e-15	yes	Bm4634a	NA
WBGene00230763	11020.946311809	1.96044158261044	0.235606144099411	8.3208423536835	8.73403522468801e-17	1.03516244937457e-15	yes	Bm10502	NA
WBGene00227614	275.179047461976	3.06199601597312	0.368203834567179	8.31603511020594	9.09548867433684e-17	1.07451114824167e-15	yes	Bm7353	Bma-cutl-19
WBGene00225058	661.785837502581	2.40532034712304	0.289237953585278	8.31606059062323	9.09353446782722e-17	1.07451114824167e-15	yes	Bm4797	NA
WBGene00228988	6986.52068232624	-3.69861659767984	0.444818371804572	-8.31489172237878	9.18360771720047e-17	1.08372639526215e-15	yes	Bm8727a	Bma-shp-1
WBGene00221988	2026.36771465343	-1.96588231093945	0.236508693055586	-8.31209324926342	9.40284897365297e-17	1.10837763204281e-15	yes	Bm1727a	Bma-let-363
WBGene00223756	5174.67559113053	2.45772619492172	0.295786863641615	8.30911205678012	9.64208379563392e-17	1.1353288776947e-15	yes	Bm3495	NA
WBGene00269751	225.523254147293	3.3024265575338	0.397845800232081	8.30077018685972	1.0343861143335e-16	1.21662428266558e-15	yes	NA	NA
WBGene00269124	1263.55275175411	2.83015567271432	0.341307072087632	8.29210966946407	1.11257275796572e-16	1.30715099798275e-15	yes	Bm17982	NA
WBGene00234111	1352.36385011159	2.03136863379603	0.245012318868212	8.29088367139885	1.12410182159997e-16	1.31924983772658e-15	yes	Bm13850	Bma-fbp-1
WBGene00268871	335.75161232856	-3.97069479719663	0.478953719858752	-8.29035172410317	1.12914072846112e-16	1.32371366580536e-15	yes	Bm17729	NA
WBGene00225037	631.306269232247	-4.33717302270219	0.523868645352512	-8.2791231374111	1.24085575149314e-16	1.45308954942612e-15	yes	Bm4776	Bma-lron-7
WBGene00222334	1569.64224239949	2.02970041664808	0.245171077066901	8.27871069022645	1.24516038009329e-16	1.45653858872267e-15	yes	Bm2073	Bma-tmd-2
WBGene00223554	387.030255359862	-3.56159556985851	0.430486823703383	-8.2734136650662	1.30177072998356e-16	1.52109851382484e-15	yes	Bm3293	Bma-kpc-1
WBGene00226666	570.398189371287	-2.51238132655728	0.303721432468616	-8.27199222042682	1.31738901789004e-16	1.53767138634986e-15	yes	Bm6405	Bma-taf-2
WBGene00227930	820.522714624862	2.90005403951189	0.350686806852233	8.26964112377877	1.34362845012524e-16	1.5665918218816e-15	yes	Bm7669a	Bma-acer-1.1
WBGene00220269	945.56965360982	2.34442476984368	0.283662536352701	8.26483750722962	1.3988515320786e-16	1.62920588763284e-15	yes	Bm8a	NA
WBGene00231025	186.221449862137	-6.35555988180593	0.769708628377211	-8.25709839735778	1.49256377706067e-16	1.73646263531e-15	yes	Bm10764	NA
WBGene00224965	93385.3628413519	1.77724242969842	0.215256510141171	8.25639340028722	1.50140197918278e-16	1.74485056474441e-15	yes	Bm4704	Bma-rpl-12
WBGene00221934	773.720772197003	2.2111545804591	0.267839832887607	8.25551060355895	1.5125419573694e-16	1.75589242396675e-15	yes	Bm1673a	NA
WBGene00227676	608.172503132125	2.64850002632902	0.320839985390803	8.25489386275522	1.52037289937323e-16	1.76307311869959e-15	yes	Bm7415a	NA
WBGene00232889	1911.5474288125	-3.6454732181633	0.441799014132479	-8.25142904703303	1.56511550324774e-16	1.81299595862698e-15	yes	Bm12628a	NA
WBGene00225879	1181.45175440979	-3.06464011117387	0.371413752595638	-8.25128334574723	1.56702517985837e-16	1.8132478188102e-15	yes	Bm5618	Bma-atl-1
WBGene00224013	1190.65177208139	2.78975501035336	0.338276171619469	8.2469746449998	1.62454869457055e-16	1.87778201319562e-15	yes	Bm3752a	NA
WBGene00225457	2074.68705844084	2.14930309766218	0.260635243873657	8.24640238871169	1.63234357350146e-16	1.88475877048148e-15	yes	Bm5196a	NA
WBGene00225120	2124.07753359495	2.21640552685822	0.268962457117466	8.24057584323088	1.71383784450659e-16	1.97672470440131e-15	yes	Bm4859	NA
WBGene00230576	1611.67464948529	3.14554865417217	0.381836178620391	8.23795342164098	1.75181354980911e-16	2.01835292324781e-15	yes	Bm10315	NA
WBGene00228516	1431.93501073486	2.09352831203193	0.254163568352614	8.23693311201658	1.76681194761801e-16	2.03344683337562e-15	yes	Bm8255a	NA
WBGene00233169	444.515636037171	-3.44531276010679	0.418578474665794	-8.23098407737672	1.85681652480707e-16	2.13474131580555e-15	yes	Bm12908	NA
WBGene00223194	384.649810757725	-3.70726775179512	0.45045936947359	-8.22997145364621	1.87258063072038e-16	2.15055749819602e-15	yes	Bm2933	Bma-gcy-35
WBGene00221935	535.712720480687	4.09132463955447	0.497479033132611	8.22411472055721	1.96637815069097e-16	2.25586101548755e-15	yes	Bm1674	NA
WBGene00221802	6756.47500481615	2.11043635874894	0.256794355754604	8.21839075297164	2.06252002480766e-16	2.36362588939188e-15	yes	Bm1541a	Bma-cpna-2
WBGene00222735	1243.69311087991	2.5721964314944	0.313272219470219	8.21073900470424	2.1983125794598e-16	2.51655120608032e-15	yes	Bm2474	Bma-rgs-3
WBGene00269266	3120.9795772567	2.89612390835886	0.352842172827778	8.20798683204023	2.24927874469315e-16	2.57214746524943e-15	yes	Bm18126	Bma-lect-2
WBGene00225433	3432.3111061489	2.04424464755677	0.24907535774633	8.20733398138374	2.26153847286526e-16	2.58065865141121e-15	yes	Bm5172	Bma-cor-1
WBGene00224430	539.269962567296	3.62796867267386	0.442039629982205	8.20733804527868	2.26146195457693e-16	2.58065865141121e-15	yes	Bm4169a	Bma-lgc-47
WBGene00231124	646.019599255344	-4.12274077618648	0.502395907024876	-8.20615916359833	2.28376624174684e-16	2.60325056173589e-15	yes	Bm10863	NA
WBGene00234044	11972.5122604511	1.76489230355106	0.215242508258121	8.19955276415281	2.41282999406649e-16	2.74744669356242e-15	yes	Bm13783	Bma-rps-15
WBGene00226935	11224.1791253022	1.96950211564484	0.240395961427238	8.19274210744577	2.55340907526207e-16	2.90443505747698e-15	yes	Bm6674	Bma-rpl-17
WBGene00227506	618.747600411673	-2.98183371078577	0.364183724166245	-8.18771821176886	2.6622524867226e-16	3.0250302646058e-15	yes	Bm7245	Bma-zoo-1
WBGene00221056	2462.43175175782	3.79054947267952	0.463322993829231	8.18122459529091	2.80973647307854e-16	3.18922948188947e-15	yes	Bm795	NA
WBGene00226434	4917.15292349705	1.69027342443444	0.206622899275639	8.1804748184255	2.82727572062744e-16	3.2057417297908e-15	yes	Bm6173	NA
WBGene00226027	3670.15659136504	1.89513122745652	0.231680351264389	8.17993937385666	2.83986718240383e-16	3.21661489000603e-15	yes	Bm5766	NA
WBGene00225623	12931.9213132265	2.00196280906687	0.244749357030842	8.17964481440739	2.84681756418585e-16	3.22108238651018e-15	yes	Bm5362a	Bma-mdt-15
WBGene00234220	7030.80707653822	1.6098812768981	0.196853691677167	8.17805987371701	2.88450441265217e-16	3.2568456039587e-15	yes	Bm13959	NA
WBGene00269102	935.157624228831	2.3789148477258	0.290885720291484	8.17817679514139	2.88170752493168e-16	3.2568456039587e-15	yes	Bm17960	Bma-dsc-4.2
WBGene00226996	1502.39690108538	-1.93856910328217	0.237051647299283	-8.17783434693741	2.88990681878584e-16	3.25951069087267e-15	yes	Bm6735	Bma-nol-6
WBGene00227244	231.568326232496	3.4237581598338	0.418876105227841	8.17367741225415	2.9912896123775e-16	3.37031211320977e-15	yes	Bm6983	NA
WBGene00233997	5200.12275499048	1.64358756763028	0.201102401819234	8.17288880073976	3.01091476448459e-16	3.38886047284164e-15	yes	Bm13736	Bma-tkt-1
WBGene00230767	1333.55265597519	-2.6804965528895	0.328042942907504	-8.17117578915667	3.05398254839707e-16	3.43372749276754e-15	yes	Bm10506	NA
WBGene00225177	11116.4919980069	1.67081151416852	0.204558869038749	8.16787618165812	3.13865802831585e-16	3.52523278547216e-15	yes	Bm4916a	Bma-pdr-1
WBGene00231051	2155.8703791804	1.93922027158677	0.237449696457698	8.16686776406239	3.16499497612865e-16	3.5510912219077e-15	yes	Bm10790	NA
WBGene00234149	26140.7013727735	1.84940532874061	0.226510161157156	8.16477865404664	3.22025147079124e-16	3.60930904911382e-15	yes	Bm13888	Bma-rpl-15
WBGene00229218	3573.85376243918	2.80247380095025	0.343304221210142	8.16323723335406	3.26163025542584e-16	3.65186710416802e-15	yes	Bm8957a	NA
WBGene00224405	2728.48470652233	1.93371990515946	0.236943003999021	8.16111838088897	3.31936642224615e-16	3.71263165076905e-15	yes	Bm4144a	Bma-glb-16
WBGene00268444	528.047948572014	-6.37132907147002	0.780825015768126	-8.15973994532221	3.35746673435866e-16	3.75133014167393e-15	yes	Bm17301	NA
WBGene00224913	1092.53095576788	-2.96641831967547	0.363566538486091	-8.15921710514885	3.37203064395288e-16	3.76367795312032e-15	yes	Bm4652	NA
WBGene00224080	7384.55954272274	1.73441152379997	0.212616219309047	8.15747514200186	3.42100444148004e-16	3.81436655467832e-15	yes	Bm3819	Bma-ptrn-1
WBGene00230205	324.707242715793	-4.33942489778147	0.531980984823576	-8.15710527552142	3.43149279582577e-16	3.82208371177475e-15	yes	Bm9944a	NA
WBGene00233190	5437.18363959827	1.76162194887176	0.215987792540708	8.15611812199867	3.45964106556641e-16	3.84943447741891e-15	yes	Bm12929	Bma-rps-19.1
WBGene00235077	396.963695012088	-4.53999606195087	0.556731344263988	-8.15473407187599	3.4994902534283e-16	3.88973423915811e-15	yes	Bm14742a	NA
WBGene00224126	2877.15190086464	2.12375663544326	0.260568586362029	8.15047072670745	3.62510389712545e-16	4.02518013033152e-15	yes	Bm3865a	Bma-madf-2.2
WBGene00222991	12539.7568461706	1.7354058050621	0.212927438159149	8.15022159692261	3.63258004546641e-16	4.02930591999716e-15	yes	Bm2730	NA
WBGene00226446	680.262611157683	-2.3150842142671	0.284102404130788	-8.148766714418	3.6765441525245e-16	4.07385424966908e-15	yes	Bm6185	Bma-lpr-4
WBGene00224070	933.243025865304	-2.47309238918187	0.303770306629381	-8.14132367519118	3.90979619788083e-16	4.327837423584e-15	yes	Bm3809	Bma-pole-1
WBGene00220865	4209.12447475722	2.56928873316723	0.315604519567901	8.1408489862087	3.92515719992813e-16	4.34035700693807e-15	yes	Bm604a	NA
WBGene00230361	2534.6192739383	2.84219880911035	0.349165389909735	8.13997862114887	3.95347699978001e-16	4.3671655724374e-15	yes	Bm10100	Bma-vha-6
WBGene00221969	784.689354417664	-5.1544918924349	0.633965272575791	-8.13055874731478	4.27316148693377e-16	4.71544030200776e-15	yes	Bm1708a	Bma-air-2
WBGene00224756	32253.4896695729	1.8786615588037	0.231170922491158	8.12672086332811	4.41059478577349e-16	4.86209085695092e-15	yes	Bm4495	NA
WBGene00226246	499.691807095927	-3.05177000568649	0.375576090882004	-8.12557050295641	4.45263081752392e-16	4.903385324745e-15	yes	Bm5985a	Bma-sqv-5
WBGene00229504	2358.21505225847	-2.95090708809677	0.363242935764842	-8.12378383046418	4.51870276076867e-16	4.96801406560224e-15	yes	Bm9243	NA
WBGene00226244	726.37741602628	-2.96746414725393	0.365283312109274	-8.123733137763	4.52059142693625e-16	4.96801406560224e-15	yes	Bm5983	Bma-ztf-18.1
WBGene00223142	4340.64760093654	2.56929371306996	0.31627735791592	8.12354614949386	4.52756480875987e-16	4.97057960305963e-15	yes	Bm2881	NA
WBGene00223621	1000.51143211368	-2.68716168753588	0.330930880877653	-8.12000886834532	4.66149617094467e-16	5.11237783742806e-15	yes	Bm3360	Bma-bpl-1
WBGene00231123	725.069765794727	-2.21215158099612	0.272463165036622	-8.11908494382636	4.6971168579384e-16	5.14617659844682e-15	yes	Bm10862	Bma-rpn-12.1
WBGene00234153	13338.1838823306	1.60692142914075	0.198018634497265	8.11500106149322	4.85780568769446e-16	5.31679141405987e-15	yes	Bm13892	NA
WBGene00228344	1586.52418944741	-3.2991078905992	0.406790340547676	-8.11009397656171	5.05806270005451e-16	5.53032059500858e-15	yes	Bm8083	NA
WBGene00224059	5394.22641529223	1.66094246420726	0.204864700213172	8.10750930970034	5.16679106873084e-16	5.64344202869021e-15	yes	Bm3798a	Bma-dlk-1
WBGene00232754	1377.97598835139	2.3642209237503	0.291617864397806	8.10725683295309	5.17753460235145e-16	5.64941784767778e-15	yes	Bm12493	NA
WBGene00229111	295.529867823081	-4.49890644052606	0.55498311795099	-8.10638431153748	5.21483239747201e-16	5.68432646377544e-15	yes	Bm8850	NA
WBGene00226775	739.431322944313	-2.17261013802979	0.268073116196667	-8.10454315171198	5.29440770471426e-16	5.76520107276558e-15	yes	Bm6514	NA
WBGene00225563	5698.45963104635	1.71075426320825	0.211187192121038	8.10065348199599	5.46647495619249e-16	5.94652580259925e-15	yes	Bm5302	Bma-rpap-2
WBGene00225610	7686.29702313456	1.98890133878909	0.245623049499771	8.09737255049811	5.61588889449346e-16	6.10286506130805e-15	yes	Bm5349a	Bma-rpl-28
WBGene00229332	2888.21329981732	2.07020781697902	0.255756465952325	8.09444957440457	5.75238655208211e-16	6.24486544129279e-15	yes	Bm9071	NA
WBGene00226906	10174.7406350165	1.7517572850807	0.216524986762454	8.09032394493354	5.95062542689559e-16	6.45353759607148e-15	yes	Bm6645	Bma-mac-1
WBGene00232739	421.135369538644	-2.80656984340241	0.34707207374859	-8.08641793933389	6.1445082758498e-16	6.65706836963909e-15	yes	Bm12478	NA
WBGene00232369	8691.08366676549	1.8037028562613	0.223163615594124	8.08242352347329	6.34921554230714e-16	6.87190348846676e-15	yes	Bm12108	Bma-cri-3
WBGene00230586	434.007273540543	-4.60520319849994	0.569834495492657	-8.08165043521709	6.38960419234888e-16	6.90863863986057e-15	yes	Bm10325	NA
WBGene00222803	4766.67196406043	-2.35328241904174	0.291457534536725	-8.07418625420787	6.79281221343377e-16	7.33719585352246e-15	yes	Bm2542a	NA
WBGene00222148	10234.4744839705	1.6123156448053	0.199793826102541	8.06989723485153	7.03573617201539e-16	7.59193485228046e-15	yes	Bm1887	Bma-mtrr-1
WBGene00220620	624.424995536369	2.83816061573048	0.351868753971823	8.06596375408133	7.26603666502311e-16	7.8325536082216e-15	yes	Bm359	NA
WBGene00231042	932.692261617429	2.57464387634329	0.319284457878542	8.0637933128668	7.39627684672753e-16	7.96493531785784e-15	yes	Bm10781	Bma-ttr-41
WBGene00223141	371.646397475821	3.3568929851923	0.416676828306368	8.0563466867999	7.86084802061619e-16	8.45672555631551e-15	yes	Bm2880	Bma-npr-35
WBGene00231179	2089.81373807129	2.21439826828485	0.275016041506606	8.05188765045788	8.15267294259313e-16	8.76187468203465e-15	yes	Bm10918a	NA
WBGene00223563	7075.34289018792	1.73944156715424	0.216040044564584	8.05147754278603	8.18004270178316e-16	8.78248071639345e-15	yes	Bm3302	NA
WBGene00224793	6862.68823927428	1.9641612793334	0.24417828243706	8.04396386005249	8.69781812695225e-16	9.32904116419353e-15	yes	Bm4532a	Bma-unc-24
WBGene00226260	1078.45261698548	1.96045047028234	0.243729355188626	8.0435549864936	8.72690213383757e-16	9.35087563640696e-15	yes	Bm5999a	Bma-inpp-1
WBGene00229016	328.287127984323	-3.36687094513777	0.41866193270439	-8.04198013272694	8.83982264487476e-16	9.46240755642688e-15	yes	Bm8755a	Bma-ima-2
WBGene00228442	3348.53577832599	2.10706334975042	0.262013900673118	8.0417998599973	8.85284006479733e-16	9.46688436070892e-15	yes	Bm8181	Bma-yap-1
WBGene00225572	80243.6225233718	1.81845511774912	0.226218034498184	8.03850639840881	9.09401122625853e-16	9.7150877656391e-15	yes	Bm5311	NA
WBGene00229883	357.099453133727	-3.29697953236996	0.410436862614276	-8.03285433810662	9.52307063725306e-16	1.01633169201361e-14	yes	Bm9622	NA
WBGene00222395	5436.62067397776	2.3390190909181	0.291259153862523	8.03071443386168	9.69066777734901e-16	1.0331891068089e-14	yes	Bm2134a	NA
WBGene00222727	709.457558902964	-3.20161383080772	0.398733847721675	-8.02945084572434	9.79099290209004e-16	1.04284780264309e-14	yes	Bm2466a	Bma-let-653
WBGene00222333	411.58775125605	-9.68166660826552	1.20592710787118	-8.02840117372974	9.87511121906731e-16	1.05076282733174e-14	yes	Bm2072a	Bma-cyk-7
WBGene00225133	362.719199655105	3.10267773688824	0.386562675893053	8.02632517410097	1.00435790050933e-15	1.06762846269419e-14	yes	Bm4872	NA
WBGene00268224	3347.32844542055	1.80872737767139	0.225586280041845	8.01789620067267	1.07571648354178e-15	1.1423490704807e-14	yes	Bm17080	Bma-zhit-1
WBGene00229549	658.215612694025	-5.36311527434763	0.669235429392271	-8.01379460620883	1.11222393561356e-15	1.17994846238607e-14	yes	Bm9288	NA
WBGene00234335	2558.01316909311	2.13487356547794	0.266409468376802	8.01350484457421	1.11484871712604e-15	1.18156320514397e-14	yes	Bm14074	NA
WBGene00223470	221.456985503821	-3.53130828341799	0.441072796572611	-8.00618018353951	1.18326320080076e-15	1.25159577458837e-14	yes	Bm3209a	Bma-inx-2
WBGene00226754	322.553516586953	-3.67064278424772	0.458470164361933	-8.00628496590671	1.1822559392852e-15	1.25159577458837e-14	yes	Bm6493	Bma-nsun-4
WBGene00225755	9430.62817540721	1.5748411670651	0.19675165436775	8.0042080059035	1.20237999736286e-15	1.27056229504369e-14	yes	Bm5494	Bma-tftc-5
WBGene00224416	769.107383980875	-4.57904174365863	0.572116944410193	-8.00368139485759	1.20753582333155e-15	1.27475333467957e-14	yes	Bm4155	NA
WBGene00220280	5134.52125649161	1.67788296818406	0.209838624914323	7.9960634934066	1.28460155670099e-15	1.35477418110739e-14	yes	Bm19a	NA
WBGene00224635	398.440382372986	-3.05840891042503	0.38257266841994	-7.99432150513139	1.30289364431872e-15	1.37271439516962e-14	yes	Bm4374a	Bma-pst-2
WBGene00223328	45657.0799409755	1.58206774909977	0.197935106601147	7.9928607727367	1.31842993988731e-15	1.38771874321144e-14	yes	Bm3067a	Bma-nap-1
WBGene00228355	31087.9403286185	1.9144715671148	0.239547907979036	7.9920195641297	1.32745965998356e-15	1.3958518406991e-14	yes	Bm8094a	NA
WBGene00232525	344.450107385699	-3.32014204169416	0.415503025788571	-7.99065671156777	1.34221827919659e-15	1.40998714329328e-14	yes	Bm12264	Bma-wrt-10
WBGene00233578	13525.9043852355	1.7169413673099	0.214953104389661	7.98751603139203	1.37684756486e-15	1.44494825244612e-14	yes	Bm13317	Bma-ipgm-1
WBGene00221975	11748.6840905456	2.39204063809244	0.299714732889169	7.981057904741	1.4508437969742e-15	1.52111460710162e-14	yes	Bm1714a	NA
WBGene00233046	630.08794713975	-4.18141957298539	0.523981861781677	-7.98008457538484	1.46233056882514e-15	1.53165904642828e-14	yes	Bm12785	NA
WBGene00222482	3051.91560883076	1.68415092660929	0.211062165601167	7.97940702357683	1.47037954958088e-15	1.53858563220304e-14	yes	Bm2221	Bma-eif-2Bgamma
WBGene00224419	653.922458186518	-2.31786030983842	0.290603523848758	-7.97602272381505	1.5112413092574e-15	1.57980006133591e-14	yes	Bm4158a	Bma-trpp-8
WBGene00222961	1461.78245124426	1.88060523047379	0.235875196967909	7.97288250162925	1.55015542590053e-15	1.61890013533374e-14	yes	Bm2700	NA
WBGene00223744	2286.60473906935	2.73730169744191	0.343448563251939	7.97004847399506	1.58612141891006e-15	1.65484819898942e-14	yes	Bm3483	NA
WBGene00225415	17320.6399375894	1.84273825733818	0.231274532015012	7.96775261540069	1.61585918169884e-15	1.68423454590496e-14	yes	Bm5154	Bma-nduo-4
WBGene00224135	663.901311802627	-3.12623788929412	0.39244983938932	-7.9659553286065	1.63952165849582e-15	1.70723756761737e-14	yes	Bm3874	Bma-fcp-1
WBGene00224975	2729.07042554962	1.92729543044207	0.242131702155394	7.9596988468911	1.72458508821399e-15	1.79407079807892e-14	yes	Bm4714	NA
WBGene00226560	4204.13706411857	1.780983299853	0.223844256532811	7.95635022063631	1.77188399167408e-15	1.84148758203567e-14	yes	Bm6299a	NA
WBGene00224463	815.710904837578	2.22940883729508	0.280354496022706	7.95210659690839	1.83366367325081e-15	1.90384750570566e-14	yes	Bm4202	Bma-hlh-13
WBGene00223059	1370.73422921984	2.57086915701955	0.323548816115837	7.94584628026927	1.92869476727107e-15	2.00057738928456e-14	yes	Bm2798a	NA
WBGene00225788	10001.0422464843	2.03008959953704	0.255597447894886	7.94252687676252	1.98103411631435e-15	2.05288013117101e-14	yes	Bm5527	Bma-nifk-1
WBGene00226784	6450.66558993269	1.75079397111087	0.220471255126234	7.94114393782729	2.00325041219594e-15	2.07389644122507e-14	yes	Bm6523a	NA
WBGene00220676	2945.44912102876	2.82305846397676	0.355731142426749	7.93593286412384	2.08919004994583e-15	2.16077909123258e-14	yes	Bm415a	NA
WBGene00230842	328.579327452056	2.89290155292073	0.364764106298788	7.9308832831021	2.17592650679397e-15	2.24831750436812e-14	yes	Bm10581a	NA
WBGene00226594	875.211655016631	3.47579929580226	0.438383322394331	7.928675928679	2.21494711847043e-15	2.28643144262146e-14	yes	Bm6333	NA
WBGene00224030	1030.80835556995	2.44850141980913	0.308957116083906	7.92505267670924	2.28049638271728e-15	2.35183048516031e-14	yes	Bm3769	NA
WBGene00222319	420.727024376386	-3.1455232744723	0.397171431583087	-7.91981251505061	2.37868977643496e-15	2.45073663024045e-14	yes	Bm2058	Bma-cgh-1
WBGene00255599	250.404895437792	-5.03013687822609	0.635243755822743	-7.9184357691344	2.40517134618897e-15	2.47326400906093e-14	yes	Bm16945	NA
WBGene00226678	3456.52533296271	1.80189918169856	0.227555543092884	7.91850269700114	2.40387730800919e-15	2.47326400906093e-14	yes	Bm6417a	Bma-prdx-6
WBGene00225653	1076.50270789414	-3.42828988591733	0.433366227330151	-7.91083769272487	2.55662673719558e-15	2.62596775750896e-14	yes	Bm5392a	Bma-daf-16
WBGene00226794	13127.0912242741	1.63955736834058	0.207257064120914	7.91074299587714	2.55857241142264e-15	2.62596775750896e-14	yes	Bm6533	Bma-rps-4
WBGene00230222	2275.01860616226	1.84290735994297	0.232996528243454	7.90959150265686	2.58234837271997e-15	2.64783376207603e-14	yes	Bm9961a	Bma-row-1
WBGene00230797	493.065074070881	3.60880027653953	0.456346891481865	7.90801985047146	2.61515121529526e-15	2.67890490171021e-14	yes	Bm10536a	NA
WBGene00226925	2662.12013999219	-2.61586055240368	0.330989994760365	-7.90314086169752	2.7196195110494e-15	2.78325912711503e-14	yes	Bm6664a	Bma-atm-1
WBGene00223514	629.227451312954	-4.88425444396228	0.618050745945164	-7.90267542917201	2.72979741281063e-15	2.79100947311697e-14	yes	Bm3253	Bma-pch-2
WBGene00226772	3558.02350006437	1.83266820999297	0.232024531663406	7.89859674257028	2.82060813459464e-15	2.88110735578471e-14	yes	Bm6511a	NA
WBGene00222914	356.378208682328	-4.74191778522985	0.601092105578337	-7.88883723679492	3.05015016595363e-15	3.11260562173268e-14	yes	Bm2653a	Bma-nex-4
WBGene00227443	399.318002754726	-3.49066147113655	0.442834864890417	-7.88253533741149	3.20804248130244e-15	3.27061609773127e-14	yes	Bm7182	Bma-src-1
WBGene00225287	1813.94272709131	-1.95461449235165	0.248010315046001	-7.88118224836376	3.24297893671231e-15	3.3030911888662e-14	yes	Bm5026	Bma-dcr-1
WBGene00224408	3362.63784615634	1.98815098634454	0.252369929917057	7.87792343960294	3.32866560749804e-15	3.38714643725941e-14	yes	Bm4147	Bma-mdh-1
WBGene00269251	2207.08462738059	1.78922495535024	0.227221791783149	7.87435457360447	3.42506332314529e-15	3.481931072818e-14	yes	Bm18111	Bma-cyp-43A1
WBGene00227352	736.332371243583	-2.18267091389203	0.277199733728092	-7.8740007594417	3.43476855329482e-15	3.48848768232739e-14	yes	Bm7091	NA
WBGene00226301	1714.02727789831	2.88317109084111	0.366359682022246	7.86978270896642	3.55257742140171e-15	3.60472226044691e-14	yes	Bm6040	NA
WBGene00226991	10622.6449868318	1.67825401104886	0.213287636451975	7.8685011422439	3.58915279715141e-15	3.63838904649738e-14	yes	Bm6730	Bma-alkb-1
WBGene00227855	30433.3832249346	1.63552725358164	0.208045643469373	7.86138669528262	3.79903983321082e-15	3.8475152942206e-14	yes	Bm7594a	Bma-puf-12
WBGene00269324	2572.01666523508	2.3900928581463	0.30407493892589	7.86020994228932	3.83490162347094e-15	3.88016722337027e-14	yes	Bm18184a	NA
WBGene00227887	15951.6410684324	1.82463405604537	0.232163416389794	7.85926604810927	3.86390770179117e-15	3.90582745515966e-14	yes	Bm7626	NA
WBGene00227295	9456.51200295674	1.79218989175227	0.22821084521489	7.85321964021777	4.05490629853934e-15	4.09503496596126e-14	yes	Bm7034a	Bma-rpl-1
WBGene00223179	3062.85956626844	2.0028780499384	0.255110587485744	7.85101892351028	4.12670682135508e-15	4.16362180704517e-14	yes	Bm2918	NA
WBGene00223439	483.664226563998	-2.83635586456916	0.361507564905618	-7.84591012724636	4.298246919924e-15	4.33261672125923e-14	yes	Bm3178a	Bma-gcy-12
WBGene00223975	371.809166219854	-3.43023266063594	0.437242167044912	-7.84515520042146	4.32418366353097e-15	4.35466428145999e-14	yes	Bm3714a	NA
WBGene00227881	1664.04159568293	1.83477663018563	0.233961320665129	7.84222206033693	4.42642689770496e-15	4.45344264872382e-14	yes	Bm7620	Bma-obr-3
WBGene00223857	617.496529714468	-2.6073602083601	0.3325656483055	-7.84013689220522	4.50055522181105e-15	4.52377572248643e-14	yes	Bm3596a	Bma-frm-10
WBGene00222277	11110.4582997647	1.8823701064618	0.240187180357179	7.83709648309519	4.61083765144616e-15	4.63028354594617e-14	yes	Bm2016a	NA
WBGene00225187	479.827926001019	-3.46414675047465	0.442168447630791	-7.83445035265656	4.70898093584743e-15	4.72441298947614e-14	yes	Bm4926	Bma-gtbp-1
WBGene00226104	4400.28014225903	2.18139877459093	0.278454888844857	7.83393957865221	4.72816063282504e-15	4.73921807116186e-14	yes	Bm5843	NA
WBGene00234331	309.832311019171	-3.38410405452793	0.432018369196232	-7.83324112079781	4.75451244237494e-15	4.76117764673341e-14	yes	Bm14070	Bma-sec-61.B
WBGene00223517	2046.44594290707	1.90155822018419	0.24277633362471	7.83255184635776	4.78065950365914e-15	4.78289137084105e-14	yes	Bm3256a	Bma-ifb-1
WBGene00229779	1035.39362241201	2.35180292607191	0.30027917673245	7.83205466214323	4.79960760743539e-15	4.79736898448416e-14	yes	Bm9518	NA
WBGene00230668	643.277564096028	2.76024129145976	0.352649217278472	7.82715842321043	4.99020118901718e-15	4.98322513889274e-14	yes	Bm10407a	NA
WBGene00229599	4377.81909868765	2.17180791340964	0.277475790613195	7.82701766020793	4.99578937011669e-15	4.98416043769091e-14	yes	Bm9338	NA
WBGene00226032	7410.53962766237	-8.92428309359136	1.14064566221924	-7.82388728523131	5.12166687292497e-15	5.10499167845498e-14	yes	Bm5771	Bma-cav-1
WBGene00225790	5042.46654240536	1.68747954169814	0.215696419655876	7.82340079816978	5.14150761725304e-15	5.12000502963442e-14	yes	Bm5529	NA
WBGene00230319	38634.9224558625	2.020602084777	0.258299310487802	7.82271575158704	5.16957469823473e-15	5.14317482744523e-14	yes	Bm10058a	Bma-pqn-35
WBGene00222918	1721.89579253275	1.990928053692	0.254683222030051	7.81727213054139	5.39803241935917e-15	5.36548398640385e-14	yes	Bm2657	NA
WBGene00225092	3160.46581864891	2.44543483884439	0.312852169501809	7.81658264585008	5.4276686775938e-15	5.38994160152156e-14	yes	Bm4831a	Bma-cah-3
WBGene00225569	33601.39156422	1.8447496834616	0.236020852351569	7.81604534125537	5.45087473668825e-15	5.40797433366801e-14	yes	Bm5308a	NA
WBGene00224358	4576.06283127795	1.86051081923137	0.238049542034461	7.81564544645096	5.46820946795901e-15	5.42015397309721e-14	yes	Bm4097	NA
WBGene00224103	2546.81971281269	1.7521226336562	0.224351362038779	7.80972585917864	5.73125072060016e-15	5.67563322284942e-14	yes	Bm3842a	Bma-marb-1
WBGene00222070	531.965432285688	2.34509416255417	0.300507417829044	7.80378128265798	6.0079280472273e-15	5.94119679945276e-14	yes	Bm1809a	NA
WBGene00226848	329.567300118328	-2.97467758950266	0.381186774675613	-7.80372716769644	6.01050614149024e-15	5.94119679945276e-14	yes	Bm6587	NA
WBGene00227960	188.665502698873	-7.13646853111429	0.915119811837389	-7.79839802264317	6.26979893150462e-15	6.19178760839373e-14	yes	Bm7699	Bma-ces-2
WBGene00224307	962.28343523098	2.59635046290076	0.333462392014998	7.78603682175943	6.91438067462085e-15	6.8220615956319e-14	yes	Bm4046a	NA
WBGene00233068	398.812194653938	-3.65307152308849	0.46944102178392	-7.78174755415807	7.15294951807047e-15	7.050952537822e-14	yes	Bm12807	NA
WBGene00227006	1027.75449357776	2.38960339938628	0.307165234016707	7.77953731331557	7.27902746075728e-15	7.16863779797925e-14	yes	Bm6745a	NA
WBGene00234057	7216.26304504147	1.56666953231873	0.20140721096667	7.77861688665155	7.33217378414483e-15	7.21434730001027e-14	yes	Bm13796	NA
WBGene00227424	2890.14249676576	-2.95464032053553	0.379864826344545	-7.77813610427728	7.36008628386536e-15	7.23516738822177e-14	yes	Bm7163	NA
WBGene00220532	625.750779112888	-3.92459761401895	0.504590081849244	-7.7777938076704	7.38002250547004e-15	7.24811559542727e-14	yes	Bm271	NA
WBGene00222722	1128.97888984426	-1.90254440922367	0.244754967479638	-7.77326167805748	7.6490495821308e-15	7.50545478686186e-14	yes	Bm2461a	Bma-nrx-1
WBGene00233981	6587.94556329554	1.80628404018558	0.2325241922272	7.7681553170203	7.96373746739228e-15	7.80708572398063e-14	yes	Bm13720	Bma-rpl-43
WBGene00230109	353.959188772671	-4.44661577957727	0.572919084119672	-7.76133297498684	8.40413465500343e-15	8.23128910679724e-14	yes	Bm9848	NA
WBGene00234986	10108.03976678	-8.83119111280613	1.13797822165096	-7.7604218998093	8.46473180901894e-15	8.2830686149441e-14	yes	Bm14801	NA
WBGene00224158	4923.07744672641	1.94923994627523	0.251204151232776	7.75958493006347	8.52077893743732e-15	8.33030532067891e-14	yes	Bm3897	Bma-exos-9
WBGene00225465	460.267585989881	2.84278893249203	0.366592439221664	7.75463056065134	8.86010285832631e-15	8.65414786936795e-14	yes	Bm5204a	NA
WBGene00229618	247.797629729187	-4.1712606287223	0.538006384821203	-7.75318053169302	8.96190673044227e-15	8.74561298876949e-14	yes	Bm9357	Bma-bed-2
WBGene00225149	574.102543592538	-2.81082422201988	0.362586804174531	-7.75214152765166	9.03556038645571e-15	8.80946583629418e-14	yes	Bm4888	Bma-mks-6
WBGene00227903	14013.7919731622	1.49538448330419	0.193033145087352	7.74677572925361	9.42552131461389e-15	9.18131462600798e-14	yes	Bm7642	NA
WBGene00227907	5382.25681622104	1.67207205026314	0.216015111202858	7.7405327847315	9.90010696944793e-15	9.63484524774156e-14	yes	Bm7646a	NA
WBGene00226673	58671.5891902292	1.74413864234135	0.225415603204091	7.73743528642161	1.01442285599292e-14	9.86346724316162e-14	yes	Bm6412a	Bma-crt-1
WBGene00234152	2539.02320180657	1.72595121884606	0.223139251391097	7.7348615632889	1.03515682781808e-14	1.00559432548238e-13	yes	Bm13891	Bma-sel-9
WBGene00228361	6516.4597660243	1.78553270470682	0.230880353404067	7.73358442319225	1.04559975130515e-14	1.01481896152488e-13	yes	Bm8100	NA
WBGene00233979	10174.1494841245	1.90015994717013	0.245804613503421	7.73036730306807	1.07236719905734e-14	1.03985651926691e-13	yes	Bm13718	NA
WBGene00226048	308.789408292868	3.08825166612828	0.399571714456717	7.72890461059603	1.08475916147063e-14	1.05092173735604e-13	yes	Bm5787	Bma-frpr-17
WBGene00223850	6128.68551724748	1.61444526333641	0.20895562994016	7.72625874592968	1.10753398504832e-14	1.07201686086656e-13	yes	Bm3589a	Bma-lim-9
WBGene00225227	799.847663459418	-2.11422917550513	0.273770916940289	-7.72262152289265	1.13961181324969e-14	1.10207044936556e-13	yes	Bm4966a	Bma-lin-23
WBGene00233949	16353.9939684156	1.85158031090793	0.239781235393197	7.72195667384767	1.1455733679669e-14	1.10683666706631e-13	yes	Bm13688	Bma-rack-1
WBGene00234321	3065.70388285087	2.15449985239915	0.279089870941672	7.71973502703518	1.16571785003535e-14	1.12528529397556e-13	yes	Bm14060	Bma-rps-19.2
WBGene00230033	8906.95597841673	1.64636367678099	0.213427275217478	7.71393288464831	1.21998646956775e-14	1.17661161308897e-13	yes	Bm9772a	NA
WBGene00224316	320.329984549032	-3.45293021723196	0.447727534843226	-7.71212388900991	1.23740920995891e-14	1.19234169826526e-13	yes	Bm4055	Bma-rab-33
WBGene00222677	909.561877115513	-2.21332111934042	0.287176209401052	-7.70718829375396	1.286199632065e-14	1.23824160445431e-13	yes	Bm2416	Bma-smc-5
WBGene00230748	5965.35381823329	1.5590076692087	0.202334311339814	7.70510774413536	1.30732942291238e-14	1.25745374923754e-13	yes	Bm10487a	NA
WBGene00268238	684.140724854765	-4.955535058247	0.643431656917694	-7.70172714532897	1.3423929130663e-14	1.29002153035923e-13	yes	Bm17094a	NA
WBGene00223985	44532.6244284383	1.61523109598607	0.209726541582578	7.70160554690733	1.34367121993349e-14	1.29009293204188e-13	yes	Bm3724a	Bma-fkb-6
WBGene00224252	1137.38310303245	2.15869858376436	0.280317732909462	7.70089912385808	1.35112123752772e-14	1.29608451746728e-13	yes	Bm3991a	NA
WBGene00269145	586.476170382704	3.80594563995174	0.494303709181009	7.69960971212952	1.36482446006138e-14	1.30805850532717e-13	yes	Bm18003	Bma-flp-18
WBGene00234157	6237.21991087391	2.23469309704968	0.290334706964678	7.69695473342617	1.3934723303247e-14	1.33432136009197e-13	yes	Bm13896	Bma-rps-11
WBGene00222969	11142.8052399904	1.7991359233772	0.234035108995082	7.68746164241114	1.50082820353483e-14	1.43583698222104e-13	yes	Bm2708	Bma-rpl-34
WBGene00222674	208.99446715664	-3.52601443773526	0.458730066210668	-7.68646900967675	1.51251301501401e-14	1.44572497376228e-13	yes	Bm2413a	Bma-syg-2
WBGene00231056	4397.01561915044	1.62557044565191	0.211497810690434	7.68599183294257	1.51816192786416e-14	1.4498311102553e-13	yes	Bm10795	Bma-vps-33.1
WBGene00225956	1838.2212073723	1.86361139341153	0.242506308185748	7.68479553110879	1.53241539779446e-14	1.46213989201849e-13	yes	Bm5695	Bma-chn-1
WBGene00224584	14284.0286176606	1.53799132911525	0.200186467724684	7.68279368029232	1.55656171882434e-14	1.48253856152914e-13	yes	Bm4323	Bma-rpl-7
WBGene00225721	5020.79387434351	1.75420485308654	0.228326110782018	7.68289201387606	1.55536692552234e-14	1.48253856152914e-13	yes	Bm5460a	NA
WBGene00229328	436.22954764369	-2.41893563023986	0.314858466481943	-7.6826126267708	1.55876395560747e-14	1.48331756521617e-13	yes	Bm9067	NA
WBGene00224674	889.910410910285	-2.50494307220206	0.326106248770728	-7.68137096926095	1.57394962032326e-14	1.49643923529403e-13	yes	Bm4413a	Bma-capg-2
WBGene00223645	546.25561368169	-2.52356899098314	0.328590980968739	-7.67997034959162	1.59125415452741e-14	1.51155037817032e-13	yes	Bm3384	Bma-fmi-1
WBGene00224827	7663.77401358617	1.93844387802331	0.252485321600676	7.67745176525194	1.62284320292771e-14	1.54019175548011e-13	yes	Bm4566a	Bma-ccz-1
WBGene00225565	13735.3382935622	1.71519519888292	0.223430762123536	7.67662958574422	1.63328825401368e-14	1.54873306564218e-13	yes	Bm5304	NA
WBGene00226067	5208.5454152113	2.17799634611622	0.283928804911294	7.6709242191777	1.70761417203804e-14	1.61777947421641e-13	yes	Bm5806a	Bma-dnj-20
WBGene00230757	234.855590803424	-6.54583336905187	0.853358777964837	-7.67066975588267	1.71100555643985e-14	1.61956047148878e-13	yes	Bm10496	NA
WBGene00220491	1610.07977040108	2.28893266296639	0.298524464280932	7.66748771655895	1.7539781390016e-14	1.65877102907345e-13	yes	Bm230	NA
WBGene00231014	137.236394061352	4.10783320174196	0.535810421276135	7.66657951884991	1.7664366811601e-14	1.66908016213673e-13	yes	Bm10753	NA
WBGene00229483	410.095878145022	3.23162633944117	0.421578594881817	7.66553705210557	1.78084444938471e-14	1.68121130177597e-13	yes	Bm9222	NA
WBGene00222112	354.838171529582	-2.68896403876375	0.35083124298587	-7.66455124087126	1.79457551756e-14	1.69268280551544e-13	yes	Bm1851	Bma-tsp-11
WBGene00231470	884.956091864776	-3.12532817678993	0.407835657728285	-7.66320481685822	1.81349785857759e-14	1.70902634605619e-13	yes	Bm11209	Bma-rpoa-2
WBGene00229007	482.933512477508	-3.9507756789475	0.515699181718612	-7.66100823697489	1.84479024704969e-14	1.73698835651472e-13	yes	Bm8746	NA
WBGene00227591	8001.70132471199	1.73658212509595	0.226693680204441	7.66047877263201	1.85241207052706e-14	1.74263347986808e-13	yes	Bm7330	Bma-mrpl-45
WBGene00225304	374.296301872397	-4.97243459138426	0.64912947119607	-7.6601584306782	1.85703853705764e-14	1.7454533267169e-13	yes	Bm5043	Bma-dpy-1
WBGene00227901	414.03406304858	2.69319903513646	0.351639774431165	7.65897156967851	1.87427879702858e-14	1.76011369940064e-13	yes	Bm7640a	Bma-dve-1
WBGene00226367	1774.5909250535	1.79696701693949	0.234750960073799	7.65478026745692	1.93643056051549e-14	1.81688734290048e-13	yes	Bm6106	Bma-pqn-73
WBGene00229130	352.471985236518	-3.32025153403043	0.433842204125549	-7.65313172037452	1.96142815589235e-14	1.83873164395333e-13	yes	Bm8869	NA
WBGene00224555	1738.38546984431	1.84454828166488	0.241089766048023	7.65087756274755	1.99612334248121e-14	1.86962077051452e-13	yes	Bm4294	Bma-tsp-15
WBGene00227362	2857.87022867404	2.03987436498509	0.266799119668645	7.64573124348591	2.07761209693666e-14	1.94424573088876e-13	yes	Bm7101	NA
WBGene00233947	1892.73801554957	1.73551323448493	0.227108242890849	7.64178883334957	2.14224319071178e-14	2.00297869009396e-13	yes	Bm13686	NA
WBGene00223152	2569.01434117859	1.66841980112865	0.218444496779784	7.63772869412499	2.21087112328599e-14	2.06534298919001e-13	yes	Bm2891a	Bma-cka-2
WBGene00226759	6820.10885370754	1.59014791524612	0.208356236784712	7.63187097148989	2.31370949113884e-14	2.15952937260911e-13	yes	Bm6498	NA
WBGene00222667	540.423534920325	-3.1640275906655	0.414668019467605	-7.63026672451814	2.34268510790382e-14	2.18467109932023e-13	yes	Bm2406a	Bma-ula-1
WBGene00234155	1904.44146311372	2.00524888380087	0.262895126612941	7.62756202306171	2.39234718780138e-14	2.22904348846015e-13	yes	Bm13894	Bma-rpl-24.2
WBGene00220870	301.164142746221	-2.75646083751501	0.361554247215682	-7.62392050084443	2.46084956277288e-14	2.29087776412784e-13	yes	Bm609a	NA
WBGene00227005	1362.78252463481	2.07385486493076	0.272126252595129	7.62092905463352	2.51856348594108e-14	2.34257011734885e-13	yes	Bm6744a	Bma-rga-2
WBGene00227262	3151.7158299552	1.72067518800756	0.225963374307079	7.61484109220813	2.64016081146578e-14	2.4535405979927e-13	yes	Bm7001	NA
WBGene00222144	3373.08407457035	1.70783504008333	0.224354678434042	7.61221050527554	2.69447230217572e-14	2.50184321644826e-13	yes	Bm1883a	NA
WBGene00231307	458.398030954996	-2.55231948266899	0.335632937628596	-7.60449644990841	2.86015321230134e-14	2.65338023115228e-13	yes	Bm11046a	NA
WBGene00233247	410.771642212067	-2.4916405508268	0.327658940306209	-7.60437224297395	2.86290123832152e-14	2.65363207340961e-13	yes	Bm12986	Bma-oxa-1.2
WBGene00228350	2384.95524705928	3.46972248467326	0.456874252581765	7.59448024279351	3.09030294317532e-14	2.86193569888708e-13	yes	Bm8089	Bma-ifa-1
WBGene00230057	219.90094605008	-3.73674208708139	0.49220711764365	-7.59180831226162	3.1547148206913e-14	2.91906470671047e-13	yes	Bm9796	NA
WBGene00223087	4535.07204762824	1.80489502106963	0.237787118030558	7.5903818340474	3.18964150619775e-14	2.9462938568025e-13	yes	Bm2826a	Bma-pitr-1
WBGene00222160	320.738488393623	-5.18273615245245	0.682801280486302	-7.59040192303276	3.18914700617941e-14	2.9462938568025e-13	yes	Bm1899	NA
WBGene00222820	232.501085675197	-3.85086489170787	0.507435135378445	-7.58888106720457	3.22679763340199e-14	2.97804794503896e-13	yes	Bm2559	NA
WBGene00231641	10879.9500067203	1.59821103496061	0.210679615949586	7.58597849040627	3.29987168822926e-14	3.04286791216666e-13	yes	Bm11380	Bma-pro-2
WBGene00234610	343.816964411208	2.98125972949385	0.393241050021239	7.58125259133764	3.42234559770076e-14	3.15308968868131e-13	yes	Bm14349	NA
WBGene00222325	5724.48901730344	1.56237070976371	0.206156767738627	7.57855648835425	3.49420762709653e-14	3.21653219281266e-13	yes	Bm2064	Bma-hda-2
WBGene00225108	4137.91286461152	1.54292205158023	0.203695107397814	7.57466426803725	3.60057542843288e-14	3.31160220735264e-13	yes	Bm4847	NA
WBGene00235061	6972.17679118989	2.02466684547511	0.267309629460021	7.57423834511701	3.61240671220003e-14	3.31963447008777e-13	yes	Bm14726	Bma-rpl-36
WBGene00226328	3143.27697802816	1.76928270574674	0.233672144089566	7.57164578876196	3.68525174557201e-14	3.38367373211688e-13	yes	Bm6067a	NA
WBGene00228488	1321.1245144764	2.6185014754123	0.34595506043046	7.56890641274098	3.76379171027145e-14	3.45282775475673e-13	yes	Bm8227	NA
WBGene00229184	924.989799593848	-1.99449789445467	0.263580313341158	-7.56694560823724	3.82101790619059e-14	3.50232736226109e-13	yes	Bm8923	Bma-hda-3
WBGene00227537	605.531250018009	2.51958819795753	0.333014509736849	7.56600125306413	3.84888339631828e-14	3.52485346936328e-13	yes	Bm7276	Bma-unc-63.2
WBGene00229213	197.810406942565	-8.92453423106859	1.1795758453665	-7.5658841829672	3.85235172548803e-14	3.52501697169977e-13	yes	Bm8952	NA
WBGene00223080	1610.54242583708	1.82488508652035	0.241224596509177	7.56508711353953	3.87604761034273e-14	3.54367322054798e-13	yes	Bm2819	Bma-mam-2
WBGene00224249	944.26491058001	2.42237273148064	0.320247569124995	7.5640628220824	3.90670906439857e-14	3.56866049659256e-13	yes	Bm3988	Bma-unc-6
WBGene00223944	621.52856264237	2.13771268739288	0.282624876822803	7.56378104937009	3.91518548356576e-14	3.57335710872293e-13	yes	Bm3683a	NA
WBGene00233055	3275.92197766008	1.9229843130495	0.254369392936143	7.55981012830522	4.03658157357409e-14	3.68101885624225e-13	yes	Bm12794a	NA
WBGene00228148	950.112523987093	-2.05805160205795	0.272282194072658	-7.55852437970571	4.07667611278469e-14	3.7144204548034e-13	yes	Bm7887	NA
WBGene00228060	9925.71708459667	1.4550372128995	0.192858809209647	7.54457221250293	4.53774540679116e-14	4.13100612011616e-13	yes	Bm7799	NA
WBGene00223907	615.081168751994	-3.96474337441132	0.525927904733676	-7.53856819295228	4.75159490360199e-14	4.32201522853101e-13	yes	Bm3646a	NA
WBGene00231352	2016.27187333223	2.71537655579187	0.360240833282783	7.53767009432922	4.78442370829996e-14	4.34818490538033e-13	yes	Bm11091	NA
WBGene00255616	141.79171356871	3.73987587137452	0.49617590042581	7.53739927345327	4.79436689848546e-14	4.35352892519252e-13	yes	NA	NA
WBGene00225600	12822.9819071954	1.59718066732333	0.211911456294152	7.53701897601188	4.80836382818891e-14	4.36254177976665e-13	yes	Bm5339	Bma-apb-3
WBGene00226822	720.282790639999	-4.72853415783932	0.627407917404933	-7.53661856451756	4.82314448286524e-14	4.37224984212361e-13	yes	Bm6561a	NA
WBGene00228991	247.999155437092	-3.23590845530129	0.429448515836517	-7.53503234025178	4.88213812574102e-14	4.42198732183559e-13	yes	Bm8730	NA
WBGene00223355	809.217652272054	2.07052493634951	0.274886484953692	7.53229078067738	4.98577737406301e-14	4.51204430431462e-13	yes	Bm3094a	NA
WBGene00231932	790.954374186874	2.41845145036268	0.321176969834484	7.52996533845192	5.0753793886775e-14	4.58925655271556e-13	yes	Bm11671	NA
WBGene00230075	1333.10483896926	2.520814442954	0.33499105346234	7.5250201965092	5.27121755818057e-14	4.76231839257208e-13	yes	Bm9814	NA
WBGene00224390	525.540465721526	-3.8729080272891	0.514748349156456	-7.52388625167196	5.31716082604259e-14	4.79977912814207e-13	yes	Bm4129	Bma-mgl-2
WBGene00227744	1247.14952699767	-2.37766726019658	0.316176317805056	-7.52006752657095	5.47479581810019e-14	4.93376258965042e-13	yes	Bm7483	Bma-eat-4
WBGene00230600	630.82999594732	-3.93420530405662	0.52315426817671	-7.52016287235515	5.47080463181272e-14	4.93376258965042e-13	yes	Bm10339	NA
WBGene00225744	2109.35981918947	1.68967358175928	0.224940971553242	7.5116310296515	5.83951820432444e-14	5.25801996296944e-13	yes	Bm5483a	NA
WBGene00269226	718.445767994024	-2.76609925910088	0.368279019167825	-7.51087929296446	5.87315279556056e-14	5.28386500457023e-13	yes	Bm18086	NA
WBGene00222672	385.018109649684	2.56220980185103	0.341357760222062	7.50593688036929	6.09908023981905e-14	5.48252053436754e-13	yes	Bm2411	Bma-grl-10
WBGene00230144	196.292815483231	-6.00658344483544	0.80082341683757	-7.50050924903679	6.3570371266968e-14	5.70961046207513e-13	yes	Bm9883	NA
WBGene00226882	555.030614542341	-3.32742307446449	0.444042375551742	-7.49348093260248	6.70705809720446e-14	6.01893865255827e-13	yes	Bm6621	NA
WBGene00227379	35056.1231400803	2.01501594985272	0.268974726307452	7.49146946821113	6.81067287265156e-14	6.10680835401351e-13	yes	Bm7118a	Bma-ccg-1
WBGene00228559	2427.21955082912	2.90217090814498	0.387660825982319	7.48636620889145	7.08066530859429e-14	6.34189209938177e-13	yes	Bm8298	NA
WBGene00226710	3507.41103722597	1.78185409675668	0.238015587928618	7.48629160074619	7.08468954079326e-14	6.34189209938177e-13	yes	Bm6449a	NA
WBGene00234102	1191.88879812182	1.87190566789223	0.250083845091307	7.48511231186802	7.14859775240005e-14	6.3937583403144e-13	yes	Bm13841	Bma-sec-61.A
WBGene00224175	318.607534187751	-5.37677629884785	0.718359592408132	-7.48479780275986	7.16573718533908e-14	6.39996659873959e-13	yes	Bm3914	Bma-mom-2
WBGene00220576	5191.20394077624	1.75352838753704	0.234283085299265	7.48465637328085	7.17345766223634e-14	6.39996659873959e-13	yes	Bm315	NA
WBGene00268637	692.932436090261	-3.51666620568293	0.469844685377056	-7.4847419054251	7.16878758156805e-14	6.39996659873959e-13	yes	Bm17494	NA
WBGene00227582	6462.47441010896	1.47621164796816	0.197245308393492	7.48414073820814	7.20167491810414e-14	6.41979590245307e-13	yes	Bm7321	Bma-itsn-1
WBGene00223991	717.155275812407	-3.25155862947749	0.434564282659768	-7.48234210500733	7.3009588078206e-14	6.50289057571054e-13	yes	Bm3730a	NA
WBGene00227069	1693.27458518839	-1.91131920266375	0.255503372378116	-7.48060264283014	7.39825583258555e-14	6.58407900715566e-13	yes	Bm6808a	Bma-smg-6
WBGene00226365	779.042712901101	-3.36774054823439	0.450295043049175	-7.47896429289944	7.49106220698426e-14	6.66113954753829e-13	yes	Bm6104	NA
WBGene00225855	14184.0589961546	1.67514247942328	0.224128135422485	7.47403924217553	7.77699324798898e-14	6.90965859470995e-13	yes	Bm5594	Bma-vps-53
WBGene00227816	475.892285511371	2.76338548499916	0.369921400087509	7.47019632912681	8.00752584551748e-14	7.1085865314598e-13	yes	Bm7555	NA
WBGene00231600	1214.65201265009	-2.85117673397723	0.381837428991755	-7.4669912310739	8.20492336362223e-14	7.27779419215333e-13	yes	Bm11339a	Bma-kdin-1
WBGene00234073	6520.35517290701	1.80481390383775	0.241730166147129	7.46623366294815	8.25227534816278e-14	7.30769672360035e-13	yes	Bm13812a	Bma-xpb-1
WBGene00227152	3701.38802482911	2.64931505688169	0.354837102780794	7.46628533521296	8.249037042025e-14	7.30769672360035e-13	yes	Bm6891	Bma-txdc-12.1
WBGene00231609	366.613252375928	-2.55730436468078	0.342886905699555	-7.45815696712999	8.77411062390559e-14	7.76338524650276e-13	yes	Bm11348a	NA
WBGene00232433	687.079232920972	-2.11638557488689	0.283896161416842	-7.45478756854136	9.00127427870036e-14	7.95780972741538e-13	yes	Bm12172a	NA
WBGene00224095	223.133520565857	-3.42333734053162	0.459250001800511	-7.45419124030543	9.04207625771174e-14	7.98729159945435e-13	yes	Bm3834a	Bma-syd-1
WBGene00225384	360.771058858464	-2.72633922719624	0.365929001466955	-7.45045955982376	9.30156500074355e-14	8.20974209085397e-13	yes	Bm5123	NA
WBGene00230955	5531.09334162703	-2.78765040334487	0.374212782478182	-7.44937247969983	9.37852406124059e-14	8.27085475853439e-13	yes	Bm10694	NA
WBGene00230563	15271.0276027227	1.5254937573643	0.204853829906148	7.44674267531726	9.56729687937904e-14	8.43039359066993e-13	yes	Bm10302	NA
WBGene00222620	9798.77333875659	1.74373154458216	0.23419912322786	7.44550842270071	9.65717694499969e-14	8.50260073670269e-13	yes	Bm2359a	Bma-aha-1.1
WBGene00227407	360.289102419758	-2.5051844176312	0.33647793763392	-7.44531553910314	9.67129778693671e-14	8.50804234704654e-13	yes	Bm7146	Bma-pod-1
WBGene00231883	272.574594346271	-5.35133880789906	0.719101079285866	-7.44170598827836	9.93932448068157e-14	8.73665806484849e-13	yes	Bm11622	NA
WBGene00223479	7317.90314379797	1.75947996292359	0.236463109973474	7.44082222009582	1.00060532041495e-13	8.78810328544774e-13	yes	Bm3218	NA
WBGene00224404	248.372723332763	-4.31391246697264	0.579783236869079	-7.44056087283318	1.00258703895622e-13	8.79829657855518e-13	yes	Bm4143	Bma-dpy-7.2
WBGene00230077	72390.9571595498	2.44644019118083	0.328851860632918	7.43933814597351	1.0119099729592e-13	8.87284399366434e-13	yes	Bm9816a	NA
WBGene00223316	435.126436030681	-3.29451469099276	0.442884399409817	-7.43876888728298	1.01627942089585e-13	8.90387080531397e-13	yes	Bm3055	Bma-etc-1
WBGene00229428	1245.2459291203	2.02234129809723	0.271887981920137	7.4381415604139	1.02111606027623e-13	8.93893675315347e-13	yes	Bm9167	Bma-ubc-13.2
WBGene00226333	437.289037952663	2.52011239743306	0.338884260904284	7.43649879374261	1.03388910501346e-13	9.0433647022198e-13	yes	Bm6072	Bma-cah-6
WBGene00227055	5925.31209465461	1.8120419196699	0.243680714228564	7.43613184739054	1.03676361656937e-13	9.06111105345905e-13	yes	Bm6794	Bma-dnc-6
WBGene00226308	3240.73392228393	2.0528597902512	0.276121116067611	7.43463527703741	1.04856871634646e-13	9.15681645937436e-13	yes	Bm6047	NA
WBGene00227444	620.233389425741	-2.95713693276017	0.397857609838253	-7.43265143014955	1.06442133707282e-13	9.28768292079417e-13	yes	Bm7183	NA
WBGene00225205	1874.54221468925	1.69497627828346	0.228115521500523	7.43034172832282	1.08317472908037e-13	9.44362670634353e-13	yes	Bm4944a	NA
WBGene00225586	1281.9495139588	1.88630910660527	0.253873065139547	7.43012696352176	1.08493490180735e-13	9.45128249826483e-13	yes	Bm5325	Bma-nth-1
WBGene00224728	1195.97193185182	-2.94810294424046	0.396872962403167	-7.42832902092635	1.09978120489704e-13	9.57283152759689e-13	yes	Bm4467	Bma-ptr-11
WBGene00231273	4311.13923864384	1.98946753907361	0.267863826560179	7.42716015305878	1.1095399006644e-13	9.64993509384659e-13	yes	Bm11012	NA
WBGene00224102	643.108606818622	-2.78273528833287	0.374688873848631	-7.42678921781131	1.1126545323647e-13	9.6691754373786e-13	yes	Bm3841	NA
WBGene00224143	424.959021853804	-3.71951188929148	0.500929155524928	-7.42522540017415	1.12588018244534e-13	9.77618002828351e-13	yes	Bm3882	NA
WBGene00223394	9257.95961113115	1.48666144066024	0.20028494722327	7.42273176926755	1.14728978861317e-13	9.95401626314991e-13	yes	Bm3133a	Bma-dnpp-1
WBGene00226791	563.339766109395	-2.89093251918531	0.38953751374328	-7.42144830007451	1.15846474285769e-13	1.00428395790616e-12	yes	Bm6530	NA
WBGene00228662	350.754358779865	-3.90176107116393	0.525938253970115	-7.41866757496904	1.18304427567985e-13	1.02476308924087e-12	yes	Bm8401	Bma-col-186
WBGene00222581	25235.5015379946	1.76631983854211	0.238278750344541	7.41282987252571	1.23632444787107e-13	1.07004979474463e-12	yes	Bm2320	Bma-rps-3
WBGene00226016	328.033813411405	-6.21389263219753	0.838596232751782	-7.40987425117231	1.26419229784365e-13	1.0932865594346e-12	yes	Bm5755	NA
WBGene00223837	2856.34513355816	-1.98951031097249	0.268501074112587	-7.4096921866996	1.26592898062456e-13	1.09390556672517e-12	yes	Bm3576a	Bma-cdh-4
WBGene00222604	1278.85764720241	2.57700019515461	0.3481843485497	7.40125225584849	1.34906178296044e-13	1.1648023371814e-12	yes	Bm2343	NA
WBGene00222104	2767.33343296978	1.78035001246993	0.240564040590809	7.40073207989652	1.35435742789669e-13	1.16843315941329e-12	yes	Bm1843a	Bma-mppe-1.1
WBGene00222073	498.311670145884	2.3611952247271	0.319072679755252	7.40017987919956	1.3600014529305e-13	1.17235845278764e-12	yes	Bm1812	NA
WBGene00222093	333.87812617429	-4.48965834643222	0.606717111667554	-7.3999204243514	1.36266130709419e-13	1.17370706635967e-12	yes	Bm1832	NA
WBGene00224569	7201.82991634232	1.72494794763552	0.233144831633251	7.39861113605536	1.37616192366701e-13	1.18438353510779e-12	yes	Bm4308a	Bma-fmo-4
WBGene00229100	824.827937782802	-2.264480276146	0.306306608509235	-7.39285478418833	1.43709400971805e-13	1.23583164639879e-12	yes	Bm8839a	Bma-cdc-7
WBGene00226602	723.039365837886	-4.56989648081042	0.618181484455671	-7.39248359215153	1.4411128789222e-13	1.23829386508832e-12	yes	Bm6341	Bma-rpl-7A.1
WBGene00223039	2627.38164067193	1.65394410336361	0.22385181526045	7.3885668581211	1.48419791427329e-13	1.27429332142935e-12	yes	Bm2778a	NA
WBGene00226796	3520.86524858502	1.51874394093958	0.205742645032456	7.38176541231884	1.56204246027006e-13	1.34005484081615e-12	yes	Bm6535	NA
WBGene00228198	323.494514216892	-2.7236237054121	0.369199386297142	-7.37710788939409	1.61764919242787e-13	1.38664888774917e-12	yes	Bm7937	NA
WBGene00229189	2256.00087397291	1.87916329491091	0.254783974895968	7.37551604522301	1.63709681006455e-13	1.40219762748534e-12	yes	Bm8928	NA
WBGene00229749	2280.34458292368	1.74284046386367	0.236462641391117	7.37046855947511	1.70029363130826e-13	1.45516343925463e-12	yes	Bm9488	NA
WBGene00223095	2378.26643304398	-3.62197420676971	0.491448055891998	-7.37000414051019	1.70622737433409e-13	1.45907632210612e-12	yes	Bm2834a	Bma-cho-1
WBGene00222119	2639.71871118088	1.56025220760677	0.211810460266077	7.36626607414373	1.75473431360294e-13	1.49936030065833e-12	yes	Bm1858a	NA
WBGene00224893	4559.19898201377	1.8714293612674	0.254124055721616	7.36423537690379	1.78165093744368e-13	1.52114659718797e-12	yes	Bm4632a	Bma-ctg-1
WBGene00223085	361.305049200859	-4.48048193733837	0.608514141291593	-7.36298737089066	1.79839391911075e-13	1.53421901618405e-12	yes	Bm2824	NA
WBGene00234179	1190.97611586001	1.95286896998232	0.26535015599801	7.35959231920319	1.8447274215799e-13	1.57249437726561e-12	yes	Bm13918	Bma-ufd-1
WBGene00224365	3305.88702214606	1.8750437879094	0.254830428198583	7.35800587537463	1.86677831851829e-13	1.59002620690965e-12	yes	Bm4104a	Bma-cla-1
WBGene00223409	955.659257881382	-2.18494757131383	0.29699581260091	-7.3568295531825	1.8832956957665e-13	1.60282076093233e-12	yes	Bm3148a	NA
WBGene00255590	1433.80223850945	1.90215475990781	0.258669879946986	7.3535997322056	1.92938926418519e-13	1.64033735440247e-12	yes	Bm16941	Bma-dss-1
WBGene00224369	364.635901451615	-3.37567876464222	0.459055734270564	-7.35352706138428	1.93043901437379e-13	1.64033735440247e-12	yes	Bm4108	Bma-cnep-1
WBGene00230839	6071.09058122756	1.47145112771518	0.200125591371399	7.35263849881354	1.94332001241849e-13	1.6486677698388e-12	yes	Bm10578a	Bma-rde-12.2
WBGene00230664	830.99678602288	2.3099810023732	0.314166042445306	7.35273928523115	1.94185473259648e-13	1.6486677698388e-12	yes	Bm10403	NA
WBGene00222972	560.619930704583	2.1413843226441	0.291289889688132	7.35138567609321	1.96162505623946e-13	1.66288073398781e-12	yes	Bm2711	Bma-ets-5
WBGene00233077	617.85962932058	2.10552729348438	0.286516303978845	7.34871720821807	2.00118064389582e-13	1.69507119362401e-12	yes	Bm12816	NA
WBGene00223560	2588.54526063743	1.62769660568443	0.221526827116636	7.34762749446787	2.01755823612617e-13	1.7075937203864e-12	yes	Bm3299a	NA
WBGene00222084	6324.42512614722	1.5381831235873	0.209414837442899	7.34514871233379	2.05530450748648e-13	1.73816793983565e-12	yes	Bm1823a	NA
WBGene00227287	687.614024664218	-2.59375107944662	0.353551539118364	-7.33627432626809	2.19621638950544e-13	1.85440966221834e-12	yes	Bm7026	Bma-trp-4
WBGene00223165	4078.98977518775	1.71198284895316	0.233358387667203	7.33628161416105	2.19609686252769e-13	1.85440966221834e-12	yes	Bm2904	Bma-ril-1
WBGene00233208	2373.96928337607	-1.6903662116024	0.230436344229867	-7.33550177274209	2.20892316619775e-13	1.86367021463062e-12	yes	Bm12947a	NA
WBGene00233115	908.255138527083	2.62178995261483	0.357446295886262	7.33478002930285	2.22085946925003e-13	1.87226665720016e-12	yes	Bm12854	NA
WBGene00224311	367.496018509271	2.73136699352359	0.372794756233918	7.32673125855273	2.3583407041226e-13	1.98504482676148e-12	yes	Bm4050a	Bma-mig-13
WBGene00224676	1539.09362681582	-2.34184088849473	0.31962868199291	-7.32675451368496	2.35793168576197e-13	1.98504482676148e-12	yes	Bm4415	Bma-rskd-1
WBGene00228342	313.673671929476	-3.06387561724929	0.418325908888985	-7.32413544594097	2.40443744982125e-13	2.0222564579933e-12	yes	Bm8081	NA
WBGene00225008	7520.76096218818	1.69536981005275	0.231484165980967	7.32391264373629	2.40843499307081e-13	2.02402987849049e-12	yes	Bm4747	Bma-rps-25
WBGene00229074	302.457807390965	-3.72643283255375	0.508949701690654	-7.32180964086452	2.44649039948132e-13	2.0544000494077e-12	yes	Bm8813	Bma-eya-1
WBGene00229609	1280.35536406169	2.12366233106633	0.290172185108362	7.31862818027602	2.5051865989675e-13	2.10204184870296e-12	yes	Bm9348	NA
WBGene00231147	266.085364179574	-4.11246941485571	0.562112758159647	-7.31609335521916	2.55294090512899e-13	2.14043519549742e-12	yes	Bm10886a	Bma-mep-1.1
WBGene00230686	235.850243226882	4.25555611455607	0.58186181626927	7.31368856929206	2.59907136661431e-13	2.17740810737079e-12	yes	Bm10425	NA
WBGene00222524	3289.23681430491	1.52751190291789	0.208880209977119	7.31286081666243	2.6151386009112e-13	2.18915703974715e-12	yes	Bm2263a	Bma-spe-9
WBGene00222506	286.841992675251	-3.89409244181007	0.532507248333097	-7.31275011560822	2.61729476568132e-13	2.18925163265225e-12	yes	Bm2245	Bma-skpo-2
WBGene00228353	727.614050443379	-2.31777637579852	0.317179078420214	-7.30746929256101	2.72220507717861e-13	2.27522834648743e-12	yes	Bm8092a	NA
WBGene00268476	1081.06559125505	2.39360851599736	0.327650215793081	7.30537750510435	2.76489367727945e-13	2.30910644988693e-12	yes	Bm17333	NA
WBGene00226304	1429.99483947509	2.24464232613342	0.307299895750176	7.30440314876722	2.78500187120981e-13	2.32408839953373e-12	yes	Bm6043a	Bma-dmsr-7
WBGene00227370	3806.12990172818	1.78455017844127	0.244392324626816	7.3019894596373	2.83543487350728e-13	2.36433343732533e-12	yes	Bm7109	NA
WBGene00231140	280.891598574715	2.83361471899642	0.388265712270658	7.29813277207729	2.91788633591625e-13	2.43119378610751e-12	yes	Bm10879a	NA
WBGene00223667	443.31406417097	-2.40940680803047	0.33022248165917	-7.29631367290513	2.95758946882665e-13	2.46235984137355e-12	yes	Bm3406	NA
WBGene00222776	10100.5901012649	1.54098393074689	0.211224913453276	7.29546484623254	2.97629681166681e-13	2.47601089573058e-12	yes	Bm2515a	Bma-ric-19
WBGene00226532	4688.51823360512	1.53784081424125	0.21080648400024	7.29503564150095	2.98580027176064e-13	2.48198990782896e-12	yes	Bm6271	Bma-nduf-7
WBGene00225451	397.957044824221	-5.57191350063056	0.763837880831033	-7.2946284027816	2.99484491223959e-13	2.48757854532149e-12	yes	Bm5190	NA
WBGene00227344	613.190563274635	-3.38816663873215	0.465181614953998	-7.28353513942552	3.25184171081983e-13	2.69895305433264e-12	yes	Bm7083	NA
WBGene00226832	1965.26183683977	1.76700272802923	0.242608689882189	7.28334475111872	3.256436287587e-13	2.70067452178752e-12	yes	Bm6571a	Bma-sorb-1
WBGene00228158	12502.1741099435	1.65745958396219	0.227658753760301	7.28045619413038	3.32693206140988e-13	2.75700518468731e-12	yes	Bm7897a	NA
WBGene00223779	7911.3188131591	1.43690867205576	0.197435036298409	7.27788086144943	3.39104593112829e-13	2.80796423122408e-12	yes	Bm3518	Bma-nduf-6
WBGene00223413	427.233731684534	-3.7947899898719	0.521488395324489	-7.27684455473002	3.41718618316681e-13	2.82742470676698e-12	yes	Bm3152	Bma-lin-28
WBGene00224082	441.975798636692	-4.61731632497464	0.634544359058815	-7.27658556735617	3.42374984066858e-13	2.83066971780586e-12	yes	Bm3821	NA
WBGene00231255	847.520543135366	1.87997038306253	0.258416549852077	7.27496123657199	3.46519939681888e-13	2.86273026498954e-12	yes	Bm10994a	Bma-mks-1
WBGene00225000	1234.84868615498	2.22216881011552	0.305465110901459	7.27470578737348	3.47176262093416e-13	2.86485453375768e-12	yes	Bm4739a	NA
WBGene00222973	1554.54018119731	1.90629909247713	0.262046735285978	7.27465308963586	3.47311809552145e-13	2.86485453375768e-12	yes	Bm2712a	Bma-acn-1
WBGene00230874	856.389814012019	-3.98694132503222	0.54843383271324	-7.26968521491065	3.60326166842578e-13	2.96991913670633e-12	yes	Bm10613a	NA
WBGene00268891	437.595450592212	-3.22839773309151	0.444275385691315	-7.26665900715603	3.68487413148147e-13	3.03485213826471e-12	yes	Bm17749	NA
WBGene00233489	3860.34953760072	1.68700518142104	0.232281233696151	7.26277002483906	3.79242419999449e-13	3.12103112925814e-12	yes	Bm13228	Bma-mek-2.1
WBGene00234963	8320.6232700146	1.65047483860116	0.227262693926737	7.26240990143869	3.80253799285625e-13	3.12562979618695e-12	yes	Bm14778	Bma-hip-1
WBGene00221333	650.242359500562	-2.9927424793104	0.41208933233714	-7.26236338693175	3.80384624752943e-13	3.12562979618695e-12	yes	Bm1072a	NA
WBGene00226667	353.6881952522	-2.80107947209254	0.385941886555959	-7.25777524976263	3.93508668655761e-13	3.23099263191301e-12	yes	Bm6406a	NA
WBGene00228705	4829.93238353488	1.87788914581603	0.258802732714266	7.25606382174231	3.98517104280035e-13	3.26961008603413e-12	yes	Bm8444a	NA
WBGene00231318	1518.73186244307	-1.76890068038452	0.244000499058589	-7.24957812467331	4.18071761369068e-13	3.42742075215728e-12	yes	Bm11057a	Bma-mel-28
WBGene00234303	8841.635905574	1.58773898091076	0.219058959891131	7.24799835487142	4.22975749567621e-13	3.46497336132803e-12	yes	Bm14042	Bma-rps-5
WBGene00223849	561.357479970936	-3.10439172989174	0.428357149487571	-7.24720419305576	4.25462311394181e-13	3.48268041756199e-12	yes	Bm3588	Bma-rtel-1
WBGene00223634	2589.59438140221	1.70306887906325	0.235034146153321	7.24604874200822	4.29105742444731e-13	3.50982292388954e-12	yes	Bm3373	Bma-mrp-5
WBGene00249823	427.643043131819	-3.91597657989444	0.540462253798995	-7.24560605734892	4.30509742350428e-13	3.51862081562535e-12	yes	Bm16901	Bma-polq-1.2
WBGene00223518	1159.09178206397	2.01956392337639	0.278830908022896	7.24297007708541	4.38963787107872e-13	3.58498245340004e-12	yes	Bm3257a	Bma-dmd-5
WBGene00224304	52882.4338923244	1.67712213718262	0.231750202935002	7.23676663900484	4.59507787580084e-13	3.74990551707586e-12	yes	Bm4043a	Bma-ess-2
WBGene00227865	397.279254656657	-2.50186791774321	0.34576145122389	-7.23582084956943	4.6272180851853e-13	3.77326040964692e-12	yes	Bm7604a	Bma-ace-1
WBGene00231241	339.53175921749	-3.001674164802	0.41499393054821	-7.23305557947985	4.72246011983641e-13	3.84799697217089e-12	yes	Bm10980	NA
WBGene00221830	266.517391075942	-4.28892071669581	0.593103334798974	-7.23132119658287	4.78317558936427e-13	3.8945080881488e-12	yes	Bm1569a	NA
WBGene00224717	547.930809854341	-2.22832194783018	0.308158533532208	-7.23108953787021	4.79134306092866e-13	3.89819596794614e-12	yes	Bm4456	NA
WBGene00226223	633.732621494764	-2.09015796218348	0.289098534377744	-7.22991545661875	4.83294806908436e-13	3.92906210623968e-12	yes	Bm5962a	Bma-dpl-1
WBGene00226235	4808.53678501251	-3.17584422012159	0.439306377988372	-7.22922402052094	4.85761570337994e-13	3.94612223364034e-12	yes	Bm5974a	Bma-mtm-3
WBGene00230887	288.769327084963	-3.86460467284201	0.534936646248964	-7.22441563863881	5.03261157822944e-13	4.08518432278246e-12	yes	Bm10626	NA
WBGene00224708	1616.98471425879	2.66116670094625	0.36854389811148	7.2207590861843	5.16981710647789e-13	4.19338306554963e-12	yes	Bm4447	Bma-dyf-3
WBGene00225913	891.091025914645	3.01702420267257	0.417972401729384	7.21823783146798	5.26655508573501e-13	4.26861858877841e-12	yes	Bm5652	NA
WBGene00230215	1445.69235445566	2.09865786104653	0.290814529203337	7.21648215718671	5.33496595798842e-13	4.32079820406999e-12	yes	Bm9954	NA
WBGene00268533	1694.96905397782	1.73547485227112	0.240554642172854	7.21447250651714	5.41434447750608e-13	4.38177500577625e-12	yes	Bm17390	NA
WBGene00226312	1465.35313997195	-1.75428848587049	0.243207614408703	-7.21313142327222	5.46795937489268e-13	4.42182526052642e-12	yes	Bm6051	Bma-skp-1
WBGene00228358	371.540425844449	-3.50363390262926	0.485793461768887	-7.21218826180103	5.50597768793122e-13	4.44921198538334e-12	yes	Bm8097	NA
WBGene00228911	238.442095888735	-5.49420362746829	0.761843075013019	-7.21172615157576	5.52469970287409e-13	4.46097643679697e-12	yes	Bm8650	NA
WBGene00224389	50657.2238305815	1.92576662874694	0.267064240040297	7.21087416441965	5.55938124392553e-13	4.48560015276069e-12	yes	Bm4128	Bma-ned-8
WBGene00234370	11557.2074456594	2.72084277801771	0.377366253996695	7.21008502800977	5.59169496988115e-13	4.50827777293277e-12	yes	Bm14109	NA
WBGene00226626	171.439523050661	-6.08292054750275	0.843948808938139	-7.20768900089606	5.69094210471402e-13	4.5848454625572e-12	yes	Bm6365	Bma-spd-1.2
WBGene00227814	1965.82101311438	1.84112297226559	0.255511900907027	7.20562512246943	5.7778160217671e-13	4.65133724066375e-12	yes	Bm7553	NA
WBGene00225480	721.832458933388	2.91901489422825	0.405363105967241	7.20098808021307	5.9777773859889e-13	4.80870005186719e-12	yes	Bm5219	NA
WBGene00230143	635.704824198831	-3.01115229790405	0.418299052469675	-7.19856351604418	6.08501996054568e-13	4.89129699004103e-12	yes	Bm9882	NA
WBGene00222908	293.65430853542	-2.67973036900387	0.372441143819787	-7.19504387061091	6.24406853086607e-13	5.00412822051084e-12	yes	Bm2647	NA
WBGene00226817	388.580620773116	-2.47526160141564	0.344020785650895	-7.19509315907291	6.2418133185253e-13	5.00412822051084e-12	yes	Bm6556	Bma-cdap-2
WBGene00222114	8902.85110554745	1.55796046744293	0.216526422706293	7.19524410910451	6.23491151571365e-13	5.00412822051084e-12	yes	Bm1853	Bma-exos-4.1
WBGene00229626	1054.24180816772	-2.20607021946572	0.306607683033582	-7.19509112635022	6.24190631071511e-13	5.00412822051084e-12	yes	Bm9365	NA
WBGene00223312	1674.1817461156	1.75126335784252	0.243414172426677	7.19458255196728	6.26521515886161e-13	5.01732290188357e-12	yes	Bm3051	Bma-glrx-3
WBGene00229245	770.131424370714	2.32750894434882	0.323646783953986	7.19150957075393	6.40788414573692e-13	5.12774298891494e-12	yes	Bm8984a	NA
WBGene00223906	10959.1846580064	1.69408359322193	0.23560818717685	7.1902577474964	6.46691234966331e-13	5.1711168527345e-12	yes	Bm3645	NA
WBGene00222460	752.300448367547	-2.50552409237532	0.34853169886553	-7.18879832316772	6.53640386974481e-13	5.22278653723457e-12	yes	Bm2199	NA
WBGene00227818	523.366154254165	-2.85050349869223	0.396572715205393	-7.1878457326947	6.58215698085625e-13	5.25542563709945e-12	yes	Bm7557a	NA
WBGene00224122	7525.83934290992	1.80789663727875	0.251539960733265	7.18731382484335	6.60784125488253e-13	5.27200439657977e-12	yes	Bm3861	NA
WBGene00222755	1003.33975916867	3.19110672592607	0.444077607761408	7.1859212672587	6.67555066160474e-13	5.32206289725408e-12	yes	Bm2494	Bma-zmp-3.2
WBGene00230488	219.516146471412	-7.59958407723954	1.05758184209976	-7.18581179698684	6.6809021445917e-13	5.32236925496655e-12	yes	Bm10227	Bma-hxk-1.3
WBGene00225243	3964.70569072113	1.59342907794041	0.22195832826213	7.17895602483809	7.02457340015283e-13	5.5919988100028e-12	yes	Bm4982	Bma-istr-1
WBGene00229057	504.371524565686	-3.25738974443648	0.453838708176961	-7.17741718753164	7.10406612454841e-13	5.65108155341768e-12	yes	Bm8796	NA
WBGene00227153	451.948080436345	-2.48452349921004	0.346251980398803	-7.17547809069118	7.20549367230854e-13	5.72751221801083e-12	yes	Bm6892a	Bma-parn-2
WBGene00223620	326.423364481144	-3.13464508230459	0.436937615675663	-7.17412502344825	7.27710863743613e-13	5.78014967013552e-12	yes	Bm3359a	NA
WBGene00225920	1431.00791645366	-2.97161207866799	0.414274389122873	-7.17305282848806	7.33435339949997e-13	5.82130345745498e-12	yes	Bm5659a	Bma-cal-4
WBGene00224820	164.706119252462	-7.16402182142913	0.998909815864972	-7.17184044810461	7.39961528887326e-13	5.86875483495758e-12	yes	Bm4559a	Bma-lips-9
WBGene00225424	336.022212834789	-2.45602563889455	0.342470912719498	-7.17148682611233	7.41875774500489e-13	5.87958500279049e-12	yes	Bm5163	NA
WBGene00224973	381.118598938168	-3.20050044368738	0.446400882227993	-7.16956567763406	7.52360687063583e-13	5.95827402947989e-12	yes	Bm4712	Bma-sgcb-1
WBGene00223114	11928.4710850852	1.61753365139516	0.225633032310886	7.16886900303878	7.56198702056497e-13	5.98424600630382e-12	yes	Bm2853a	Bma-rps-2.1
WBGene00268493	1163.41967096627	-2.41815231818352	0.337640511330579	-7.16191403885162	7.95583073663519e-13	6.29127131682997e-12	yes	Bm17350	NA
WBGene00223282	416.935354536694	-3.27920641244081	0.458137054130877	-7.15769742454412	8.20433886218774e-13	6.48300080444998e-12	yes	Bm3021a	NA
WBGene00230526	1018.85435421888	1.99612411979512	0.279120053590518	7.15148945451097	8.58413163135563e-13	6.77811130655679e-12	yes	Bm10265	NA
WBGene00222591	257.273966980972	-3.13389976784959	0.438346810933715	-7.14936139531649	8.71825269131052e-13	6.87894533044125e-12	yes	Bm2330	Bma-elf-1
WBGene00227154	257.806021273454	-5.70592925755844	0.798435633948849	-7.14638602655852	8.90922950442403e-13	7.02445872994139e-12	yes	Bm6893	NA
WBGene00223199	481.618735313815	-3.851618854527	0.538999227697319	-7.14587082245305	8.94271282912256e-13	7.04567411500355e-12	yes	Bm2938	NA
WBGene00230083	776.702434286613	-3.96066179822373	0.554376598838076	-7.14435242491282	9.04211412354842e-13	7.11875480042773e-12	yes	Bm9822	NA
WBGene00221942	2936.83896774031	1.70186194148765	0.238221598531859	7.14402871937766	9.06344519131554e-13	7.1303094878815e-12	yes	Bm1681a	NA
WBGene00228562	1031.93855374982	1.77429283791278	0.248559346999307	7.13830664319263	9.44876622702599e-13	7.42799193856078e-12	yes	Bm8301a	Bma-cht-1.1
WBGene00231417	322.754852214404	-3.19096716513734	0.447196394859473	-7.13549393916752	9.64402090373037e-13	7.57592991081165e-12	yes	Bm11156	Bma-gly-3
WBGene00224151	6563.47323835601	1.45923254479072	0.204613789241033	7.13164322992797	9.91776744666651e-13	7.78526580154078e-12	yes	Bm3890	NA
WBGene00225809	481.280330869581	-2.89414635507234	0.406089609214394	-7.12686631079098	1.02679733393861e-12	8.05427044886688e-12	yes	Bm5548	NA
WBGene00233204	782.492523257327	-2.5667233096793	0.360195579642211	-7.12591562680717	1.03391040401466e-12	8.10413312290932e-12	yes	Bm12943a	NA
WBGene00230542	1538.04637406371	1.89302685869157	0.265660321975371	7.12574179168189	1.03521626743184e-12	8.10843735784517e-12	yes	Bm10281	NA
WBGene00224324	901.006360166211	-2.13884902469481	0.300392939547931	-7.12017076005054	1.07793430581896e-12	8.4368634673851e-12	yes	Bm4063	Bma-patr-1
WBGene00234100	4737.40096080795	1.51428192690706	0.212688265384228	7.1197248431711	1.08142736920718e-12	8.45802500806933e-12	yes	Bm13839	Bma-pgk-1
WBGene00230867	436.064083477984	-3.80645056286933	0.534701769061865	-7.11882919248192	1.08847699120341e-12	8.5069518313235e-12	yes	Bm10606	NA
WBGene00268405	294.517520433909	3.67166239458489	0.515817912086446	7.11813666906851	1.09395870564595e-12	8.54356234037635e-12	yes	Bm17262	NA
WBGene00224239	1620.16306151965	1.72293567479924	0.242086446944018	7.11702656860286	1.10280234765335e-12	8.60635626737483e-12	yes	Bm3978	Bma-rnf-5
WBGene00234285	2607.04868016772	1.73979169437104	0.244481896422529	7.1162393609882	1.10911613308867e-12	8.64932996073153e-12	yes	Bm14024	NA
WBGene00222530	826.513294517786	2.2724332224995	0.319423790325356	7.11416397690625	1.12593224570229e-12	8.77408291832731e-12	yes	Bm2269a	NA
WBGene00231323	1051.04262628863	2.23637875270479	0.314380971026977	7.11359452004775	1.13058993376131e-12	8.80397611936947e-12	yes	Bm11062	NA
WBGene00222816	441.579956888792	-4.05987448100351	0.571082491984422	-7.1090858816142	1.16814045396767e-12	9.08977847804183e-12	yes	Bm2555a	NA
WBGene00222739	233.342976659026	-3.15227250532939	0.443573459787706	-7.10653993329101	1.18988241707055e-12	9.25224245203987e-12	yes	Bm2478a	NA
WBGene00223802	1548.77616793656	2.04768201775898	0.288167768185566	7.10586763624576	1.1956896812326e-12	9.29065622509597e-12	yes	Bm3541	NA
WBGene00268646	518.841516900587	2.84218949915198	0.40057517940096	7.09527111340831	1.29098151795532e-12	1.00238166412256e-11	yes	Bm17503a	NA
WBGene00223663	1256.01297868452	1.79022814318516	0.252382693638527	7.09330785473427	1.3094371895182e-12	1.01597534291727e-11	yes	Bm3402	Bma-rtcb-1
WBGene00230617	316.271721842758	-4.04944247791895	0.571064365077786	-7.09104389199169	1.33104117230808e-12	1.0319903155775e-11	yes	Bm10356	NA
WBGene00223380	559.683438977036	-2.2032177431525	0.310827598767564	-7.08823074877614	1.35837348945026e-12	1.0524202414649e-11	yes	Bm3119	NA
WBGene00228076	243.121588057974	3.817795296925	0.538758766188297	7.08627967937448	1.37765259644126e-12	1.06581570908795e-11	yes	Bm7815	NA
WBGene00225082	271.873708702706	-4.62382583956028	0.652503309193316	-7.08628718722772	1.37757789697962e-12	1.06581570908795e-11	yes	Bm4821a	NA
WBGene00255633	189.128468233834	-4.77801043617388	0.674432349748017	-7.08449177735772	1.39555497763464e-12	1.07888683877022e-11	yes	NA	NA
WBGene00222020	16918.9995522337	1.38655948355125	0.195790406890309	7.081856080559	1.42236337381935e-12	1.09881928986837e-11	yes	Bm1759	Bma-rbm-26
WBGene00221367	171.982898045925	-4.02583298612104	0.568661998834854	-7.07948305736918	1.44693187713577e-12	1.11699388065632e-11	yes	Bm1106	NA
WBGene00233052	603.982349478899	3.15504235252472	0.445701280107369	7.07882721755851	1.45379507299848e-12	1.12148410418853e-11	yes	Bm12791	NA
WBGene00227174	341.194381043117	-3.38338906813521	0.478025828085799	-7.07783736641096	1.46421413535056e-12	1.12870895397707e-11	yes	Bm6913a	NA
WBGene00222180	367.475335655416	-3.08924433475379	0.436534251187219	-7.07675131184354	1.47573012024399e-12	1.1367683852203e-11	yes	Bm1919a	NA
WBGene00222982	3189.43321693922	1.55256107109648	0.219394556497667	7.07657061269429	1.47765476778066e-12	1.13743324976794e-11	yes	Bm2721a	NA
WBGene00230116	390.576569627363	-3.18301086374963	0.449838739663468	-7.0758931659174	1.48489228005362e-12	1.14218383207283e-11	yes	Bm9855a	Bma-wdr-60
WBGene00223427	350.439679999422	-2.73238199962228	0.386211869213509	-7.07482658465824	1.49635765769882e-12	1.15017735310207e-11	yes	Bm3166	NA
WBGene00226284	592.294254819791	2.25952615251676	0.319501270580537	7.07204121101358	1.52671061910861e-12	1.17266697374543e-11	yes	Bm6023	NA
WBGene00228286	1570.87046712551	-1.95197549243149	0.276287204525625	-7.06502313700325	1.60589234367603e-12	1.23260289845907e-11	yes	Bm8025	Bma-gon-4
WBGene00227438	1577.03825967682	1.98080268153826	0.28039745284098	7.06426774376448	1.61465156059108e-12	1.23843890277262e-11	yes	Bm7177	Bma-soem-1
WBGene00234072	1024.58366562761	-2.08170039423932	0.294755370081323	-7.06246808553473	1.63570891730642e-12	1.25369249277098e-11	yes	Bm13811	Bma-rnr-1
WBGene00224802	532.923497211877	-3.05406208440298	0.432466075398627	-7.06196915350619	1.64159434225825e-12	1.25730402982825e-11	yes	Bm4541a	Bma-gei-13
WBGene00229322	490.294781329027	2.08655179983132	0.295610051292287	7.05846026111007	1.6835762768297e-12	1.28853712901644e-11	yes	Bm9061	NA
WBGene00221624	173.373884799813	-3.88892890041763	0.551020256898113	-7.05768771970341	1.69295981672527e-12	1.29479403541836e-11	yes	Bm1363	NA
WBGene00231240	1266.50458910147	1.66545124335744	0.236026431607412	7.05620651049636	1.71109477945791e-12	1.30773042524191e-11	yes	Bm10979	Bma-arl-3
WBGene00226407	4075.96470201754	1.80996146205658	0.256521430220386	7.05579046749264	1.71622273026745e-12	1.31071465109164e-11	yes	Bm6146a	NA
WBGene00222479	104.562536588938	-6.41427973411926	0.909285009740449	-7.05420155991595	1.73594596243117e-12	1.32483340366453e-11	yes	Bm2218a	Bma-cky-1
WBGene00223605	655.388867023673	-2.75556237647889	0.390701142391504	-7.05286490746336	1.75271000336453e-12	1.33667528014597e-11	yes	Bm3344	Bma-sinh-1
WBGene00231163	1397.85186972487	-2.18192873722395	0.309400545338999	-7.05211664974053	1.762163739277e-12	1.34292919390847e-11	yes	Bm10902a	NA
WBGene00268710	703.81875309655	-2.25151469029421	0.319277169806293	-7.05191258009526	1.76475069254352e-12	1.34394482378137e-11	yes	Bm17567	Bma-plpp-1.2
WBGene00224432	4341.83358246465	1.56556875253571	0.222053052558079	7.05042661877491	1.78370061429241e-12	1.35741136947039e-11	yes	Bm4171a	Bma-rrc-1
WBGene00226868	998.980484527813	1.77609080067887	0.251949773508965	7.04938439095547	1.79711072174134e-12	1.36664594630649e-11	yes	Bm6607	NA
WBGene00224976	422.137779026124	-3.8854207292404	0.55121446669504	-7.04883663982283	1.80419810792507e-12	1.37101071983484e-11	yes	Bm4715a	Bma-cbn-1
WBGene00231185	6417.61080625314	1.7332637916012	0.245900265335451	7.04864547110889	1.80667810078755e-12	1.37101071983484e-11	yes	Bm10924a	NA
WBGene00269109	102.952698471259	-9.57587108813873	1.35854076582428	-7.04864464065508	1.80668888138759e-12	1.37101071983484e-11	yes	Bm17967	NA
WBGene00269178	1925.89826499062	1.69038821253412	0.239875140928187	7.04695036756721	1.82881512830971e-12	1.38681911534597e-11	yes	Bm18038	NA
WBGene00228476	987.742781210693	-1.8506891616252	0.262885079817078	-7.03991707293906	1.92354277673333e-12	1.45762099382586e-11	yes	Bm8215	Bma-phf-10
WBGene00225659	1708.77961754184	-2.39445434472953	0.340237226139801	-7.03760247488518	1.95575696766603e-12	1.48098486986159e-11	yes	Bm5398a	NA
WBGene00225377	226.502252077266	-3.3162817852249	0.471235490241783	-7.037419408974	1.9583273140807e-12	1.48188398095866e-11	yes	Bm5116	NA
WBGene00221656	360.676954086675	-4.68741944071138	0.666096351269308	-7.03714925292575	1.96212650832427e-12	1.48371104704972e-11	yes	Bm1395	NA
WBGene00224560	768.187209574189	-2.30086268890668	0.32716774867551	-7.0326696265796	2.02618743001393e-12	1.53037748111177e-11	yes	Bm4299a	NA
WBGene00223716	446.807781865581	-4.10586303728638	0.583829999832971	-7.03263456564589	2.0266968228629e-12	1.53037748111177e-11	yes	Bm3455	NA
WBGene00223023	10070.7700264538	1.63889968203313	0.23307697196535	7.03158131931102	2.04205791898771e-12	1.5408908874615e-11	yes	Bm2762a	Bma-ssb-1
WBGene00230489	2093.35815548463	1.55365439009804	0.220971539037976	7.03101583517067	2.05035229369023e-12	1.54606086044271e-11	yes	Bm10228a	NA
WBGene00226459	4983.79150602573	1.40727496795339	0.200156546664911	7.03087154231009	2.05247403036071e-12	1.54657237941737e-11	yes	Bm6198a	NA
WBGene00226646	1576.26535795484	2.42262763043535	0.344670442150447	7.02882328789276	2.08282561760187e-12	1.56833988001434e-11	yes	Bm6385	NA
WBGene00268347	326.653792846484	-3.28147753006257	0.466910332013485	-7.02806792882834	2.09412948616992e-12	1.57574420254991e-11	yes	Bm17204	NA
WBGene00255484	861.573096040554	1.81311185773811	0.258051051792901	7.0261750345169	2.1227214549496e-12	1.59613757121298e-11	yes	Bm16922a	NA
WBGene00224459	242.545597860934	-3.14221632654534	0.447244795813031	-7.02571914969567	2.12966455817461e-12	1.60023532544467e-11	yes	Bm4198a	NA
WBGene00225275	12563.2077900679	1.37031237723681	0.195137752051827	7.0222822740772	2.18272986509123e-12	1.63895939064138e-11	yes	Bm5014a	NA
WBGene00234035	7730.70519231731	2.04059240274572	0.290686086624361	7.01991769348998	2.21998982123643e-12	1.6657696732877e-11	yes	Bm13774a	Bma-rpl-10.2
WBGene00225296	645.167693490101	-2.40721979131145	0.343025863555979	-7.0176043472553	2.2570459018455e-12	1.69238956181067e-11	yes	Bm5035a	Bma-scm-1
WBGene00304241	27065.4710559338	1.44999043612485	0.206674119420722	7.01582975260262	2.28588260656649e-12	1.71281343561958e-11	yes	Bm18583	NA
WBGene00224256	1196.76565791267	-1.73709361512214	0.247620012194163	-7.0151584265332	2.29688542755893e-12	1.7198551611666e-11	yes	Bm3995a	Bma-smk-1
WBGene00229134	3436.03001574605	1.74055562119374	0.248129990348146	7.01469265666598	2.30454975226879e-12	1.72438900806984e-11	yes	Bm8873	NA
WBGene00229382	1254.92918079417	-1.76039481800491	0.250995872817826	-7.01364049632247	2.32195568527733e-12	1.7349899001218e-11	yes	Bm9121	NA
WBGene00230652	1694.35300987268	1.98891107467027	0.283577486316585	7.01364237515615	2.32192448902809e-12	1.7349899001218e-11	yes	Bm10391	Bma-cnnm-2
WBGene00225988	385.623343860715	-3.67502485542795	0.524091899393806	-7.01217641348528	2.34639078385014e-12	1.75202628912573e-11	yes	Bm5727	Bma-zipt-16.1
WBGene00230969	6285.63559012926	1.49297294929482	0.213089908930488	7.00630525766401	2.44693744010468e-12	1.82469633459762e-11	yes	Bm10708	Bma-ztf-18.2
WBGene00225564	959.684918937164	-2.04536359407045	0.291932275377877	-7.00629483815358	2.44711958265682e-12	1.82469633459762e-11	yes	Bm5303	Bma-eif-3.D
WBGene00221231	367.558962943556	2.65147791734034	0.37854574686236	7.00437909900602	2.48083541802225e-12	1.84855017413827e-11	yes	Bm970	NA
WBGene00231013	1470.51962197572	1.96061296091279	0.279982028566856	7.00263860130085	2.51186182968376e-12	1.87036827693269e-11	yes	Bm10752	Bma-inx-15
WBGene00223900	519.269867347962	-5.18950399494918	0.741453268529968	-6.99909787334012	2.57615858378756e-12	1.91691244620025e-11	yes	Bm3639	NA
WBGene00224748	528.784270309055	-2.49511117902559	0.356806941987624	-6.99288854955106	2.69283428191388e-12	2.00233999519134e-11	yes	Bm4487a	Bma-ifet-1
WBGene00230481	630.195768040547	-2.76654197802461	0.395673880946443	-6.99197523831269	2.71042727974044e-12	2.01402415412059e-11	yes	Bm10220	Bma-rde-1
WBGene00226254	825.590729323238	-2.19644897424475	0.314183983700984	-6.99096417446652	2.73003474873036e-12	2.02718796484032e-11	yes	Bm5993	NA
WBGene00232349	330.537505156145	-3.73757232523904	0.53473295379541	-6.98960536976565	2.75660516070114e-12	2.04550029757013e-11	yes	Bm12088a	Bma-famh-161
WBGene00268843	1682.37046937366	1.61987202509446	0.231876186306252	6.98593525665029	2.82964551702238e-12	2.09824579341833e-11	yes	Bm17701	NA
WBGene00222060	124.996788338639	-4.30592598554442	0.616526034688061	-6.98417543343982	2.8653383602543e-12	2.12324346681361e-11	yes	Bm1799a	Bma-rnt-1
WBGene00227194	412.145884734445	-2.28014504952329	0.326554411931099	-6.98243528862317	2.90106609407979e-12	2.14823242557464e-11	yes	Bm6933	Bma-snx-6
WBGene00223602	164.882874837485	-4.69662939259532	0.672953473075302	-6.97912943540121	2.97014745171797e-12	2.19786809013522e-11	yes	Bm3341	NA
WBGene00229356	227.875360812284	-3.25243956500721	0.466043491954982	-6.97883270800268	2.97642638512866e-12	2.20099439038327e-11	yes	Bm9095	NA
WBGene00221967	16173.6761014483	1.58385460371489	0.226964493733077	6.97842458819833	2.98508371789702e-12	2.20587393360459e-11	yes	Bm1706a	Bma-mrpl-9
WBGene00232345	183.113822747935	-3.4885635349205	0.500392716234802	-6.97165130853652	3.13242168866195e-12	2.31315633315044e-11	yes	Bm12084	Bma-cutl-14
WBGene00222153	40293.1007948127	1.60524657730199	0.230283977923591	6.9707262822888	3.15308917348212e-12	2.32681477230447e-11	yes	Bm1892	Bma-ahsa-1
WBGene00268594	287.639833539751	-5.54150037139389	0.795103165975302	-6.96953629230804	3.1798733792638e-12	2.34496512448806e-11	yes	Bm17451	NA
WBGene00230076	1245.18304067583	-1.82389926596837	0.261705861050718	-6.9692717566417	3.18585776967727e-12	2.34776244856203e-11	yes	Bm9815a	NA
WBGene00228624	413.862311733942	2.54999184864219	0.365912588736654	6.96885520513594	3.1953034926648e-12	2.35310494322359e-11	yes	Bm8363	NA
WBGene00222291	3551.56801253111	1.66327811902552	0.238749925591112	6.96661209383612	3.24664232862595e-12	2.38927009280406e-11	yes	Bm2030	Bma-atp-5
WBGene00221961	19152.2361947873	1.73745921027777	0.249421552517596	6.96595459670712	3.26184336966046e-12	2.39880931406396e-11	yes	Bm1700a	Bma-rpl-4
WBGene00234511	1659.47805011152	1.9639720447826	0.281977958918134	6.96498425734331	3.28440475990404e-12	2.41374465036843e-11	yes	Bm14250	Bma-nex-1
WBGene00225602	245.563443818669	-3.06742946668044	0.440526461162606	-6.96309923945339	3.32867157804944e-12	2.44460013425632e-11	yes	Bm5341	Bma-suro-1
WBGene00227195	299.731504881758	-3.18742098585024	0.457835385482931	-6.96193672860849	3.35626248568849e-12	2.46317483110632e-11	yes	Bm6934	Bma-gck-3
WBGene00229959	634.924796233566	-2.42691258898355	0.34863401639237	-6.96120422813872	3.37376260615923e-12	2.47432349931527e-11	yes	Bm9698	NA
WBGene00223948	5101.35739606942	1.74482894616503	0.25066877204379	6.96069531094292	3.3859737562052e-12	2.4815806291203e-11	yes	Bm3687	Bma-mrps-21
WBGene00221631	1040.52533679638	2.93777856459172	0.422165322560128	6.9588343892772	3.43099547927038e-12	2.51285827480397e-11	yes	Bm1370	NA
WBGene00228302	286.82816723808	-5.41038203852993	0.77753981619274	-6.95833438475488	3.44319191536524e-12	2.52006839980455e-11	yes	Bm8041a	Bma-air-1.1
WBGene00227549	1849.28594180442	-1.69605084287756	0.243768309800135	-6.95763466657395	3.46033129600522e-12	2.53088394789733e-11	yes	Bm7288a	NA
WBGene00226697	693.427115082555	-2.2101527896876	0.317675319346504	-6.95726943545425	3.46931071863002e-12	2.53572062415557e-11	yes	Bm6436a	Bma-tftc-1
WBGene00226363	2094.35820405511	-1.7334538172892	0.249329402338192	-6.9524644948931	3.58959196885461e-12	2.62184580410888e-11	yes	Bm6102a	Bma-ndc-80
WBGene00233108	649.275953187319	-2.09884702288622	0.301936060756636	-6.95129630302065	3.61944746830392e-12	2.64185147294799e-11	yes	Bm12847	NA
WBGene00225204	380.910747311035	-3.84406082687153	0.553085094898689	-6.95021591130685	3.64727568533527e-12	2.66035118913325e-11	yes	Bm4943a	NA
WBGene00221016	428.618948121972	-3.1515896617579	0.453686562318307	-6.94662333760448	3.74132849270146e-12	2.72689715209074e-11	yes	Bm755	Bma-rpom-1
WBGene00230896	266.531433708364	-3.39746377615323	0.489087356585563	-6.94653773074762	3.74359842344888e-12	2.72689715209074e-11	yes	Bm10635	NA
WBGene00226490	603.823852367687	-2.18596729918148	0.314755753413192	-6.94496375515614	3.78557503481484e-12	2.75425157591266e-11	yes	Bm6229a	Bma-scyl-1
WBGene00230647	506.745674782066	-2.77684638217039	0.399837519573023	-6.94493699624717	3.78629264705492e-12	2.75425157591266e-11	yes	Bm10386a	NA
WBGene00224735	4341.69375319817	1.49664814639101	0.215540961813019	6.94368315795746	3.82006765474333e-12	2.77693520492366e-11	yes	Bm4474	Bma-ucr-1
WBGene00229692	352.228200863374	-3.64400269444618	0.52482522080835	-6.94326901598515	3.8312882794877e-12	2.78320365523463e-11	yes	Bm9431	NA
WBGene00229098	447.258394201088	2.30040498711068	0.331396470048748	6.9415494581831	3.87822403377118e-12	2.81539095676546e-11	yes	Bm8837	NA
WBGene00224583	245.266425725526	-3.27299178722022	0.471572437412937	-6.94059178940984	3.90460776436824e-12	2.83262506399497e-11	yes	Bm4322	NA
WBGene00226081	4527.0343309601	2.24865233187604	0.324003594219287	6.94020798532915	3.91523087303772e-12	2.83840993265218e-11	yes	Bm5820	Bma-pat-12
WBGene00224777	1079.78654123249	1.73409282101684	0.249966801060655	6.93729252708265	3.99685671577268e-12	2.89562675520651e-11	yes	Bm4516	Bma-let-607
WBGene00223732	3660.22315041033	2.62862477492036	0.379057829453472	6.93462730663109	4.07293481978872e-12	2.9487497698673e-11	yes	Bm3471	Bma-bbs-2.1
WBGene00223568	18763.87443982	1.58412582852875	0.228490140608952	6.93301612186363	4.11961234834649e-12	2.9805297982804e-11	yes	Bm3307	NA
WBGene00234002	8023.3399615021	1.47620746913488	0.212952155246306	6.93210861109839	4.1461342546704e-12	2.99769423338687e-11	yes	Bm13741	Bma-dars-1
WBGene00222539	3596.13105002183	1.66637498767762	0.240446715646347	6.93032958756883	4.19861264647301e-12	3.03358964982861e-11	yes	Bm2278	Bma-eif-3.L
WBGene00227860	352.309163501379	-2.95390567544476	0.426277902915698	-6.92953037265207	4.2223996857218e-12	3.04666751734068e-11	yes	Bm7599a	Bma-pdp-1
WBGene00225973	765.186784302686	-2.40178644074421	0.346597071177115	-6.92962128210504	4.21968730182308e-12	3.04666751734068e-11	yes	Bm5712a	NA
WBGene00227063	2677.67648040371	1.49506663694152	0.215758608227288	6.92934872552834	4.2278244488806e-12	3.0485288674129e-11	yes	Bm6802	NA
WBGene00227886	391.15832543014	-2.49605483734399	0.36022163324646	-6.92921969968475	4.23168186434164e-12	3.04925831717691e-11	yes	Bm7625	NA
WBGene00221973	453.444840958553	-2.22899431740841	0.321724763063354	-6.9282646949047	4.26034060263374e-12	3.06784607239385e-11	yes	Bm1712a	Bma-pmk-1
WBGene00225532	334.861724377987	-3.35851177794103	0.484788638905326	-6.927785654228	4.27478770747971e-12	3.07618202052687e-11	yes	Bm5271	Bma-unc-7
WBGene00226519	310.050443227366	2.68224296670133	0.387206285873115	6.92716793234157	4.29348813161932e-12	3.08756545840946e-11	yes	Bm6258a	Bma-zmp-4
WBGene00229987	441.147531360766	-3.48870615980295	0.503674720248026	-6.92650637317077	4.31360458989368e-12	3.0999512528981e-11	yes	Bm9726a	Bma-gld-3
WBGene00228957	881.336469891937	-2.06339803295405	0.297952996042141	-6.92524680188889	4.35216094830828e-12	3.12556330838627e-11	yes	Bm8696	Bma-ifta-1
WBGene00229285	428.188974870572	2.28349511993281	0.329915119898971	6.92146246777679	4.47004576430965e-12	3.20807370157923e-11	yes	Bm9024	NA
WBGene00223647	4273.05094918585	1.73264244716321	0.25035945987415	6.92061904924292	4.49674237455421e-12	3.22507326260699e-11	yes	Bm3386	Bma-nstp-2
WBGene00227359	1165.00868636453	1.94011897526619	0.280370888739815	6.91983031471795	4.52184947441551e-12	3.2409108440376e-11	yes	Bm7098a	Bma-sfrp-1
WBGene00223564	287.622155949208	-3.96081934537548	0.57272955999468	-6.91568869854084	4.65595822572901e-12	3.33479895646299e-11	yes	Bm3303	Bma-nhr-25.2
WBGene00223845	239.807080047618	-2.83610107728772	0.410261876310681	-6.91290427175839	4.74830390977498e-12	3.39866909774475e-11	yes	Bm3584a	NA
WBGene00224509	295.612121960634	-4.18967066257608	0.606565148242947	-6.90720638123111	4.94290596240146e-12	3.53559662130385e-11	yes	Bm4248a	NA
WBGene00229537	236.936174358968	-3.52502453236599	0.510422806189603	-6.90608744284159	4.98202959838184e-12	3.56120394574126e-11	yes	Bm9276	NA
WBGene00227718	4421.92156177199	1.8985439533613	0.274926298722498	6.90564693950081	4.99751491190605e-12	3.56989148540489e-11	yes	Bm7457	NA
WBGene00224306	320.843222728131	-2.98740243058604	0.432625013881167	-6.90529288583072	5.00999539264349e-12	3.57373684738731e-11	yes	Bm4045	NA
WBGene00226090	5355.08551387275	1.48507080399565	0.215065247289985	6.90521050104036	5.01290385592453e-12	3.57373684738731e-11	yes	Bm5829a	Bma-ngp-1
WBGene00220507	447.032981231391	-5.00956630265731	0.725457256303294	-6.90539140539376	5.00651948871941e-12	3.57373684738731e-11	yes	Bm246	NA
WBGene00224566	3245.57713030867	1.56117629790275	0.226123484419075	6.90408739239758	5.05271887051052e-12	3.59972624318619e-11	yes	Bm4305a	NA
WBGene00223433	13939.5981593539	1.40785360432152	0.203934107540509	6.90347299576588	5.07463067334115e-12	3.61293472856149e-11	yes	Bm3172a	NA
WBGene00234202	13450.8976858346	1.64433142050855	0.238223044609728	6.90248679846402	5.10999724542915e-12	3.63569857136609e-11	yes	Bm13941a	Bma-rpl-2
WBGene00226934	532.056017849286	-3.44158590181896	0.498929689027852	-6.89793768040699	5.27628817826334e-12	3.75152142203661e-11	yes	Bm6673	Bma-smg-2
WBGene00225372	2948.63147391968	1.47719705304414	0.214180603110756	6.89696934077763	5.31236413846456e-12	3.77466722437982e-11	yes	Bm5111	NA
WBGene00228888	587.401822379086	2.40166827567001	0.348251275105353	6.89636606482906	5.33496159160798e-12	3.78821162717558e-11	yes	Bm8627a	NA
WBGene00225506	251.346722663428	-3.80779488419429	0.552420601701525	-6.8929270060997	5.46559239900814e-12	3.87839884472664e-11	yes	Bm5245	NA
WBGene00225454	639.591974428662	2.11478085057349	0.306821967407812	6.89253402694806	5.48071763124154e-12	3.88655787020206e-11	yes	Bm5193a	Bma-mdl-1
WBGene00229705	150.566005739473	-6.1597121115511	0.893827301168406	-6.89138953744102	5.52500158481764e-12	3.91536984003446e-11	yes	Bm9444	NA
WBGene00223947	1520.26484443927	1.60815304007391	0.233390615548674	6.89039289901749	5.56385024375111e-12	3.94029447202863e-11	yes	Bm3686	Bma-psr-1
WBGene00222031	9761.57237889725	1.37533748512714	0.199651010146127	6.88870787140276	5.63014196076573e-12	3.98460839561459e-11	yes	Bm1770a	Bma-unc-44
WBGene00230123	6324.50867086589	-12.0308470760102	1.74678361639087	-6.88742839303007	5.68099521452706e-12	4.01794480024142e-11	yes	Bm9862	NA
WBGene00234294	338.434839938027	-2.41760274586136	0.351128974012119	-6.88522715239648	5.76953970692586e-12	4.07787717412339e-11	yes	Bm14033a	Bma-did-2
WBGene00221080	119.038590617132	-6.24328766864839	0.906980911292769	-6.88359323874799	5.83613681817675e-12	4.12222847770361e-11	yes	Bm819	NA
WBGene00224074	280.540523812262	-3.50381073921522	0.509493493347204	-6.87704707708109	6.1105921810503e-12	4.31324079182832e-11	yes	Bm3813	Bma-evl-18
WBGene00227892	402.646885782825	-2.34859225011602	0.341543059564322	-6.8764162653808	6.13769840631302e-12	4.32952195020698e-11	yes	Bm7631a	NA
WBGene00223712	822.995925979061	-2.39718033211323	0.348964658824145	-6.86940717776595	6.44692495588537e-12	4.54465795409946e-11	yes	Bm3451	Bma-ints-9
WBGene00224156	4267.77596278142	1.75435883960104	0.255445016004283	6.86785307869005	6.5175292168652e-12	4.59140864948787e-11	yes	Bm3895a	Bma-rps-21
WBGene00223005	143.244321542676	-5.00753151428289	0.72962518728233	-6.86315604445439	6.73555798679479e-12	4.74188592828556e-11	yes	Bm2744a	NA
WBGene00233423	5467.35181872313	1.7501099506083	0.25501876096198	6.86267137369246	6.75845834300452e-12	4.74864794395367e-11	yes	Bm13162	NA
WBGene00223866	323.343163879386	-3.11967750272293	0.454583643550155	-6.86271392951853	6.75644455799406e-12	4.74864794395367e-11	yes	Bm3605a	NA
WBGene00225518	1099.82601450565	-2.57852268770405	0.375726628257225	-6.8627626944204	6.7541376761775e-12	4.74864794395367e-11	yes	Bm5257	NA
WBGene00234194	10014.8038703409	1.61203041338841	0.23493047769263	6.86173385939946	6.80297198930284e-12	4.77679193088991e-11	yes	Bm13933a	Bma-nath-10
WBGene00225438	1625.96274895429	1.88629306641526	0.274988579739799	6.85953237839954	6.90863194641211e-12	4.84780558649677e-11	yes	Bm5177a	Bma-gtf-2H1
WBGene00233228	4938.3161013973	1.56246017495628	0.228038218846684	6.85174696969004	7.29535142443284e-12	5.11581744193703e-11	yes	Bm12967a	NA
WBGene00227679	5443.23797137561	1.45985906889868	0.213226724002497	6.84651080078306	7.56729349660302e-12	5.30192081733115e-11	yes	Bm7418	Bma-rpn-12.2
WBGene00225629	416.044272288658	-2.47919756507157	0.362114446300853	-6.84644755379849	7.57063821793435e-12	5.30192081733115e-11	yes	Bm5368	Bma-suco-1.1
WBGene00230326	201.974224080664	-2.95682150715786	0.431929066826114	-6.84561826062106	7.6146283905748e-12	5.32924514728994e-11	yes	Bm10065a	NA
WBGene00228679	666.334743898599	-3.75125723684316	0.548023803262096	-6.84506259493457	7.64424392745775e-12	5.34648000539881e-11	yes	Bm8418	NA
WBGene00222728	4053.47637313589	1.62565190080019	0.237560501367323	6.84310687779936	7.74937901559057e-12	5.4164772441e-11	yes	Bm2467	NA
WBGene00227861	12801.6833271845	2.03320021006038	0.297162763987429	6.84204232986065	7.80720097133791e-12	5.45333496791954e-11	yes	Bm7600a	Bma-anc-1.1
WBGene00231310	314.465145181573	-4.41585842234616	0.645439397432539	-6.84163135983298	7.82963613170282e-12	5.46188484057263e-11	yes	Bm11049	NA
WBGene00230315	347.758526866612	-3.07086332087106	0.448849387228991	-6.84163420569491	7.82948055697532e-12	5.46188484057263e-11	yes	Bm10054	Bma-pax-3.2
WBGene00224242	269.968635875641	-2.94381500752897	0.43030259522127	-6.84126714600734	7.84957162898249e-12	5.47222901786255e-11	yes	Bm3981a	Bma-cutl-28
WBGene00225160	282.791316206927	-4.78259395536148	0.699202263255288	-6.84007218897587	7.91532835520978e-12	5.51132814551127e-11	yes	Bm4899	NA
WBGene00229366	223.542067463357	-3.58570628069016	0.524221385758245	-6.84006104692527	7.91594401861115e-12	5.51132814551127e-11	yes	Bm9105	NA
WBGene00225459	1757.09733937452	1.74055201595074	0.25446836553312	6.83995439788447	7.92183937586874e-12	5.5118512280801e-11	yes	Bm5198	NA
WBGene00228458	1360.93570355977	2.01075164481099	0.294134954715921	6.83615331184625	8.13478862597676e-12	5.65634394077489e-11	yes	Bm8197	NA
WBGene00227705	429.842340473375	2.19237492978795	0.320735684641253	6.8354568411686	8.17441066796577e-12	5.68020819113185e-11	yes	Bm7444	NA
WBGene00233261	216.224485290735	-3.80751310465969	0.557371971425902	-6.83118868521337	8.42138794277483e-12	5.84803446577008e-11	yes	Bm13000	NA
WBGene00224554	711.71248420549	-2.69351196276733	0.394408566691007	-6.82924304957483	8.53638439715648e-12	5.92405173675724e-11	yes	Bm4293	Bma-hum-4
WBGene00228892	404.107443072423	-3.09953258350031	0.454021374485233	-6.82684287059071	8.68036789477381e-12	6.02007391537226e-11	yes	Bm8631	NA
WBGene00226578	1478.91943652351	-1.66832797353652	0.244383329227777	-6.82668485943062	8.68992980729392e-12	6.02280710770727e-11	yes	Bm6317a	Bma-pad-1
WBGene00224730	5112.03017216988	1.6529877760346	0.242140633140595	6.82656088982317	8.69743894779311e-12	6.02411495317409e-11	yes	Bm4469a	Bma-ilcr-2
WBGene00222100	857.725530223876	-2.63414487489762	0.385935259091788	-6.82535428635487	8.77085872865566e-12	6.07104336418252e-11	yes	Bm1839	NA
WBGene00231355	648.939924098077	-2.26075238635622	0.331312035426026	-6.82363495624049	8.87652721491135e-12	6.14021879327147e-11	yes	Bm11094	NA
WBGene00233936	2705.96364053897	1.47174467240478	0.215769140153976	6.82092291490118	9.04574734232493e-12	6.25323759825882e-11	yes	Bm13675	Bma-pas-4
WBGene00224602	4611.80987830808	1.9091762205109	0.279963338224076	6.8193793966796	9.14346358129078e-12	6.31671259016961e-11	yes	Bm4341	NA
WBGene00229930	948.860727356553	-1.7529992845764	0.257148608740344	-6.81706696047689	9.29179629909942e-12	6.41505137531252e-11	yes	Bm9669a	NA
WBGene00233191	218.572575763759	-3.0797649726627	0.451845369806545	-6.81597107873715	9.36291323786224e-12	6.45998810970341e-11	yes	Bm12930	NA
WBGene00224319	249.566817181812	-4.25975050023937	0.625044868126471	-6.81511155032387	9.41906499984349e-12	6.49454835735669e-11	yes	Bm4058a	Bma-insc-1
WBGene00233092	1203.12532382421	2.37746461736585	0.349011549039661	6.81199411282426	9.62550471075712e-12	6.62871280845081e-11	yes	Bm12831a	Bma-ptr-12
WBGene00228455	10115.512007751	1.59885845377494	0.234712512014814	6.81198645973345	9.62601692015816e-12	6.62871280845081e-11	yes	Bm8194	Bma-dph-1
WBGene00234079	2376.74549749503	1.9090179793634	0.280289831934741	6.8108713262487	9.70093718767409e-12	6.67601425600051e-11	yes	Bm13818	Bma-emb-8
WBGene00230088	334.556089233327	-3.47656669792369	0.51055366855874	-6.80940498917149	9.8003231094926e-12	6.7400810088712e-11	yes	Bm9827	NA
WBGene00226398	4257.18775252696	1.5077732307068	0.221475916275698	6.80784283935364	9.90730050264669e-12	6.80928318703395e-11	yes	Bm6137a	Bma-unc-37
WBGene00226108	1103.7831304138	-1.99778034845371	0.293551271434706	-6.8055584930351	1.00657970085437e-11	6.91378300939394e-11	yes	Bm5847a	Bma-rund-1
WBGene00226588	6269.71835291385	1.41914644762509	0.208535494017267	6.80529928160617	1.00839382430648e-11	6.9218064237309e-11	yes	Bm6327	Bma-hsp-60
WBGene00226012	13944.8285326625	1.50039682874882	0.220483997520655	6.80501462972731	1.0103896860418e-11	6.93106625220098e-11	yes	Bm5751	Bma-drp-1
WBGene00268552	684.767798662785	-3.47749205088249	0.511392732109453	-6.80004198835233	1.04588663617318e-11	7.16997780332417e-11	yes	Bm17409	NA
WBGene00230063	255.412984220569	-4.54434655612302	0.668424618160308	-6.79859244058116	1.05646216747077e-11	7.23784662688571e-11	yes	Bm9802	NA
WBGene00228272	346.439686970791	-2.35877563811227	0.346959067022316	-6.79842627649375	1.0576811304409e-11	7.24156761193242e-11	yes	Bm8011	Bma-clh-1
WBGene00220839	629.40857270849	2.12014800800715	0.312016792011052	6.79498046993591	1.08327202633819e-11	7.41204327088995e-11	yes	Bm578a	NA
WBGene00228024	433.189739964528	-2.4493143873421	0.360520358525997	-6.79383099849402	1.09194294494162e-11	7.46660411936788e-11	yes	Bm7763	Bma-pan-1
WBGene00269278	317.051523784567	-3.31142427827524	0.48758288575461	-6.79151047959835	1.10965521700638e-11	7.58287987896901e-11	yes	Bm18138	Bma-hxk-3
WBGene00225875	274.579611828248	-4.00740822124451	0.590200676438345	-6.78990787578865	1.12205171010076e-11	7.66270495457597e-11	yes	Bm5614	Bma-cchl-1
WBGene00226874	178.381646292556	-3.19757243575127	0.471021455842417	-6.78859189128115	1.13233248867651e-11	7.72798892749606e-11	yes	Bm6613	NA
WBGene00227560	1208.11452213496	-2.63690483125434	0.388458355484995	-6.78812746339857	1.13598269075498e-11	7.74796596527026e-11	yes	Bm7299	Bma-dcs-1
WBGene00230764	3717.2943275229	1.74584279358712	0.257239939791233	6.78682631866569	1.14627061719249e-11	7.81316136336991e-11	yes	Bm10503	NA
WBGene00222118	170.772854538972	-6.36678890208946	0.939034075615579	-6.78014682046095	1.20053815394265e-11	8.17785525714909e-11	yes	Bm1857	Bma-agmo-1
WBGene00226554	239.650611125669	-3.44098720724884	0.507588573178111	-6.77908721566395	1.20937508210693e-11	8.23281702971776e-11	yes	Bm6293	NA
WBGene00226764	3128.48804805641	1.68498220786563	0.248571217941774	6.7786697986101	1.21287373729105e-11	8.25139180639592e-11	yes	Bm6503a	Bma-lbp-9
WBGene00223077	4492.22643001894	1.36425812174599	0.201298684931876	6.7772828332569	1.22457018246228e-11	8.32567861997672e-11	yes	Bm2816	Bma-sars-1
WBGene00221860	522.331788633663	-3.08455446277324	0.455219249099525	-6.77597546429514	1.23569649999574e-11	8.39599746192416e-11	yes	Bm1599	NA
WBGene00223417	296.546544092205	-3.1558679022805	0.465809207314874	-6.77502259019802	1.24386822756185e-11	8.4461648024875e-11	yes	Bm3156	Bma-wht-4
WBGene00225211	2772.46440388653	1.80385142937786	0.266376075049267	6.77182224058313	1.27170334032359e-11	8.62970316122055e-11	yes	Bm4950a	NA
WBGene00228556	451.948472762105	-2.95447611067198	0.436417862478709	-6.76983314544352	1.28931001495175e-11	8.74364355076453e-11	yes	Bm8295	Bma-snx-17
WBGene00227672	4359.02889399378	1.44055279366472	0.212802485123507	6.76943595291498	1.2928542942661e-11	8.76213394248025e-11	yes	Bm7411a	Bma-nekl-2
WBGene00235040	145.987885684987	-4.65245671075557	0.687400999342534	-6.76818438612313	1.30408496214559e-11	8.83266142186475e-11	yes	Bm14705a	Bma-cpg-4.1
WBGene00222429	171.67624335552	-3.48720934537643	0.515400636771436	-6.7660167578002	1.32376218950261e-11	8.96027281144692e-11	yes	Bm2168a	Bma-pdfr-1
WBGene00222233	422.683026733414	-3.4711946979908	0.513162288480458	-6.76432149421867	1.33935377867677e-11	9.06008569351108e-11	yes	Bm1972a	NA
WBGene00226069	228.005219317939	-4.04205878342273	0.597590708483123	-6.76392508458301	1.34302548266872e-11	9.07919119671631e-11	yes	Bm5808	Bma-nep-21
WBGene00221349	432.771199806028	2.93874550510644	0.434576451544295	6.76232109370727	1.35798319927895e-11	9.17452079462416e-11	yes	Bm1088	NA
WBGene00230507	975.930201245098	1.72771771391701	0.255643145606973	6.75831816188496	1.39602710202666e-11	9.42560201525878e-11	yes	Bm10246	Bma-heh-1
WBGene00222143	5965.8439811376	1.76314696136375	0.261033635819183	6.75448187292257	1.43346587714134e-11	9.6722839254216e-11	yes	Bm1882a	NA
WBGene00231879	3051.20511398435	1.74772127158962	0.258893382927594	6.7507375114273	1.47095508131582e-11	9.91899540358654e-11	yes	Bm11618	Bma-pmp-4
WBGene00223055	5430.08943585691	1.51718907796273	0.224830194357231	6.74815534586107	1.49736585221084e-11	1.00907390606536e-10	yes	Bm2794a	Bma-gsr-1
WBGene00225733	366.303408550297	-2.51364938642012	0.372546751527526	-6.74720521951564	1.50720030133567e-11	1.0150629307864e-10	yes	Bm5472	Bma-hlh-34
WBGene00225313	559.114590149986	-2.14894947302745	0.318529176409136	-6.74647609130545	1.51479014163754e-11	1.01953369143506e-10	yes	Bm5052a	NA
WBGene00233211	4015.54227496254	-2.09756447909269	0.310950587003997	-6.74565209637545	1.52341255181345e-11	1.02469337681614e-10	yes	Bm12950	NA
WBGene00225156	1165.4537531099	1.70223182259961	0.252412032747972	6.743861630001	1.54231429541288e-11	1.03675644136443e-10	yes	Bm4895a	NA
WBGene00225326	13728.0312581163	1.56329336746908	0.231841354924001	6.74294440688348	1.55208608451037e-11	1.04267099658487e-10	yes	Bm5065	Bma-algn-14.1
WBGene00231128	425.258571104862	-2.96242802145752	0.439356542987512	-6.74265142682016	1.55522015376027e-11	1.04412180122439e-10	yes	Bm10867	Bma-ints-5
WBGene00226774	2120.6507461729	1.93645776811936	0.287274286714559	6.74079741095471	1.57519714136097e-11	1.0568714696107e-10	yes	Bm6513	Bma-mrt-2
WBGene00223484	733.314281573568	-1.80467843078791	0.26775713033689	-6.73998271686463	1.58405472682485e-11	1.06214933654119e-10	yes	Bm3223a	NA
WBGene00227382	8197.11592198546	1.79399537209514	0.266205298358963	6.73914224530585	1.59324368527091e-11	1.06764265714058e-10	yes	Bm7121	NA
WBGene00221543	345.969122900628	2.25682220595364	0.334927250008232	6.73824600983697	1.60309982697054e-11	1.07357591537433e-10	yes	Bm1282	NA
WBGene00225836	2698.7308040052	1.66082358697461	0.246516983639374	6.73715685814248	1.61515791558669e-11	1.08097545693388e-10	yes	Bm5575	NA
WBGene00222154	4889.02947535796	1.63549165118544	0.242789360333093	6.73625750709028	1.62518161775258e-11	1.08700505831579e-10	yes	Bm1893a	Bma-unc-76
WBGene00227138	2230.03189111684	1.76842778776327	0.26261466582902	6.73392623439634	1.65144925875042e-11	1.10388514083037e-10	yes	Bm6877a	NA
WBGene00224648	387.929689383025	-2.51037175906527	0.372824584485749	-6.73338578926579	1.65759784024518e-11	1.10730429290693e-10	yes	Bm4387a	NA
WBGene00234964	212.19277024974	-4.76815105632127	0.70876523292893	-6.72740540138682	1.7271504663883e-11	1.15304780357325e-10	yes	Bm14779	NA
WBGene00268581	204.085231301783	-5.1430511981233	0.764966962425302	-6.72323309469135	1.77735906529468e-11	1.185828292941e-10	yes	Bm17438	NA
WBGene00229305	3221.97393582656	2.43938676566869	0.36285635892503	6.7227339570276	1.78346046401065e-11	1.18915861057088e-10	yes	Bm9044	NA
WBGene00223659	488.409193344739	-2.23097056507526	0.331961859529278	-6.72056292321888	1.81023839115891e-11	1.20626270903406e-10	yes	Bm3398	Bma-him-4.1
WBGene00222047	320.097246501948	-4.63343011981312	0.689577607482922	-6.71922937974443	1.82688132054491e-11	1.21659623055554e-10	yes	Bm1786	NA
WBGene00226448	385.92430751083	-2.94566620103819	0.43840014469356	-6.71912689056524	1.82816659107926e-11	1.21669596418722e-10	yes	Bm6187	Bma-lpr-3
WBGene00227403	16369.6942101898	1.6583727463632	0.246842254279477	6.71835035376712	1.83793359927005e-11	1.22243690354926e-10	yes	Bm7142	NA
WBGene00230979	358.961987308022	-5.38855957840236	0.802172166148799	-6.71746017350945	1.8491928408105e-11	1.2291626109978e-10	yes	Bm10718	NA
WBGene00225468	2140.6358057354	1.52864078032853	0.227612612558572	6.71597572359992	1.86811896108053e-11	1.24097301103396e-10	yes	Bm5207a	NA
WBGene00222122	461.558411418919	-2.16266551679781	0.322094152062386	-6.71438926459902	1.88855532418168e-11	1.25377139396572e-10	yes	Bm1861	NA
WBGene00228233	801.995252138632	-1.75136390028645	0.260927584932237	-6.71206879388119	1.91884184082896e-11	1.27308918417847e-10	yes	Bm7972	Bma-unc-13
WBGene00222975	248.473352772031	-4.39932227126587	0.655472591153044	-6.71167998577486	1.92396282518863e-11	1.27569688563714e-10	yes	Bm2714a	Bma-dyf-7
WBGene00226212	233.972758228062	-4.24537291469904	0.632931852890389	-6.70747236896333	1.98024440545322e-11	1.31220277083681e-10	yes	Bm5951	Bma-rocf-1
WBGene00232475	128.243208631354	-4.24695601722988	0.633250536420874	-6.70659679379609	1.99215722821249e-11	1.31928088382551e-10	yes	Bm12214	NA
WBGene00227433	13271.3921700415	1.6262479706974	0.242537203593861	6.70514851577418	2.01201627699853e-11	1.33160929018155e-10	yes	Bm7172	Bma-cyn-15
WBGene00221972	2322.47382843043	1.56565089152716	0.233548548183819	6.70374919348623	2.03138809003439e-11	1.34360020893324e-10	yes	Bm1711a	Bma-osm-9
WBGene00222350	844.842187856989	2.11531217334027	0.3156420507825	6.70161712641348	2.06125538848407e-11	1.36251397209172e-10	yes	Bm2089	Bma-daf-11
WBGene00227417	617.36976766757	-2.49763963670419	0.372837326544029	-6.69900640007201	2.0984140445836e-11	1.38622111514878e-10	yes	Bm7156	Bma-zyg-8
WBGene00224297	471.729774310947	-2.04189820375186	0.304830629993048	-6.69846794529285	2.10615909191061e-11	1.39048026308208e-10	yes	Bm4036	Bma-dagl-2
WBGene00222616	317.615416626398	-2.59465413612315	0.387366645958104	-6.69818675199975	2.11021484832826e-11	1.39230000614762e-10	yes	Bm2355a	Bma-sup-46
WBGene00227557	402.262492800405	-2.21721761574412	0.331039247075637	-6.69774848550669	2.11655138142305e-11	1.39562141858141e-10	yes	Bm7296	Bma-sas-1
WBGene00227598	233.355075938376	-3.05154441948242	0.455775400796748	-6.69528108394611	2.15257469247361e-11	1.41850171155318e-10	yes	Bm7337a	NA
WBGene00226864	1008.69194133461	-2.7482679556931	0.410490393175376	-6.69508471180943	2.15546731621521e-11	1.41953486743983e-10	yes	Bm6603	Bma-mcm-10
WBGene00227119	2969.63768817312	1.4847080287088	0.221770273695451	6.69480180534788	2.15964130965976e-11	1.4214101125924e-10	yes	Bm6858a	Bma-mrps-25.1
WBGene00229230	275.066752149973	-5.75663016358607	0.859911382316105	-6.69444582543032	2.16490467134239e-11	1.42399960426235e-10	yes	Bm8969a	NA
WBGene00225325	867.34805500237	1.69854113901805	0.2537841826006	6.69285659024373	2.18855599116535e-11	1.43867346290409e-10	yes	Bm5064	NA
WBGene00224731	6881.02631389673	1.42828138791097	0.213529972650815	6.68890353040335	2.24848886096792e-11	1.47716481577384e-10	yes	Bm4470	Bma-mrps-16
WBGene00227129	2955.17038668553	-2.3539871133986	0.352058192827401	-6.68635799807294	2.28792937848411e-11	1.50215461338586e-10	yes	Bm6868a	Bma-ntl-3
WBGene00227768	593.347856769052	-2.20198149310252	0.329357488060391	-6.68568826556864	2.29841826147818e-11	1.50735480155867e-10	yes	Bm7507	Bma-panl-3
WBGene00229000	2896.47163499147	1.42897089943789	0.213736294517511	6.68567265406959	2.29866331847585e-11	1.50735480155867e-10	yes	Bm8739a	NA
WBGene00223791	878.791126106957	-1.71035486559183	0.255901081532017	-6.68365626027196	2.33053102893012e-11	1.52731742966277e-10	yes	Bm3530	NA
WBGene00225494	2031.71723964804	1.62825778763883	0.243768935027381	6.67951307026032	2.39737459749461e-11	1.57016313032731e-10	yes	Bm5233	Bma-plc-4.2
WBGene00222911	753.310572580094	1.84434231342174	0.276251879345517	6.67630684645936	2.45038650168129e-11	1.60390295452138e-10	yes	Bm2650	NA
WBGene00229593	293.192619576095	-3.48275007941142	0.521751615855858	-6.67511124752048	2.4704469250802e-11	1.61604632492273e-10	yes	Bm9332	NA
WBGene00224568	433.060076654604	-3.24415434117341	0.486044946915043	-6.67459740454923	2.47911778048851e-11	1.62072892116744e-10	yes	Bm4307a	NA
WBGene00226345	6082.62972969465	-2.64264943484174	0.395937411900895	-6.67441205455777	2.48225277882896e-11	1.62178893446051e-10	yes	Bm6084	Bma-npa-1
WBGene00224258	3801.78717850239	1.62015544053229	0.242775476097747	6.67347240575476	2.49820574436662e-11	1.63121721821379e-10	yes	Bm3997	Bma-vps-60
WBGene00223556	7771.10411879234	1.45636580978371	0.21843382577952	6.6673089874538	2.6053620996935e-11	1.70014950659049e-10	yes	Bm3295a	Bma-repo-1
WBGene00223608	1182.61188300098	-2.09264894344194	0.313898252227978	-6.66664732469453	2.6171296682023e-11	1.70678906845938e-10	yes	Bm3347a	NA
WBGene00228964	222.033946309689	-4.49963067659963	0.674963390662967	-6.66648108452218	2.62009439195394e-11	1.70768317577776e-10	yes	Bm8703a	NA
WBGene00220589	999.616203149328	1.8183378318237	0.272764762456247	6.66632234842052	2.62292835641098e-11	1.70849102364399e-10	yes	Bm328	NA
WBGene00224716	1885.30967734706	1.90958120270968	0.286721069281381	6.66006585248766	2.73704919951212e-11	1.7817425378355e-10	yes	Bm4455	NA
WBGene00220556	832.55425402486	-2.99402138267776	0.449578670054724	-6.65961617421334	2.7454361834773e-11	1.78611710418696e-10	yes	Bm295a	NA
WBGene00227369	285.128805923807	-5.4911255606461	0.824761653209562	-6.65783325313122	2.77893788002872e-11	1.80681549663275e-10	yes	Bm7108a	NA
WBGene00225641	153.99655148854	-7.97813187159274	1.19866992204949	-6.65582052643123	2.81723865886006e-11	1.83060716978081e-10	yes	Bm5380	Bma-nhr-2.2
WBGene00224418	272.862157613851	2.47713477223077	0.372298886608868	6.65361853427516	2.85973295581226e-11	1.8570932497896e-10	yes	Bm4157a	NA
WBGene00230382	249.135756547807	-3.50071532901098	0.526286471540324	-6.65172965355761	2.89668419714837e-11	1.87994979845214e-10	yes	Bm10121	NA
WBGene00227106	685.026999573768	-3.35448663550334	0.504318840950335	-6.65151956088368	2.90082290344782e-11	1.88149621128592e-10	yes	Bm6845	Bma-daf-2
WBGene00225519	1195.1560988166	1.76568819321198	0.265464313486586	6.65132036024574	2.90475238801765e-11	1.88290513234175e-10	yes	Bm5258	NA
WBGene00224752	2516.76604908543	2.04640577103642	0.307741935143261	6.64974622351605	2.93598802375933e-11	1.90085266915899e-10	yes	Bm4491	Bma-pept-3
WBGene00226696	7087.07225506665	1.43452248745295	0.215724907924537	6.6497767979336	2.93537821571351e-11	1.90085266915899e-10	yes	Bm6435a	Bma-trap-3
WBGene00220528	2620.67566220937	-2.04894909129886	0.30816126999216	-6.6489506982853	2.95189846567129e-11	1.90999952051135e-10	yes	Bm267a	NA
WBGene00234657	374.964967029734	2.4078632304593	0.362327326198741	6.64554687530953	3.02093297439549e-11	1.95348803987011e-10	yes	NA	NA
WBGene00229114	4790.94741422903	-1.37172666736431	0.20644611504603	-6.64447798912792	3.0429357534734e-11	1.96652934852035e-10	yes	Bm8853a	NA
WBGene00227437	561.382953341091	-2.0276224809938	0.305211417998369	-6.64333757331657	3.06658389780576e-11	1.98061762899269e-10	yes	Bm7176	NA
WBGene00268461	398.600592815455	-2.58660467409567	0.389546053989072	-6.6400484553958	3.1358004809465e-11	2.02410253935794e-10	yes	Bm17318	NA
WBGene00221850	371.760244042253	-3.442489307901	0.518466157027705	-6.63975702413504	3.14200662335623e-11	2.02688747557267e-10	yes	Bm1589a	NA
WBGene00221571	91.0931559755318	4.32562056747288	0.651499023184085	6.63948895323309	3.1477259112836e-11	2.02935518287628e-10	yes	Bm1310	NA
WBGene00225046	13788.6534789142	1.35600710184344	0.204303244732611	6.63722743913424	3.19638256770376e-11	2.05948522026132e-10	yes	Bm4785	Bma-mys-2.2
WBGene00224979	605.475244224294	2.7505187116067	0.414681515485053	6.63284619375767	3.29274874858323e-11	2.12030065150657e-10	yes	Bm4718	NA
WBGene00222652	1984.45018393285	2.16636661465892	0.326656054291448	6.63194998592021	3.31280841125553e-11	2.13193646406024e-10	yes	Bm2391	NA
WBGene00226528	2858.51173453409	1.49287223756447	0.225138978270325	6.63089194520538	3.33664432630946e-11	2.14598703219723e-10	yes	Bm6267	Bma-lec-1
WBGene00233236	572.176667884341	3.79472537851917	0.572481497282647	6.62855550184817	3.38987665827281e-11	2.1789159204195e-10	yes	Bm12975	Bma-cpl-1.3
WBGene00230160	616.253330612069	-2.01690537077665	0.304375314711416	-6.62637629693759	3.44027514403148e-11	2.2099849021761e-10	yes	Bm9899	NA
WBGene00229735	45820.8682407988	1.48848459060807	0.224689375055643	6.62463274126538	3.48112574592849e-11	2.23488690039687e-10	yes	Bm9474	NA
WBGene00268955	306.574623929843	3.20962854458369	0.484551095437667	6.62392175934433	3.49791959599644e-11	2.24432386054502e-10	yes	Bm17813a	NA
WBGene00223567	271.26640640369	-2.59115676831172	0.391314444975049	-6.62167421005104	3.55153130727645e-11	2.27735834574908e-10	yes	Bm3306	Bma-unc-122
WBGene00229961	118.524012209416	-5.88775696741061	0.889224381592382	-6.62122754311695	3.56228121418581e-11	2.28288535944982e-10	yes	Bm9700	Bma-wdr-23.3
WBGene00228930	213.302669545767	-5.44614502944831	0.822649721524029	-6.62024782474716	3.5859716761241e-11	2.29669375431379e-10	yes	Bm8669	NA
WBGene00225168	5600.18481806324	1.34436008118388	0.203123713819928	6.61842999963894	3.63033741564807e-11	2.32371955846291e-10	yes	Bm4907a	NA
WBGene00226392	1275.25158011183	-1.96126236325545	0.296385259980961	-6.61727362346371	3.65883892037554e-11	2.34056471831785e-10	yes	Bm6131	Bma-clec-78
WBGene00220828	2848.08670106332	2.13567291481398	0.322928680892857	6.61345071273669	3.75463047317572e-11	2.40040963723615e-10	yes	Bm567	NA
WBGene00233968	6674.21222619504	1.32182367639726	0.199949736503476	6.61077978652041	3.82300830261445e-11	2.44266749925544e-10	yes	Bm13707	Bma-cct-8
WBGene00225691	9438.05621751127	1.67797754289976	0.25390373132192	6.60871557169942	3.87668720154215e-11	2.47548887750442e-10	yes	Bm5430a	Bma-rpl-6
WBGene00230265	3379.64223705551	2.01568015071861	0.305026856190218	6.60820550653944	3.89006441789335e-11	2.48255153292003e-10	yes	Bm10004	Bma-pcm-1.3
WBGene00226389	234.99667747886	-2.78167661840274	0.420965791276314	-6.60784480840843	3.89955151606157e-11	2.4871246722976e-10	yes	Bm6128	NA
WBGene00225455	1292.76175668429	-1.98006034032052	0.299691020385075	-6.60700590153262	3.92170412860845e-11	2.49976560012133e-10	yes	Bm5194a	Bma-abts-4
WBGene00225734	1220.0595542284	2.63682386551766	0.399302296718397	6.60357800891199	4.01350945439489e-11	2.5567630085518e-10	yes	Bm5473a	NA
WBGene00223522	975.312633674749	-2.39650849894151	0.363112084186021	-6.59991392000545	4.11396580519948e-11	2.61920045173574e-10	yes	Bm3261a	Bma-mat-3
WBGene00268537	467.03095186871	3.34495764806159	0.506887669863184	6.59901166853089	4.13907739604031e-11	2.63362317687482e-10	yes	Bm17394	NA
WBGene00228427	3050.47747332409	1.83697729129656	0.27844661501649	6.59723333748474	4.18901205363827e-11	2.66381389642338e-10	yes	Bm8166	Bma-feh-1
WBGene00231040	610.430848128689	-5.11809766770838	0.776160070216796	-6.59412647481182	4.27766936313552e-11	2.71857812728334e-10	yes	Bm10779	NA
WBGene00227809	264.939849871334	-3.0344539160988	0.460205916128059	-6.59368732507649	4.29034809670473e-11	2.72501955282698e-10	yes	Bm7548	Bma-egl-9
WBGene00224758	253.835037247672	-3.69749358782447	0.560855287046474	-6.59259825702256	4.32194955195183e-11	2.74346501476089e-10	yes	Bm4497	Bma-che-14
WBGene00229889	2113.14231099192	1.52803389548831	0.23185047378907	6.59060070275492	4.38050554498213e-11	2.77898856805705e-10	yes	Bm9628	NA
WBGene00224111	244.429208695322	-3.64783795910744	0.55368664184006	-6.58827156635859	4.44976208121939e-11	2.82125447930567e-10	yes	Bm3850	Bma-exc-7
WBGene00223218	2393.86613478054	1.71299666973255	0.260016776520881	6.5880236369863	4.45719701003509e-11	2.82429721836345e-10	yes	Bm2957	NA
WBGene00225225	460.17607801701	-4.3458792947921	0.659747438286103	-6.58718631190422	4.48239674216839e-11	2.83858635297484e-10	yes	Bm4964	Bma-dscc-1
WBGene00229947	692.12189330826	2.44124594583729	0.370711760012869	6.58529404557477	4.53986003588056e-11	2.87327822117308e-10	yes	Bm9686	NA
WBGene00303418	674.402665921424	1.94276243940101	0.295108303155101	6.58321849514328	4.60371813000116e-11	2.91197401198126e-10	yes	Bm18574	NA
WBGene00229714	1415.6869697291	1.67481641355691	0.25441332232126	6.58305311324082	4.60884404113346e-11	2.91349639532419e-10	yes	Bm9453a	NA
WBGene00227573	194.743213844656	-6.20913888559557	0.943249728114034	-6.58270943582495	4.61951397785941e-11	2.91851959155445e-10	yes	Bm7312a	NA
WBGene00224021	15515.3226472582	1.54228955844848	0.234349606499284	6.58114848788189	4.66828068405896e-11	2.94759148672315e-10	yes	Bm3760	Bma-fipp-1
WBGene00229946	190.69791161399	2.79493571579703	0.424710072167176	6.58080864796839	4.67896444375702e-11	2.95259740959108e-10	yes	Bm9685	Bma-sup-1
WBGene00228445	27748.2198778062	1.82991419756292	0.278082472522913	6.58047298328787	4.68954042494912e-11	2.95752946752971e-10	yes	Bm8184	Bma-frm-1
WBGene00269212	1035.39955091124	2.09301906418879	0.318169740936833	6.57830960928595	4.75826638771575e-11	2.99910731437495e-10	yes	Bm18072	NA
WBGene00227333	1380.63111695874	1.70999640365429	0.259958832724611	6.57795076909652	4.76976088426275e-11	3.00458482509556e-10	yes	Bm7072	NA
WBGene00231878	188.485946863446	-5.36275388425939	0.815619248501545	-6.57507028446403	4.86301912971186e-11	3.06153055081448e-10	yes	Bm11617	Bma-klp-3
WBGene00224376	267.232123432476	-2.57586592664834	0.391816578561007	-6.57416267608816	4.89277162163817e-11	3.07845260868191e-10	yes	Bm4115	Bma-nas-1
WBGene00227118	717.258782230963	-2.27830953802172	0.346864814857746	-6.56829243103277	5.08955151936582e-11	3.20038406866225e-10	yes	Bm6857a	Bma-dcap-1
WBGene00222462	887.760930351136	-1.95508340822357	0.297714447161216	-6.56697525721642	5.13475748015141e-11	3.22691650438841e-10	yes	Bm2201	NA
WBGene00303386	382.976614671419	-2.59676265945204	0.395470164010361	-6.56626692926451	5.15922976327623e-11	3.24039548144811e-10	yes	Bm18572	NA
WBGene00226411	291.682277604802	-4.93267642493725	0.751302324974851	-6.56550134475142	5.1858085333842e-11	3.25518092766325e-10	yes	Bm6150	Bma-polq-1.1
WBGene00223037	216.907545015608	-3.20626122228468	0.488411996577377	-6.56466516947382	5.21499105002324e-11	3.27158250005849e-10	yes	Bm2776	Bma-pak-2
WBGene00225624	2327.16600448063	1.44015291578992	0.219453216369906	6.56245982452325	5.29273034128365e-11	3.31840875405818e-10	yes	Bm5363a	Bma-ran-5
WBGene00225283	1075.82166341312	-2.09632236544941	0.3195076768638	-6.56110171131517	5.34116719037299e-11	3.3468190903419e-10	yes	Bm5022a	Bma-vab-8
WBGene00223065	273.10609946467	-3.18966329556629	0.486230688574679	-6.55997938944652	5.38152158722257e-11	3.37013464681998e-10	yes	Bm2804	NA
WBGene00227347	3868.39590066906	1.49841267022091	0.228503666675205	6.55749945733148	5.47175097782162e-11	3.42463853547656e-10	yes	Bm7086	Bma-apb-1
WBGene00233238	115.828701077272	-7.61451256787708	1.16128457410043	-6.55697383544041	5.49106431248241e-11	3.43472002967011e-10	yes	Bm12977	NA
WBGene00224044	2248.83592996045	1.74705124660363	0.266635142789324	6.55221674205199	5.66891802748666e-11	3.54390062220067e-10	yes	Bm3783	Bma-sdhd-1
WBGene00221448	164.228861456835	3.59707757888371	0.549105779707832	6.55079169044194	5.72328476371474e-11	3.57580153021595e-10	yes	Bm1187	NA
WBGene00224898	2857.09035982664	1.99167332352093	0.304059996463592	6.55026424615319	5.74353618122111e-11	3.58636306420654e-10	yes	Bm4637a	NA
WBGene00223345	444.42038649663	-2.15300528631794	0.328699547932825	-6.5500707252507	5.7509840501463e-11	3.58892219553393e-10	yes	Bm3084	Bma-pde-3
WBGene00233135	9875.79952197578	1.34090222794747	0.204818657380593	6.54677774523155	5.87917571769956e-11	3.66678508819271e-10	yes	Bm12874a	NA
WBGene00223001	268.472645488428	-4.18465649748112	0.639234616184313	-6.54635464277571	5.89584786664496e-11	3.67504420541598e-10	yes	Bm2740	Bma-aff-1
WBGene00222867	886.317843046821	-2.38361688909173	0.364330927019253	-6.54245004285832	6.05190552654917e-11	3.77012603005665e-10	yes	Bm2606	Bma-vav-1.2
WBGene00229752	213.563933684649	-5.14118438523403	0.786418357044999	-6.5374674169004	6.25692702376476e-11	3.8955823974224e-10	yes	Bm9491	NA
WBGene00225601	560.766338860903	-2.38988273936767	0.365626919779116	-6.53639710339562	6.30184583098171e-11	3.92127050400517e-10	yes	Bm5340	NA
WBGene00224727	1283.13526926653	-1.57585657683292	0.241144778416715	-6.53489819344016	6.36528247214263e-11	3.95844467144563e-10	yes	Bm4466	NA
WBGene00229948	405.305077694664	-2.7417453311216	0.41959713455118	-6.53423273267653	6.39364579731941e-11	3.97377695581656e-10	yes	Bm9687	NA
WBGene00228311	714.201562074457	1.97180455686643	0.301839629278638	6.53262317336797	6.46276061745504e-11	4.01440463861048e-10	yes	Bm8050	Bma-glc-3
WBGene00227832	523.165910236934	-3.11967213387959	0.477767658217082	-6.52968462855248	6.59083209378219e-11	4.09158550897313e-10	yes	Bm7571	Bma-mel-26
WBGene00226010	415.364397960175	2.12325432086755	0.325225146201648	6.52856750366737	6.64016846486818e-11	4.11982658373263e-10	yes	Bm5749	NA
WBGene00222748	484.591129114746	2.15239400381987	0.329704275476344	6.52825627059333	6.65397788173339e-11	4.12600538210493e-10	yes	Bm2487	Bma-rege-1
WBGene00233942	10419.8428381072	1.34002338541378	0.205357987170298	6.52530443971743	6.78635495745313e-11	4.20565606530424e-10	yes	Bm13681	Bma-paa-1
WBGene00230777	315.312068424313	-2.5745066839594	0.394550545299169	-6.52516316257343	6.79275480946883e-11	4.20718888921726e-10	yes	Bm10516	NA
WBGene00224624	401.281040004782	-2.73818415950047	0.419682262986193	-6.52442192819228	6.82642956093895e-11	4.22379559218846e-10	yes	Bm4363	Bma-ept-1
WBGene00229791	2676.59724350691	1.51506231003033	0.232214828495239	6.52439949613896	6.82745120454542e-11	4.22379559218846e-10	yes	Bm9530a	NA
WBGene00224400	450.915781361465	-2.1682547636468	0.332361327657403	-6.52378776715512	6.85536945267055e-11	4.23861994722244e-10	yes	Bm4139	NA
WBGene00224678	306.570262880962	-3.88483421367727	0.595564722980514	-6.52294211489819	6.89414748013986e-11	4.26013784600338e-10	yes	Bm4417a	Bma-bnc-1
WBGene00231077	406.219465518998	2.09151594414972	0.320691348670441	6.52189699791081	6.94236859317046e-11	4.28746279399548e-10	yes	Bm10816a	NA
WBGene00234032	9481.86576267691	1.82394091520856	0.279821781736334	6.51822350601422	7.11449305773747e-11	4.39123232221527e-10	yes	Bm13771	Bma-rpl-20
WBGene00268980	317.181279912686	3.38784117434716	0.519884165911402	6.51653078990774	7.19520459904799e-11	4.43849264702356e-10	yes	Bm17838	NA
WBGene00227422	1036.69271805643	1.61809795731405	0.248345700962176	6.51550621188524	7.24449250689982e-11	4.46632550123312e-10	yes	Bm7161	NA
WBGene00222491	651.791461694898	-2.79900093696474	0.429672366750293	-6.51426797151094	7.30449953725584e-11	4.50073102597449e-10	yes	Bm2230	NA
WBGene00234141	6204.24518450848	1.65846049792014	0.254741403331716	6.51036885339188	7.49664942901748e-11	4.61647118574266e-10	yes	Bm13880	Bma-tpi-1
WBGene00230947	2449.5374228195	1.70409784495983	0.261887577889785	6.50698234215981	7.66754209470491e-11	4.71899560854469e-10	yes	Bm10686a	NA
WBGene00222697	17544.1565452847	1.71426504998404	0.263464059397335	6.50663720093496	7.6851712939542e-11	4.7271303337956e-10	yes	Bm2436	Bma-tmem-131
WBGene00234226	18377.1794531353	1.46830256298367	0.225674393531895	6.50628784242706	7.70305626880768e-11	4.73541296157627e-10	yes	Bm13965	Bma-enol-1.2
WBGene00230058	636.506513263292	1.94442922978466	0.298897783221793	6.50533171850866	7.75221222592361e-11	4.76289873857634e-10	yes	Bm9797a	NA
WBGene00229902	3419.16933640441	1.38779042623414	0.213386941393201	6.50363333938464	7.84028623648326e-11	4.81425025925032e-10	yes	Bm9641a	NA
WBGene00223003	344.621480622642	-2.83063218989831	0.435525088049119	-6.49935507177733	8.06650688742088e-11	4.9503219529619e-10	yes	Bm2742	Bma-adal-1.1
WBGene00221531	255.348962053541	2.59549112402427	0.399534925272533	6.49628095029195	8.23298446214326e-11	5.04959522105695e-10	yes	Bm1270	NA
WBGene00235396	206.728279001422	-4.27651141698114	0.65840988768286	-6.4952114131084	8.29168878817192e-11	5.08269138245206e-10	yes	NA	NA
WBGene00222290	539.739603081914	2.32052190296803	0.357312000108492	6.4943855853244	8.3372963278506e-11	5.10772613795993e-10	yes	Bm2029a	Bma-npr-17
WBGene00223884	8612.32228698475	1.40215657911941	0.21592632913968	6.49368043585074	8.37643330286722e-11	5.1287704480127e-10	yes	Bm3623a	NA
WBGene00226558	395.744574472342	-3.76398874436295	0.579755238995103	-6.49237555987786	8.44933043483082e-11	5.17044977779624e-10	yes	Bm6297	NA
WBGene00234159	7437.71175110665	1.88517380011867	0.29048895615244	6.48965738693825	8.60317916460134e-11	5.2585889759671e-10	yes	Bm13898	NA
WBGene00226211	1666.23922742398	2.03808473597925	0.314050823000048	6.48966532394326	8.60272596691766e-11	5.2585889759671e-10	yes	Bm5950a	NA
WBGene00222757	660.416027993819	-2.06956641168805	0.319072568758833	-6.48619346921142	8.80321114864353e-11	5.37778833852426e-10	yes	Bm2496	NA
WBGene00230016	301.684908551182	-4.8171911578299	0.742721504633541	-6.48586465825668	8.82243373669349e-11	5.38646025576471e-10	yes	Bm9755	NA
WBGene00234181	893.966535713648	-1.79096819180286	0.276239162255962	-6.48339713014099	8.96800315203735e-11	5.47221832426425e-10	yes	Bm13920	Bma-kars-1
WBGene00226687	5923.57745499206	1.69821323903918	0.262109387504293	6.47902486518674	9.23172910459123e-11	5.62993610447894e-10	yes	Bm6426	NA
WBGene00227767	2539.79600092414	1.56836601029171	0.242077497681371	6.47877652947336	9.24693364185351e-11	5.63600079479297e-10	yes	Bm7506a	Bma-riok-3
WBGene00269133	777.998550235673	2.53859929089691	0.39199214812398	6.47614831839438	9.40935600920512e-11	5.73173676171875e-10	yes	Bm17991	NA
WBGene00226834	1486.3426940159	-1.64087270251669	0.253433335454389	-6.4745732820614	9.50802576708374e-11	5.78855091444899e-10	yes	Bm6573a	NA
WBGene00222889	303.38823102533	2.45623800764118	0.379510673948035	6.47211837835556	9.66383608546465e-11	5.88006835069584e-10	yes	Bm2628	NA
WBGene00225584	374.046185615157	-2.56415555709033	0.396281019775374	-6.47054849748742	9.76478053611127e-11	5.93811710808355e-10	yes	Bm5323	Bma-sao-1
WBGene00222099	3509.49268269736	1.71565609695747	0.265243873139729	6.46822140187069	9.9163136308768e-11	6.02684631621355e-10	yes	Bm1838a	NA
WBGene00227668	377.68000206367	-2.29499324896069	0.354883458873264	-6.46689269837252	1.00038631204688e-10	6.07660959953646e-10	yes	Bm7407a	NA
WBGene00224982	303.26786699425	-3.62783455495681	0.561060489446059	-6.46603106652298	1.00610402569163e-10	6.1078779803319e-10	yes	Bm4721a	Bma-fozi-1.2
WBGene00226980	5234.7058960358	-2.50060764285914	0.386816259759812	-6.46458772030901	1.0157536069363e-10	6.16296709984283e-10	yes	Bm6719a	Bma-slo-1
WBGene00224562	489.474826919817	1.89731148860115	0.293499316265295	6.46444943294575	1.01668287129275e-10	6.16511429875599e-10	yes	Bm4301	Bma-swan-2
WBGene00223649	670.114713710752	-2.79667824598691	0.432769027316891	-6.46228835581402	1.03131332971522e-10	6.25029543433175e-10	yes	Bm3388	Bma-sem-4
WBGene00229091	855.957171426409	-2.20400826120583	0.341095365984132	-6.46156025851246	1.03628873592789e-10	6.27689870292107e-10	yes	Bm8830a	NA
WBGene00228343	324.098964273934	-2.63383184691858	0.407643192584004	-6.46112064382338	1.03930416776697e-10	6.29160686871363e-10	yes	Bm8082a	NA
WBGene00223582	428.500094063595	-3.08924455350499	0.478275744252884	-6.4591286316029	1.05307573936922e-10	6.37137580312887e-10	yes	Bm3321a	Bma-exp-2
WBGene00233613	215.836140253891	-3.45212799847589	0.534781246176637	-6.45521514293278	1.08065269201114e-10	6.53453363143307e-10	yes	Bm13352	NA
WBGene00223242	3106.49121282637	-1.3735734087136	0.21283852319979	-6.45359396439826	1.09228223109243e-10	6.60113034752139e-10	yes	Bm2981a	NA
WBGene00222368	1429.20399573567	-3.467180140231	0.537307517939372	-6.45287851829801	1.09745331560272e-10	6.62864277152375e-10	yes	Bm2107	Bma-cks-1
WBGene00222191	3468.05917501697	1.67057158239883	0.258915100131292	6.45219835209187	1.10239159090851e-10	6.65471881497729e-10	yes	Bm1930a	Bma-lmp-1
WBGene00223546	1202.0454140449	-1.98794561048984	0.308140668808053	-6.45142239153174	1.10805189985524e-10	6.68512168184062e-10	yes	Bm3285	NA
WBGene00225501	5315.01907904908	1.61449523261458	0.250411159700523	6.4473773235403	1.13802218367782e-10	6.86207523810232e-10	yes	Bm5240a	Bma-mes-2
WBGene00225928	8142.87079360865	1.83021586904326	0.28388254305821	6.44708846597859	1.14019241148057e-10	6.87129453825328e-10	yes	Bm5667	Bma-ptr-15
WBGene00233874	2612.68636130934	1.6530857501113	0.256437188700373	6.4463573262878	1.14570366275502e-10	6.9006266140641e-10	yes	Bm13613	Bma-sec-6.1
WBGene00227015	256.449592684948	-3.79907099026702	0.589487938797741	-6.44469672783333	1.15831798632699e-10	6.97268383342342e-10	yes	Bm6754	Bma-nsun-5
WBGene00230397	181.731111819208	-3.1868938911831	0.494651544506214	-6.4427048223703	1.17362816892742e-10	7.05918173128699e-10	yes	Bm10136	NA
WBGene00227812	1638.40525717432	1.60164984292531	0.248600857910334	6.44265613718435	1.17400483855842e-10	7.05918173128699e-10	yes	Bm7551	Bma-ipmk-1
WBGene00225868	1942.89777535135	1.79655022551444	0.278881365787903	6.44198733192079	1.17919125673405e-10	7.08639053051336e-10	yes	Bm5607	NA
WBGene00232859	865.564445209737	-3.18252802730248	0.494116847712635	-6.44084095095125	1.18813329646504e-10	7.13612571279312e-10	yes	Bm12598a	Bma-icp-1
WBGene00226826	3865.24143632247	3.01583193687488	0.468391816918224	6.43869475926692	1.2050526355553e-10	7.2336913109104e-10	yes	Bm6565a	NA
WBGene00225340	799.732468659979	-1.94295606660869	0.301896749354238	-6.43582970258774	1.22800656240678e-10	7.36735180077752e-10	yes	Bm5079	Bma-chl-1
WBGene00227729	2053.69355033573	1.64958884349837	0.256428459338002	6.43293980612356	1.25159226552687e-10	7.50465088143281e-10	yes	Bm7468	NA
WBGene00234345	4052.46642535822	1.59729734969075	0.248322035017274	6.4323625149884	1.25635656775074e-10	7.52900482295813e-10	yes	Bm14084	Bma-rps-29
WBGene00226693	188.590109148527	-3.97863082169162	0.618710839415452	-6.43051740527217	1.27170316949866e-10	7.61671294643832e-10	yes	Bm6432	Bma-nsy-4
WBGene00228413	254.826696075877	-6.05692717769464	0.941970592352489	-6.43005973527049	1.27553808540268e-10	7.63541373468696e-10	yes	Bm8152	NA
WBGene00222356	14579.154630334	1.60657693986395	0.250023166702148	6.42571230920319	1.31253431228645e-10	7.85248752437147e-10	yes	Bm2095	Bma-rpl-19
WBGene00224769	788.159278367901	2.46342503183155	0.383415341182019	6.42495165748228	1.31911431603309e-10	7.8874497189144e-10	yes	Bm4508	Bma-dmsr-1
WBGene00220744	1694.63523930614	3.40889384777651	0.530609915106465	6.42448199840466	1.32319318025877e-10	7.90742606049792e-10	yes	Bm483	NA
WBGene00223598	2006.30613450409	1.86391590131884	0.290148548258951	6.42400560851795	1.3273430919909e-10	7.92780447641162e-10	yes	Bm3337	NA
WBGene00225470	639.356516814806	1.80147421597929	0.280457803413446	6.42333425582597	1.33321295899106e-10	7.95842721759846e-10	yes	Bm5209	Bma-arrd-26
WBGene00224879	806.270650716414	1.90700478653009	0.296901037520511	6.42303173628469	1.33586627564788e-10	7.96982580376781e-10	yes	Bm4618	NA
WBGene00226936	116.652066902393	-4.35177350890843	0.677586402665486	-6.42246286494157	1.34086967571796e-10	7.99522458281466e-10	yes	Bm6675	NA
WBGene00225397	2649.76053371326	1.95294493687299	0.304192782822487	6.42008965088641	1.36194114179026e-10	8.11635113141415e-10	yes	Bm5136a	Bma-dab-1
WBGene00229900	1203.07096407108	1.82463579494086	0.28423100366002	6.41955230585394	1.36675690477037e-10	8.14052264292081e-10	yes	Bm9639a	NA
WBGene00231002	481.602542454722	-2.859679160838	0.445497509286367	-6.41906879663336	1.37110440534105e-10	8.16187983512739e-10	yes	Bm10741	NA
WBGene00226975	115.58041549061	-3.91116484794227	0.609339040259601	-6.418700574767	1.37442435584877e-10	8.17709992943894e-10	yes	Bm6714	Bma-oig-3
WBGene00225176	566.950304720766	-2.57771992834247	0.401679973063196	-6.41734739395862	1.38669248393895e-10	8.24551052464254e-10	yes	Bm4915a	Bma-cyk-4.2
WBGene00269348	1112.06926188214	-2.60031512358263	0.405258725893213	-6.41643216404877	1.39505068971458e-10	8.29060906283513e-10	yes	Bm18201	NA
WBGene00222931	1386.46743887106	3.4485967566709	0.537556784416044	6.41531621708981	1.40530854910685e-10	8.34694074483362e-10	yes	Bm2670	Bma-lon-2
WBGene00229104	236.334088208768	-4.91575501834367	0.766596230792575	-6.41244350140012	1.43205505302403e-10	8.50109135354708e-10	yes	Bm8843	NA
WBGene00233953	1223.46006284871	-1.61923610418708	0.252562358780471	-6.41123290107744	1.44347479760787e-10	8.56413757273995e-10	yes	Bm13692	Bma-copa-1
WBGene00227616	709.095391068822	-1.75514355080584	0.273799901302694	-6.41031476803009	1.45219495632864e-10	8.60634344970207e-10	yes	Bm7355	Bma-ncx-3
WBGene00224864	424.587502858226	-3.43922917069697	0.536513532672442	-6.41033070231375	1.45204317910885e-10	8.60634344970207e-10	yes	Bm4603a	NA
WBGene00225636	118.749578007451	-4.17810636519631	0.651816202026965	-6.40994555244803	1.45571615300626e-10	8.62244255359981e-10	yes	Bm5375	Bma-glb-23
WBGene00231957	659.690326094134	-2.69533656338175	0.420522962794385	-6.40948723815503	1.46009868962336e-10	8.6436229056985e-10	yes	Bm11696	Bma-ape-1
WBGene00227103	378.408181732387	-2.22482923624448	0.34712565555202	-6.40929070110481	1.46198198263226e-10	8.6499927906707e-10	yes	Bm6842	Bma-magu-1
WBGene00229157	2528.63937400985	1.6879782689109	0.263407414570089	6.40824128533313	1.47207813340444e-10	8.70492119173765e-10	yes	Bm8896a	Bma-hum-1
WBGene00229596	495.808875305319	-2.95056581965622	0.460478629154181	-6.40760641829545	1.47821906534985e-10	8.73641328473449e-10	yes	Bm9335a	NA
WBGene00223916	791.461484169828	1.80795599126207	0.282215760281727	6.40628995863748	1.49103277905367e-10	8.80728568222716e-10	yes	Bm3655	Bma-stn-2
WBGene00234154	5715.722107775	1.55153554683961	0.242285051445372	6.40376093194272	1.51595423929591e-10	8.94955904906646e-10	yes	Bm13893	Bma-rpl-24.1
WBGene00229205	212.233582607846	-2.85003617569421	0.445298524760419	-6.40028209666222	1.55090141144338e-10	9.15083073987655e-10	yes	Bm8944a	NA
WBGene00269325	326.128347824688	-2.57670439311106	0.402646676434884	-6.39941801066316	1.55970304632771e-10	9.19769848178393e-10	yes	Bm18185	NA
WBGene00226985	3361.64530876735	1.37927481677913	0.215554705192231	6.39872284647692	1.56681944636371e-10	9.23458216049897e-10	yes	Bm6724	NA
WBGene00226409	425.488438754371	-2.63554894760885	0.411916650378894	-6.39825786402319	1.57159717339045e-10	9.25764909998828e-10	yes	Bm6148	NA
WBGene00226860	177.16460684365	-3.5697569859625	0.557950154566686	-6.39798547727769	1.574402575492e-10	9.26907889911913e-10	yes	Bm6599	Bma-mib-1
WBGene00227290	597.51167357589	-3.2078750568955	0.501470027503464	-6.39694275022914	1.58518726279915e-10	9.32744729318663e-10	yes	Bm7029a	Bma-lgc-46
WBGene00229277	212.084528933409	-3.86833207332823	0.604739427359077	-6.39669235760169	1.58778774577907e-10	9.33762112844279e-10	yes	Bm9016	NA
WBGene00221946	980.410775360162	-1.70483511369637	0.266588893787116	-6.39499676628602	1.60550753528785e-10	9.4366501594127e-10	yes	Bm1685a	Bma-vps-34
WBGene00226085	371.417726156893	-2.12823385321057	0.332882406482509	-6.39335035966342	1.62289816282752e-10	9.53363695981191e-10	yes	Bm5824	Bma-pacs-1
WBGene00224443	2371.06981163101	1.45272772938863	0.227275597438599	6.39192128746289	1.63814225464448e-10	9.61791466220034e-10	yes	Bm4182	NA
WBGene00232819	1296.92891364558	-1.74395428296357	0.272851190880639	-6.3915949105257	1.64164333516034e-10	9.63319185993598e-10	yes	Bm12558	NA
WBGene00223687	4622.4935764386	1.53543201041885	0.240236800574809	6.39132725188258	1.64451999398381e-10	9.64479022196854e-10	yes	Bm3426	NA
WBGene00226756	222.328213901327	-4.34711692232229	0.680390865334282	-6.38914650946484	1.66814177362327e-10	9.77797544002916e-10	yes	Bm6495	Bma-hpo-36
WBGene00220750	329.907078353086	2.28413268632178	0.357530176189802	6.3886430808828	1.67364182935913e-10	9.80485084832318e-10	yes	Bm489	NA
WBGene00227479	369.874028337109	-2.17109271894644	0.339971708995628	-6.38609820023101	1.70171746723338e-10	9.95843946554107e-10	yes	Bm7218	Bma-odr-4
WBGene00230612	982.728636353107	2.27071841848098	0.355568786930171	6.38615790234399	1.70105358069925e-10	9.95843946554107e-10	yes	Bm10351	NA
WBGene00229786	8505.45188732809	2.27070937821904	0.355698661380346	6.38380074135556	1.72745839194121e-10	1.01035571340884e-09	yes	Bm9525	Bma-tth-1
WBGene00230131	236.248090893906	-3.41280168766888	0.534656218580345	-6.38317028600318	1.73458833782733e-10	1.01397239715329e-09	yes	Bm9870a	NA
WBGene00230324	351.370491988433	-2.16847127153417	0.339952834481665	-6.37874155348782	1.78549054264318e-10	1.04315873306552e-09	yes	Bm10063	NA
WBGene00227908	1310.1961395878	-2.13433400046874	0.334659564127221	-6.37762738392071	1.79852442648478e-10	1.05020104794466e-09	yes	Bm7647	Bma-fzo-1
WBGene00229832	927.550539304769	1.83921918158464	0.28847117112398	6.3757469227113	1.82073376748905e-10	1.06259054023122e-09	yes	Bm9571	NA
WBGene00224302	543.012285340485	-2.51463844015187	0.394514152454717	-6.37401326290951	1.84144655179393e-10	1.07409362016723e-09	yes	Bm4041a	Bma-mig-39
WBGene00268453	138.554169167481	-3.30281901241005	0.518518756972566	-6.36971945179758	1.89374278104448e-10	1.10399640363937e-09	yes	Bm17310	NA
WBGene00229458	657.988310690661	2.35828496418149	0.370257535863392	6.3693098337142	1.89880685558508e-10	1.10634668067396e-09	yes	Bm9197	NA
WBGene00231924	133.393574701316	-4.3604563491896	0.684623589055532	-6.36912957557457	1.90103956193953e-10	1.10704559272729e-09	yes	Bm11663	Bma-hst-3.2
WBGene00233954	7317.45750986178	1.62557401936493	0.255342181545198	6.36625726908026	1.9369643946435e-10	1.12735325847937e-09	yes	Bm13693	NA
WBGene00224737	1116.94131285357	-1.62843080641284	0.255827969826048	-6.36533529746609	1.94863576627153e-10	1.13353052310529e-09	yes	Bm4476a	Bma-ddx-15
WBGene00227736	296.92949159714	-3.46962770628274	0.545187518875142	-6.3640996650867	1.96438561356597e-10	1.14207226529351e-09	yes	Bm7475	Bma-gcy-9
WBGene00229047	1783.49160012125	1.85813686623519	0.292029710674592	6.36283500724248	1.98063419399353e-10	1.15089454385253e-09	yes	NA	NA
WBGene00229489	5680.35034942634	1.63035937519567	0.25640257538425	6.35859204125537	2.03611368698415e-10	1.18121051196726e-09	yes	Bm9228	NA
WBGene00230225	2230.30836186384	1.53792255283459	0.241864687199036	6.35860724707197	2.03591217620276e-10	1.18121051196726e-09	yes	Bm9964	NA
WBGene00235018	930.124660149966	1.87413647844322	0.294736791700625	6.3586784250093	2.03496916974666e-10	1.18121051196726e-09	yes	Bm14683	Bma-pole-2.1
WBGene00221916	194.619129310081	-3.12012664826289	0.490901443820177	-6.35591255137117	2.07192878094143e-10	1.20133749392789e-09	yes	Bm1655	NA
WBGene00227834	797.979266799111	-2.14069879035554	0.336995809741461	-6.35230091435814	2.12117861147408e-10	1.22922816776337e-09	yes	Bm7573	NA
WBGene00225607	1320.19000167519	2.07391874797824	0.326569615602165	6.35061759849922	2.14452196861218e-10	1.24141290619554e-09	yes	Bm5346a	Bma-mpz-5.1
WBGene00226152	137.747399525847	-6.86651781370183	1.08122990656811	-6.35065472383811	2.14400443758495e-10	1.24141290619554e-09	yes	Bm5891	NA
WBGene00224561	114.784726695523	-5.99777616533705	0.944572002378533	-6.34972892509413	2.15694665286696e-10	1.24793106832988e-09	yes	Bm4300	Bma-twk-32
WBGene00221475	107.560850166493	3.41965822747336	0.538707512520562	6.34789407608796	2.18282285083733e-10	1.26222055298014e-09	yes	Bm1214	NA
WBGene00222463	706.95167285468	-4.24158120171221	0.668649786366274	-6.34350191714375	2.24600175820537e-10	1.29805333544609e-09	yes	Bm2202	NA
WBGene00223912	5477.98762481116	1.66076719607107	0.261899079620878	6.34124869195865	2.27910291495057e-10	1.31647373227468e-09	yes	Bm3651	NA
WBGene00225534	496.844458822328	-3.81816790628279	0.602127693235873	-6.34112655699942	2.28091069705064e-10	1.31680808830267e-09	yes	Bm5273	NA
WBGene00226986	359.687935038313	-2.52528615356654	0.398434093943843	-6.33802727214018	2.32725641621622e-10	1.34284073773596e-09	yes	Bm6725a	NA
WBGene00268875	1335.2371238289	1.90287626073545	0.30024552110326	6.3377340442691	2.33168858416616e-10	1.34467401395804e-09	yes	Bm17733	NA
WBGene00268771	102.983105915538	-6.77847786917828	1.06973303014308	-6.33660705818501	2.34879995561018e-10	1.35381342250474e-09	yes	Bm17629	Bma-nhr-2.7
WBGene00228190	2544.77885949438	-2.09406611609356	0.33077488926659	-6.33078925893264	2.43910294941638e-10	1.40510688725788e-09	yes	Bm7929	NA
WBGene00223571	164.285107420986	-3.19430967259305	0.50462744813615	-6.33003552302057	2.45104763861131e-10	1.41122920191941e-09	yes	Bm3310	NA
WBGene00224750	4500.98916963463	1.44179982414065	0.227799046335173	6.32926189699344	2.46336694262575e-10	1.41756051505021e-09	yes	Bm4489	NA
WBGene00229530	138.498604715131	-5.99645625326501	0.947533221956967	-6.32849182942669	2.47568963348901e-10	1.42388697921818e-09	yes	Bm9269	NA
WBGene00230476	1226.81890990109	-10.1564432961456	1.60540356857953	-6.32641131172526	2.50928411075791e-10	1.44243450894694e-09	yes	Bm10215	NA
WBGene00230081	645.052323396887	2.02280665786006	0.319745728607326	6.32629766993458	2.51113187254503e-10	1.44272268173298e-09	yes	Bm9820	Bma-prx-5.2
WBGene00228855	567.758572776504	2.08997582206829	0.330422025961409	6.32517101723838	2.5295227576819e-10	1.45250998652527e-09	yes	Bm8594	NA
WBGene00220742	822.560792267537	1.61590710913677	0.255793806007536	6.31722532440507	2.66301173379132e-10	1.52834337051816e-09	yes	Bm481a	NA
WBGene00303348	138.336393548397	-7.79605995396305	1.23509255155456	-6.31212611892967	2.7522778250149e-10	1.57872895583697e-09	yes	Bm18568	NA
WBGene00222517	1816.44899408932	-1.4888517300152	0.235888896894859	-6.31166515089862	2.76049001868608e-10	1.58259232478445e-09	yes	Bm2256a	Bma-rol-3
WBGene00224956	1509.07745014618	-2.26896143374529	0.359512141251121	-6.31122338691868	2.76838254276055e-10	1.58626839281707e-09	yes	Bm4695a	NA
WBGene00230323	375.408565573371	2.15509461577318	0.341627470799333	6.30831768514029	2.82084753119019e-10	1.61546666470887e-09	yes	Bm10062	NA
WBGene00225608	609.392475714675	-1.80941355200492	0.286844656686551	-6.30799113675716	2.82680399246833e-10	1.61801307581721e-09	yes	Bm5347a	Bma-tbc-12
WBGene00230648	523.100878583137	-2.17543491206571	0.344903118512855	-6.30737965329422	2.83799091307168e-10	1.62354899271559e-09	yes	Bm10387	Bma-npp-24
WBGene00224689	3459.34862928637	1.66181392891427	0.263560238885573	6.30525277993757	2.87723919875164e-10	1.64512369341642e-09	yes	Bm4428	NA
WBGene00221649	601.402079299096	-3.3404206409737	0.529941162674458	-6.30338021699536	2.91223296825377e-10	1.66424406692476e-09	yes	Bm1388a	Bma-clh-4
WBGene00225575	14924.036971812	1.37548316189447	0.218286087264945	6.30128644078439	2.95185293455942e-10	1.68598636427528e-09	yes	Bm5314a	NA
WBGene00227869	472.887402074545	-4.54853152317281	0.722182863375625	-6.29830996253786	3.0090833773137e-10	1.71775857154589e-09	yes	Bm7608	Bma-col-97
WBGene00224680	1042.58140588725	-1.83821570209406	0.291897394675666	-6.2974721104878	3.02538771533973e-10	1.72614639882136e-09	yes	Bm4419	Bma-unc-73
WBGene00230659	106.056391230463	3.71310416988837	0.58967334157194	6.29688322010632	3.03689892875057e-10	1.73179201817788e-09	yes	Bm10398	NA
WBGene00227209	1568.2462800528	1.54470556816578	0.245332785852074	6.29636826892423	3.04699987337029e-10	1.73662785335972e-09	yes	Bm6948a	NA
WBGene00226265	325.510411597655	-2.56807846524403	0.407876686798911	-6.29621292013222	3.05005352940207e-10	1.73744410247439e-09	yes	Bm6004	NA
WBGene00223934	7978.71227751268	1.68808036284361	0.268120751113114	6.29597058726517	3.05482297929626e-10	1.73923635617213e-09	yes	Bm3673	Bma-rps-23.2
WBGene00222555	303.311821308188	-2.30522106737425	0.366195425218443	-6.29505697947794	3.07286962991284e-10	1.74858194819523e-09	yes	Bm2294	NA
WBGene00234228	717.414541271454	-2.32155044345596	0.368827663299419	-6.29440433694177	3.08582509243598e-10	1.75502207353777e-09	yes	Bm13967	Bma-adsl-1
WBGene00228981	5084.46607581081	-8.63341366959951	1.37210941223615	-6.29207378989513	3.13252500924475e-10	1.78063689517547e-09	yes	Bm8720	NA
WBGene00230195	3723.14393328651	1.83034878764436	0.29093709850747	6.29121826344662	3.14984077879976e-10	1.78953043185787e-09	yes	Bm9934	NA
WBGene00235047	523.0848996063	-1.99514720745556	0.317188411110189	-6.29010120663726	3.17259063920598e-10	1.80150019603032e-09	yes	Bm14712	NA
WBGene00227432	3634.13835596673	1.28553963222328	0.20441663500199	6.28882102579744	3.19885999269289e-10	1.81545470453942e-09	yes	Bm7171a	Bma-glp-4
WBGene00224506	675.946613950097	-1.80882545459815	0.287706801003965	-6.28704447821942	3.23566696957382e-10	1.83458442599675e-09	yes	Bm4245	Bma-noah-2
WBGene00227646	16889.2382883865	3.32991990568919	0.529649211057905	6.2870289168148	3.23599119471195e-10	1.83458442599675e-09	yes	Bm7385	NA
WBGene00229088	209.132032654893	-2.62398187686506	0.417808936590739	-6.28033928205648	3.37834957495505e-10	1.91427898972202e-09	yes	Bm8827a	NA
WBGene00227746	105.205374610416	-4.54305387318992	0.723490190284242	-6.27935794320177	3.39974066237161e-10	1.92538167004819e-09	yes	Bm7485	NA
WBGene00231167	622.87983518663	-3.48954752538007	0.555743949952154	-6.27905625545811	3.40634334527528e-10	1.928101898818e-09	yes	Bm10906a	Bma-mes-4
WBGene00233253	165.245970512322	-3.33456654477275	0.531224231904605	-6.27713561336855	3.44867269755067e-10	1.95103104299131e-09	yes	Bm12992	NA
WBGene00269297	891.368404535924	1.73830403703294	0.27716211273627	6.27179530373621	3.56908604786319e-10	2.01808744078386e-09	yes	Bm18157	NA
WBGene00225369	1255.98613281019	1.95969834691146	0.312478069207801	6.27147483303297	3.57644113432482e-10	2.02117968113346e-09	yes	Bm5108	Bma-let-70.2
WBGene00225954	463.816197898212	-2.12195910968959	0.338427009659629	-6.27006429487924	3.60899052318396e-10	2.03849939145578e-09	yes	Bm5693	NA
WBGene00233988	2113.04467088211	1.36879857186757	0.218315488195927	6.26981888998703	3.61468291250558e-10	2.04063895719164e-09	yes	Bm13727	NA
WBGene00226458	702.736847322481	-2.22064301579846	0.354219820902182	-6.26910998414087	3.63117590603678e-10	2.04887044935145e-09	yes	Bm6197	NA
WBGene00231825	460.685940142077	-3.10896538719933	0.495992176518287	-6.26817424626192	3.65305877528565e-10	2.06013288300977e-09	yes	Bm11564	Bma-twk-2
WBGene00268669	248.91642862024	2.42050828955809	0.386308128121429	6.26574517426992	3.7104669247617e-10	2.09140731713948e-09	yes	Bm17526	NA
WBGene00224125	1136.66998358126	-1.54601751759378	0.24674557755764	-6.26563415197436	3.71311174178024e-10	2.09179770311121e-09	yes	Bm3864	Bma-ama-1
WBGene00227844	297.52617114901	-4.06251735178791	0.648557260848602	-6.2639301061441	3.75393785743917e-10	2.11368597700792e-09	yes	Bm7583	Bma-tba-8
WBGene00229799	200.902228352959	3.24589090509042	0.518221902491113	6.26351547375225	3.76393785953366e-10	2.11820347504743e-09	yes	Bm9538	NA
WBGene00229220	188.113170401216	-2.90191481480092	0.463412878303858	-6.26205043205155	3.79948008874244e-10	2.13708289505907e-09	yes	Bm8959a	NA
WBGene00231937	179.183143062201	-8.28180558580082	1.32263458101934	-6.26159765112001	3.81053077879823e-10	2.14105072337824e-09	yes	Bm11676	NA
WBGene00224669	665.103037081354	-1.97394863163527	0.315246671463335	-6.26160023346939	3.81046766442555e-10	2.14105072337824e-09	yes	Bm4408	Bma-sel-10
WBGene00225155	436.576284428094	-2.68284467016479	0.428537454170297	-6.2604671868393	3.83825833013185e-10	2.15549989556409e-09	yes	Bm4894a	Bma-nhr-88
WBGene00224315	517.347575414341	-2.04678578471275	0.326953491613756	-6.26017411409298	3.84547878513559e-10	2.15842352973954e-09	yes	Bm4054a	NA
WBGene00227158	3041.19498316148	1.46660883000278	0.234298018983995	6.25958698397261	3.85998386709712e-10	2.16543074010186e-09	yes	Bm6897a	NA
WBGene00224354	3800.69077391412	1.60355088808471	0.256207840284286	6.25878929507163	3.8797764229617e-10	2.17539530989192e-09	yes	Bm4093	NA
WBGene00223399	666.292058251546	-1.70480315828494	0.272399308601659	-6.25847094486553	3.88770307711605e-10	2.17869971084197e-09	yes	Bm3138	Bma-skih-2
WBGene00227240	420.722052412321	-3.17872121620432	0.507915806701699	-6.25836245744405	3.89040793331468e-10	2.1790758497369e-09	yes	Bm6979	NA
WBGene00222129	2983.06459428664	1.32008945476505	0.21099870269579	6.25638659337305	3.93999368932209e-10	2.2056965716346e-09	yes	Bm1868	NA
WBGene00229694	257.591591076377	-3.4480800478091	0.551743210038583	-6.2494290551722	4.11955810330817e-10	2.30501645310428e-09	yes	Bm9433	Bma-sulp-6
WBGene00234001	1104.02969309756	-1.5921948222528	0.254922633348554	-6.24579622977534	4.21646583611467e-10	2.35800790365181e-09	yes	Bm13740a	NA
WBGene00225854	4585.44907794574	1.49556840051536	0.239462370533788	6.24552574661973	4.22376948192436e-10	2.36086019816481e-09	yes	Bm5593a	NA
WBGene00229132	941.320642728896	2.30718672244026	0.369494821480518	6.24416524484879	4.26069372967936e-10	2.38025721134069e-09	yes	Bm8871	NA
WBGene00226092	435.847446750095	-2.45270192821337	0.392880109557861	-6.24287630894216	4.29596622038936e-10	2.39871172753893e-09	yes	Bm5831a	NA
WBGene00221054	189.794379226954	-5.71339372326624	0.915250854779304	-6.2424347307973	4.30811569151228e-10	2.40424268929969e-09	yes	Bm793a	NA
WBGene00227732	645.186534609481	-1.88776049962399	0.302439768370149	-6.24177339440893	4.3263742886407e-10	2.41191990128955e-09	yes	Bm7471	Bma-toe-1
WBGene00221134	167.256416374345	3.0810459065427	0.493610642808535	6.24185469140664	4.32412572389248e-10	2.41191990128955e-09	yes	NA	NA
WBGene00228663	260.125872127282	-3.56004977605799	0.570389879311374	-6.24143222940071	4.33582290115597e-10	2.41593044128373e-09	yes	Bm8402	Bma-cpd-2
WBGene00224508	500.218432509361	-2.81253115905209	0.450832055470844	-6.23853411691127	4.41690299772284e-10	2.45982929420999e-09	yes	Bm4247	NA
WBGene00225794	583.079889187489	1.75320304290114	0.28103214677217	6.23844305015554	4.41947459502717e-10	2.45998287198525e-09	yes	Bm5533	Bma-pgap-2
WBGene00227708	1370.74828723662	-3.91050305395265	0.627324719596419	-6.23361862173774	4.55781928057576e-10	2.53567152603163e-09	yes	Bm7447	NA
WBGene00225845	29910.9741094296	1.57179025821528	0.252188260553197	6.23260676277087	4.58736690873403e-10	2.55078549180515e-09	yes	Bm5584a	Bma-enpl-1
WBGene00230928	380.773119830506	-2.6609524487353	0.426951268758742	-6.23245003222822	4.59196033985726e-10	2.55201530298603e-09	yes	Bm10667	NA
WBGene00230713	430.442440260845	-3.11234475449422	0.499450071828798	-6.23154331142248	4.61862259544093e-10	2.56550239036545e-09	yes	Bm10452	Bma-npp-22
WBGene00223559	403.910332256671	-2.41613714411986	0.387855265866884	-6.22948134717115	4.6798186906015e-10	2.5981480450671e-09	yes	Bm3298a	NA
WBGene00224877	204.251666013288	-3.74791425292352	0.602029376167757	-6.22546739626067	4.80122494986533e-10	2.66417013660316e-09	yes	Bm4616	NA
WBGene00221442	146.306877406717	-3.65142074436646	0.586552827105041	-6.22522060355284	4.80878894252425e-10	2.6669862069952e-09	yes	Bm1181	NA
WBGene00224394	236.402945475262	-3.12690070016826	0.502322082051597	-6.22489198045462	4.81887902536795e-10	2.67119962528803e-09	yes	Bm4133a	NA
WBGene00222815	3743.03124596223	1.29221163397553	0.207671245588948	6.22239073257766	4.89635774431588e-10	2.71274422080375e-09	yes	Bm2554a	Bma-max-1
WBGene00225912	727.839203990078	-1.83974900989055	0.295882896503583	-6.21782817334379	5.04083110946061e-10	2.79134394510958e-09	yes	Bm5651a	Bma-ddx-19
WBGene00268986	604.561351912319	-2.57037182690397	0.413509776279328	-6.21598804756595	5.10026862424565e-10	2.82279846636323e-09	yes	Bm17844	NA
WBGene00224017	5188.32859103402	1.50625797645911	0.242344156393713	6.21536742982996	5.12046888184973e-10	2.83105387353043e-09	yes	Bm3756a	NA
WBGene00234240	7449.45056161123	1.26715630714587	0.203872505415039	6.2154350071199	5.11826555123561e-10	2.83105387353043e-09	yes	Bm13979	NA
WBGene00223681	8860.02921993672	1.25285137789644	0.201578827989675	6.21519328389294	5.12615110783563e-10	2.83273383808452e-09	yes	Bm3420a	Bma-vps-36
WBGene00230592	893.584116653595	1.56935685831031	0.252543241072152	6.21421049182601	5.15833427650163e-10	2.84904906044923e-09	yes	Bm10331	NA
WBGene00222101	198.308384101248	-3.38881999417697	0.54536637661201	-6.21384107914646	5.17048222943497e-10	2.85428733067469e-09	yes	Bm1840	Bma-mrps-30
WBGene00230350	1607.06905014239	-1.42785170411653	0.230011676455692	-6.20773573810972	5.37534402283787e-10	2.9658502165143e-09	yes	Bm10089a	Bma-die-1
WBGene00223742	753.206087268879	-2.57170989904993	0.414441585822176	-6.20524094836702	5.46131630848195e-10	3.01173464978817e-09	yes	Bm3481a	NA
WBGene00234281	2128.50710900761	1.49959949568213	0.241679765133534	6.20490298330756	5.47306554124767e-10	3.01666138243152e-09	yes	Bm14020	NA
WBGene00232295	642.325309012826	-1.87295555051457	0.301865113503678	-6.20461082360799	5.48324224218149e-10	3.02071674164394e-09	yes	Bm12034a	Bma-rin-1
WBGene00229344	5239.0361392256	1.7750687712664	0.286092780838016	6.20452136564547	5.48636199234234e-10	3.02088225837349e-09	yes	Bm9083	NA
WBGene00223739	3997.34898514311	1.81155913325432	0.292130073941837	6.20120725268088	5.60316676298021e-10	3.08361231973975e-09	yes	Bm3478a	NA
WBGene00228623	354.72903695433	-2.49764573911457	0.402773309724941	-6.20112027984238	5.60626453810107e-10	3.08373329187644e-09	yes	Bm8362a	NA
WBGene00229141	223.419659372504	-4.29160640423778	0.692133360682485	-6.20054840299274	5.6266751552543e-10	3.09337220567213e-09	yes	Bm8880	NA
WBGene00230981	666.534248302559	-2.43285622410591	0.392396168679878	-6.19999994467496	5.6463180589103e-10	3.10257938467815e-09	yes	Bm10720	Bma-hrpf-2.2
WBGene00225591	349.93564199387	2.76206653443285	0.445548085590263	6.19925575658946	5.67307800511484e-10	3.11568584442878e-09	yes	Bm5330	NA
WBGene00224774	2480.41992920242	1.40323179947512	0.226397337300036	6.19809321173894	5.71512931107454e-10	3.13556633733557e-09	yes	Bm4513a	Bma-byn-1
WBGene00227280	274.750780191408	-3.93879325117202	0.635483113955575	-6.19810843856249	5.71457656913442e-10	3.13556633733557e-09	yes	Bm7019a	NA
WBGene00224647	3059.16830586431	1.7983952396072	0.290244177765126	6.19614578819395	5.78625351355167e-10	3.17296347992355e-09	yes	Bm4386a	Bma-nhl-1
WBGene00229526	1568.66187568943	-1.44167654302149	0.232691103359715	-6.19566679690723	5.8038792418442e-10	3.18100082232024e-09	yes	Bm9265	NA
WBGene00222087	5951.59598948097	1.26761902641733	0.20462726169103	6.1947709994347	5.83698314853505e-10	3.19750891802419e-09	yes	Bm1826	NA
WBGene00230171	361.606802397589	-2.32334978804121	0.375177767779269	-6.19266381852381	5.91558142815684e-10	3.23890930008689e-09	yes	Bm9910a	Bma-cee-1
WBGene00233931	2868.89883766612	1.49957579417758	0.242367459727619	6.18719937017476	6.12424903877083e-10	3.35144680543562e-09	yes	Bm13670a	Bma-pbs-4
WBGene00223490	206.164728246475	-3.52410116673093	0.56963029175518	-6.18664635244774	6.14576268806379e-10	3.36150317522223e-09	yes	Bm3229a	Bma-msh-5
WBGene00229273	606.93135607087	-2.27164084168351	0.367220706381206	-6.18603690426256	6.16955702092063e-10	3.37279609587574e-09	yes	Bm9012a	NA
WBGene00230942	221.174944404975	-3.51199234989215	0.567925537263038	-6.18389580932957	6.25386526248831e-10	3.41714259498023e-09	yes	Bm10681	NA
WBGene00220949	80.6041570907022	-8.26911742233101	1.3372905271934	-6.18348612674732	6.27012464674597e-10	3.42428061110515e-09	yes	Bm688	NA
WBGene00226790	625.219726955925	-1.88857713751413	0.30542933970659	-6.18335206214434	6.27545432181121e-10	3.42544539267484e-09	yes	Bm6529a	Bma-mvk-1
WBGene00229307	477.984867843645	-1.89327347399644	0.306246198942895	-6.18219419712527	6.32166901024585e-10	3.44891463568148e-09	yes	Bm9046	NA
WBGene00224174	483.153660712179	-2.21037757250048	0.35755322073614	-6.18195402617182	6.33129662207876e-10	3.45240932852793e-09	yes	Bm3913a	NA
WBGene00225694	174.705625320842	-3.41191770672125	0.551956241455023	-6.18150036265017	6.34952145018132e-10	3.46058608029974e-09	yes	Bm5433	NA
WBGene00233987	3631.04006876057	1.49683665726554	0.242302389415785	6.17755632073858	6.51013553194476e-10	3.54631938102634e-09	yes	Bm13726	Bma-iars-1
WBGene00227900	13783.2946465886	1.50972707156799	0.24441520044913	6.17689517179686	6.53744477333151e-10	3.55938621678085e-09	yes	Bm7639a	Bma-vab-10
WBGene00226881	448.839395784756	-2.23581693653026	0.361992019573852	-6.17642604155287	6.55689029800361e-10	3.5681604643529e-09	yes	Bm6620	Bma-msh-6
WBGene00233035	507.092954723113	-3.49199138937942	0.565400540868922	-6.17613733445114	6.56888529166558e-10	3.57287339594907e-09	yes	Bm12774	Bma-ints-8
WBGene00223842	1867.69070453114	1.53095473451883	0.247885662447018	6.17605197253411	6.57243594558809e-10	3.57299092627988e-09	yes	Bm3581a	Bma-tli-1
WBGene00222598	78.8384251415033	-4.88965895439175	0.791810242337619	-6.17529136773511	6.60415630761338e-10	3.58841454544003e-09	yes	Bm2337	NA
WBGene00229294	1022.041677647	2.36843916234663	0.38355744953544	6.17492676837656	6.61941451588731e-10	3.59488223708731e-09	yes	Bm9033	Bma-syx-2
WBGene00221277	357.024653945457	2.09305945303026	0.33900397024413	6.17414436628268	6.65227363497063e-10	3.60906896196001e-09	yes	Bm1016a	NA
WBGene00227355	5099.38741443941	1.41111340930828	0.228549160456693	6.17422267703174	6.64897760698637e-10	3.60906896196001e-09	yes	Bm7094	Bma-ipla-6
WBGene00230866	213.143990133835	-4.16812629923016	0.675320589356891	-6.17207051720351	6.74014243757275e-10	3.65488999081943e-09	yes	Bm10605	NA
WBGene00227028	1044.12578613041	-1.77852850526641	0.288240259976087	-6.17029871335103	6.81610972380897e-10	3.69421424838711e-09	yes	Bm6767a	NA
WBGene00234970	627.623210412656	-1.77507810744471	0.28771600509955	-6.16954940282355	6.84848766007013e-10	3.70988600999249e-09	yes	Bm14785	Bma-ctn-1
WBGene00226127	192.748944071124	-2.85781908617631	0.463310636724964	-6.16825701731687	6.90468494748883e-10	3.73843856555547e-09	yes	Bm5866	Bma-mrrf-1
WBGene00224539	206.375990184752	-4.63742689787824	0.751836567110118	-6.16813161363434	6.91016180648025e-10	3.73951433113312e-09	yes	Bm4278	NA
WBGene00233994	9700.85071055859	1.22308528901875	0.19838239382245	6.16529151328518	7.0353409243321e-10	3.80533457870865e-09	yes	Bm13733	Bma-eef-2
WBGene00227189	305.039509543182	-2.18980403335594	0.355244195059902	-6.16422186149079	7.08305765116418e-10	3.82921103593462e-09	yes	Bm6928a	Bma-nova-1
WBGene00227756	1097.6666619657	-2.89661352251795	0.469970450998598	-6.16339498869173	7.12016032635806e-10	3.84732818441385e-09	yes	Bm7495a	Bma-try-1
WBGene00225210	1962.34545944687	-1.90634950246566	0.3093150823476	-6.16313141925411	7.13202677051622e-10	3.85179772409684e-09	yes	Bm4949a	Bma-sul-1
WBGene00224995	2586.42859875428	1.70286758648831	0.276416602987357	6.16051122864785	7.25104732485595e-10	3.91410438719554e-09	yes	Bm4734	NA
WBGene00223100	192.518545599682	-2.96357654996688	0.481224964551981	-6.15840151336696	7.34828595237706e-10	3.963354826113e-09	yes	Bm2839	Bma-cof-2.1
WBGene00222983	4737.5398679729	1.25937921619525	0.204498744389566	6.158371387338	7.34968365794357e-10	3.963354826113e-09	yes	Bm2722	Bma-cdc-6
WBGene00222102	429.677243675789	-2.0641723730698	0.335204375533737	-6.1579517563966	7.36917953890766e-10	3.9718691528871e-09	yes	Bm1841	Bma-eif-3.E
WBGene00231437	183.439506167926	-3.69847013527916	0.60084618418187	-6.15543583806745	7.48713037943701e-10	4.03341387710747e-09	yes	Bm11176a	Bma-ptr-18
WBGene00228412	1200.3399786759	1.57938243613841	0.256610441202952	6.15478633189865	7.51787825935932e-10	4.04794299241382e-09	yes	Bm8151	NA
WBGene00233060	816.969878751903	-2.90242008593845	0.472022948152694	-6.14889614434498	7.80240446774957e-10	4.1990338459034e-09	yes	Bm12799	NA
WBGene00228376	622.38028834854	-1.73510732417394	0.282256200548086	-6.14727797229857	7.88239221787982e-10	4.23995143647502e-09	yes	Bm8115a	NA
WBGene00226141	4029.14014396127	1.57273450475933	0.255887497763346	6.14619517759267	7.93636184905759e-10	4.26683979993237e-09	yes	Bm5880	Bma-set-17
WBGene00226059	817.021385281678	1.69105037633903	0.275197759766517	6.14485516805717	8.00365101439922e-10	4.30085860678474e-09	yes	Bm5798	Bma-pigs-1
WBGene00222958	593.002060126972	-2.47877800268128	0.404345040441272	-6.13035342284929	8.76840686568143e-10	4.70944759728203e-09	yes	Bm2697	Bma-cps-6
WBGene00231811	232.239154054955	-4.28784561570728	0.699508171738665	-6.12980060697448	8.79892764219375e-10	4.72347242916363e-09	yes	Bm11550a	NA
WBGene00229266	259.467990693228	-3.43706783072391	0.560736103182537	-6.12956399849473	8.81202235581402e-10	4.7281331768927e-09	yes	Bm9005	Bma-orc-4
WBGene00223633	159.819051868112	-2.82706862510864	0.461754870319458	-6.12244462771509	9.2150445548072e-10	4.94190202226022e-09	yes	Bm3372	NA
WBGene00227891	166.17275930803	-3.05033431130223	0.498283003149745	-6.12169046911187	9.2587753401486e-10	4.96287032364644e-09	yes	Bm7630	Bma-him-14
[truncated: 8,716 more rows]
